# Supplementary material for: Regio- and stereo-selective synthesis of β-phenylthio enamidesviaintramolecular 1,2-thiol migration
Source: Royal Society of Chemistry journal article supplement (doi:10.1039/d3qo02078a), 2024-01-01

## Supporting Information

### Regio- and Stereo-Selective Synthesis of $\beta$ -Phenylthio Enamides via Intramolecular 1,2-Thiol Migration

Yunqing Zhuang, Jin Zhang, Kai Yang, Gehua Bi, Xin Huang\* and Weimin Zhang\*

School of Chemistry and Chemical Engineering, Shandong University of Technology, Zibo 255049, Shandong, P. R. China.

E-mail: [huangxinroy@sdut.edu.cn](mailto:huangxinroy@sdut.edu.cn), [wmzhang@sdut.edu.cn](mailto:wmzhang@sdut.edu.cn)

### Table of Contents

|                                                                              |           |
|------------------------------------------------------------------------------|-----------|
| <b>1 General Information</b> .....                                           | <b>2</b>  |
| <b>2 Experimental details for Single crystals A (3d)</b> .....               | <b>2</b>  |
| <b>3 General procedure and characterization for vinyl sulfoxides 1</b> ..... | <b>3</b>  |
| <b>4 Characterization of products</b> .....                                  | <b>5</b>  |
| <b>5 Density functional theory (DFT) calculations</b> .....                  | <b>13</b> |
| <b>6 NMR Spectra of Compounds</b> .....                                      | <b>25</b> |

## 1 General Information

All reagents used in the experiments were obtained from commercial sources and used without further purification. Thin layer chromatography (TLC) employed glass 0.25 mm silica gel plates. All NMR spectra were recorded on Bruker AVANCE 400 for  $^1\text{H}$  and  $^{13}\text{C}$  NMR in  $\text{CDCl}_3$ . The NMR chemical shift was reported in ppm relative to 7.26 / 77.23 ppm of  $\text{CDCl}_3$  as the standards of  $^1\text{H}$  and  $^{13}\text{C}$  NMR, respectively. The HRMS of products were tested on electrospray ionization quadrupole time-of-flight (ESI-Q-TOF) mass spectrometer. IR was tested on Bruker ALPHA. Besides, melting point was tested on micro melting point apparatus.

## 2 Experimental details for Single crystals A (3d)

Pure **3d** was carefully dissolved in dichloromethane to form a saturated solution, then and *n*-hexane was slowly added dropwise, and the solvent was slowly evaporated at room temperature until the crystals were precipitated.

A suitable crystal was selected and detected on a Bruker D8 VENTURE diffractometer. The crystal was kept at 193.00 K during data collection. Using Olex2, the structure was solved with the SHELXT structure solution program using Intrinsic Phasing and refined with the SHELXL refinement package using Least Squares minimisation.

**Table 1 Crystal data and structure refinement for A.**

|                                               |                                                               |
|-----------------------------------------------|---------------------------------------------------------------|
| Identification code                           | A                                                             |
| Empirical formula                             | $\text{C}_{16}\text{H}_{13}\text{Cl}_2\text{NOS}$             |
| Formula weight                                | 338.23                                                        |
| Temperature/K                                 | 193.00                                                        |
| Crystal system                                | monoclinic                                                    |
| Space group                                   | $C2/c$                                                        |
| $a/\text{\AA}$                                | 14.980(3)                                                     |
| $b/\text{\AA}$                                | 20.733(3)                                                     |
| $c/\text{\AA}$                                | 20.244(3)                                                     |
| $\alpha/^\circ$                               | 90                                                            |
| $\beta/^\circ$                                | 98.28(5)                                                      |
| $\gamma/^\circ$                               | 90                                                            |
| Volume/ $\text{\AA}^3$                        | 6222.0(19)                                                    |
| Z                                             | 16                                                            |
| $\rho_{\text{calc}}/\text{g/cm}^3$            | 1.444                                                         |
| $\mu/\text{mm}^{-1}$                          | 0.548                                                         |
| F(000)                                        | 2784.0                                                        |
| Crystal size/ $\text{mm}^3$                   | $0.15 \times 0.12 \times 0.1$                                 |
| Radiation                                     | $\text{MoK}\alpha$ ( $\lambda = 0.71073$ )                    |
| $2\theta$ range for data collection/ $^\circ$ | 3.732 to 56.048                                               |
| Index ranges                                  | $-19 \leq h \leq 18, -27 \leq k \leq 25, -23 \leq l \leq 26$  |
| Reflections collected                         | 23013                                                         |
| Independent reflections                       | 7235 [ $R_{\text{int}} = 0.1163, R_{\text{sigma}} = 0.1243$ ] |
| Data/restraints/parameters                    | 7235/0/381                                                    |
| Goodness-of-fit on $F^2$                      | 1.030                                                         |
| Final R indexes [ $I > 2\sigma(I)$ ]          | $R_1 = 0.0969, wR_2 = 0.2476$                                 |
| Final R indexes [all data]                    | $R_1 = 0.1776, wR_2 = 0.3043$                                 |
| Largest diff. peak/hole / $e \text{\AA}^{-3}$ | 0.67/-0.49                                                    |

### 3 General procedure and characterization for vinyl sulfoxides 1

Unless noted otherwise, the vinyl sulfoxides **1** were synthesized and confirmed by **GP 1** according to our previous report.<sup>1</sup>

#### General Procedure 1 (GP 1):

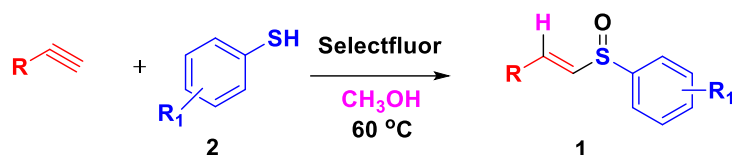

The mixture of alkyne (0.5 mmol), Selectfluor (1.5 equiv), thiophenol **2** (0.8 mmol) and methanol (4 mL) was stirred at 60°C in heating mantle under air for 12 h. After completion of reaction (monitored by TLC), the mixture was washed with water and extracted with ethyl acetate then dried over Na<sub>2</sub>SO<sub>4</sub>. The organic layer was then evaporated under reduced pressure and the residue was separated by column chromatography on silica gel (200-300) with petroleum ether/ethyl acetate (5:1) to get the desired product **1**.

#### General Procedure 2 (GP 2):

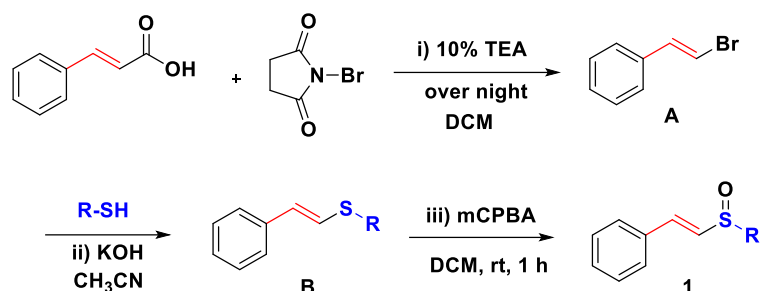

**i) According to the literature**<sup>2</sup>: To a solution of cinnamic acid (1.48 g, 10.0 mmol) in methylene chloride triethylamine (0.10 mL, 0.5 mmol) was added at room temperature and stirred for five minutes. N-bromosuccinimide (2.13 g, 12.0 mmol) was added in one portion and stirred over night. The solvent was removed under reduced pressure. The crude was purified by flash column chromatography (silica gel, hexanes) to afford 0.97 g of colorless oil **A** in 58% yield.

**ii) According to the literature**<sup>3</sup>: A 4 mL vial sealed equipped with a magnetic stirrer bar was charged with KOH (56.0 mg, 1.0 mmol) and vinyl bromide (0.6 mmol) in dioxane (0.25 mL). The aliphatic thiol (0.5 mmol) was added via syringe, and the vial was sealed with a cap containing a PTFE septum and the reaction vessel was heated at 110 °C in an oil bath. After stirring at this temperature for 12 h, the heterogeneous mixture was cooled to room temperature and diluted with ethyl acetate (20 mL). The resulting solution was directly filtered then washed with ethyl acetate (20 mL) and concentrated to give the crude material which was then purified by column chromatography (SiO<sub>2</sub>, hexane) to afford the vinyl thioether **B**.

**Noting:** **B** could smoothly undergo the next oxidation reaction by *m*-CPBA without column chromatography.

**iii) According to our previous report**<sup>4</sup>: *m*-CPBA (2.0 equiv) was slowly added to the vinyl thioether organic phase (DCM as the solvent) in a new reaction vessel and stirred at ambient temperature for 1 h. After completion of the reaction (monitored by TLC), the mixture was washed with water and extracted with ethyl

acetate and then dried over Na<sub>2</sub>SO<sub>4</sub>. The organic layer was then evaporated under reduced pressure, and the residue was separated by column chromatography on a silica gel (200-300) with petroleum ether/ethyl acetate (2:1 to 1:1) to get the desired product **1**.

### General Procedure 3 (GP 3):

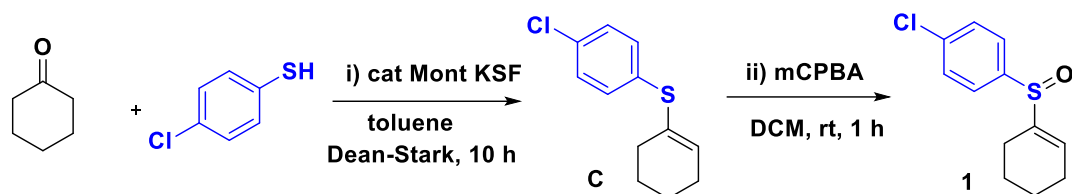

**i) According to the literature**<sup>5</sup>: To a solution of cyclohexanone (1.11 g, 11.3 mmol) in toluene (20 mL) was added a slurry of montmorillonite KSF (1.0 g) in 5 mL of toluene. An additional 5 mL of toluene was used to wash any remaining montmorillonite KSF into the reaction flask. Thiophenol (1.18g, 10.7 mmol) was added, and the mixture was heated at reflux

for 10 h with magnetic stirring. Water formed during the reaction was removed with a Dean-Stark trap. After being cooled to ambient temperature, the mixture was filtered to remove the montmorillonite KSF and the filter cake washed with hexanes. The solution was concentrated in vacuo to remove the toluene. The residue **C** was a pale yellow oil, which was used directly without further purification.

**ii) According to our previous report**<sup>4</sup>: *m*-CPBA (2.0 equiv) was slowly added to organic phase containing **C** (DCM as the solvent) in a new reaction vessel and stirred at ambient temperature for 1 h. After completion of the reaction (monitored by TLC), the mixture was washed with water and extracted with ethyl acetate and then dried over Na<sub>2</sub>SO<sub>4</sub>. The organic layer was then evaporated under reduced pressure, and the residue was separated by column chromatography on a silica gel (200-300) with petroleum ether/ethyl acetate (2:1 to 1:1) to get the desired product **1**.

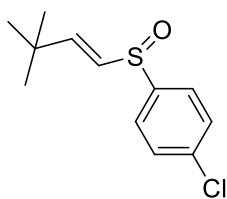

### (E)-1-chloro-4-((3,3-dimethylbut-1-en-1-yl)sulfinyl)benzene

Eluent in chromatography: petroleum ether/ethyl acetate 5:1, **1i** was isolated as a yellow oily liquid by **GP1** (90.7 mg, 75%); <sup>1</sup>H NMR (400 MHz, Chloroform-*d*) δ 7.52 (d, *J* = 10.8 Hz, 2H), 7.47 (d, *J* = 8.0 Hz, 2H), 6.60 (d, *J* = 15.6 Hz, 1H), 6.09 (d, *J* = 15.2 Hz, 1H), 1.07 (s, 9H).

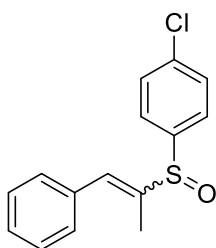

### 1-chloro-4-((1-phenylprop-1-en-2-yl)sulfinyl)benzene<sup>6</sup>

Eluent in chromatography: petroleum ether/ethyl acetate 5:1, **1u** was isolated as a colorless oily liquid by **GP1** (63.5 mg, 46%, *E/Z*=1.3); <sup>1</sup>H NMR (400 MHz, Chloroform-*d*) δ 7.60-7.03 (m, 11H), 1.90 (s, 3H, *E*), 1.88 (s, 3H, *Z*).

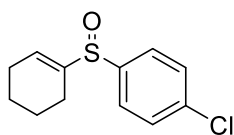

#### **1-chloro-4-(cyclohex-1-en-1-ylsulfinyl)benzene**<sup>7</sup>

Eluent in chromatography: petroleum ether/ethyl acetate 2:1, **1v** was isolated as a yellow solid by **GP3**; <sup>1</sup>H NMR (400 MHz, Chloroform-*d*) δ 7.52 (d, *J* = 8.8 Hz, 2H), 7.46 (d, *J* = 8.8 Hz, 2H), 6.71 (t, *J* = 3.6 Hz, 1H), 2.26-2.17 (m, 3H), 1.65-1.46 (m, 5H); <sup>13</sup>C NMR (100 MHz, Chloroform-*d*) δ 143.8, 141.5, 136.9, 135.3, 129.5, 126.3, 26.0, 22.2, 21.9, 19.4; IR (KBr): ν<sub>max</sub> 3073, 2918, 1572, 1471, 1241, 1080, 823, 739, 556.

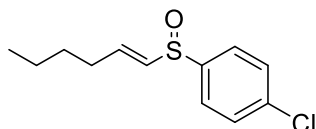

#### **(E)-1-chloro-4-(hex-1-en-1-ylsulfinyl)benzene**<sup>8</sup>

Eluent in chromatography: petroleum ether/ethyl acetate 2:1, **1w** was isolated as a yellow oily liquid (Noting: mixed with 1-chloro-4-(hex-1-en-2-ylsulfinyl)benzene **1w'**, the ratio of **1w/1w'** = 6.9:1) by **GP2**; <sup>1</sup>H NMR (400 MHz, Chloroform-*d*) δ 7.54 (d, *J* = 8.8 Hz, 2H), 7.47 (d, *J* = 8.8 Hz, 2H), 6.66-6.58 (m, 1H), 6.20 (d, *J* = 15.2 Hz, 1H), 2.25-2.19 (m, 2H), 1.47-1.29 (m, 4H), 0.89 (t, *J* = 7.2 Hz, 3H); <sup>13</sup>C NMR (100 MHz, Chloroform-*d*) δ 143.1, 142.4, 137.2, 135.0, 129.7, 126.1, 32.0, 30.3, 22.3, 14.0; IR (KBr): ν<sub>max</sub> 2957, 2911, 1474, 1050, 823, 741.

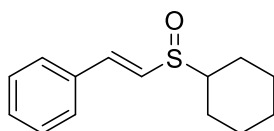

#### **(E)-(2-(cyclohexylsulfinyl)vinyl)benzene**<sup>9</sup>

Eluent in chromatography: petroleum ether/ethyl acetate 2:1, **1x** was isolated as a pale yellow solid by **GP2**; <sup>1</sup>H NMR (400 MHz, Chloroform-*d*) δ 7.49-7.47 (m, 2H), 7.39-7.34 (m, 3H), 7.22 (d, *J* = 15.6 Hz, 1H), 6.82 (d, *J* = 15.6 Hz, 1H), 2.74-2.66 (m, 1H), 2.09-1.86 (m, 4H), 1.71-1.68 (m, 1H), 1.52-1.22 (m, 5H); <sup>13</sup>C NMR (100 MHz, Chloroform-*d*) δ 138.2, 134.1, 129.8, 129.1, 128.5, 127.8, 61.2, 26.3, 25.7, 25.5, 24.9; IR (KBr): ν<sub>max</sub> 2930, 2854, 1711, 1446, 1044, 744.

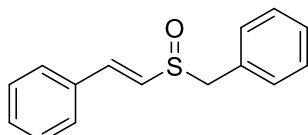

#### **(E)-(2-(benzylsulfinyl)vinyl)benzene**<sup>10</sup>

Eluent in chromatography: petroleum ether/ethyl acetate 2:1, **1y** was isolated as a yellow solid by **GP2**; <sup>1</sup>H NMR (400 MHz, Chloroform-*d*) δ 7.38-7.28 (m, 10H), 7.12 (d, *J* = 15.6 Hz, 1H), 6.76 (d, *J* = 15.6 Hz, 1H), 4.16-4.04 (m, 2H); IR (KBr): ν<sub>max</sub> 2962, 2914, 1704, 1038, 961, 698.

## **4 Characterization of products**

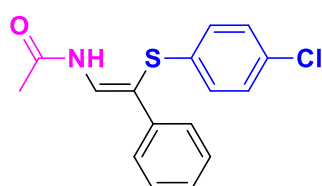

#### **(Z)-N-(2-((4-chlorophenyl)thio)-2-phenylvinyl)acetamide (3a)**

Eluent in chromatography: petroleum ether/ethyl acetate 5:1, **3a** was isolated as a pale yellow oily liquid (47.9

mg, 79%);  $^1\text{H}$  NMR (400 MHz, Chloroform-*d*)  $\delta$  8.17 (br.d,  $J = 11.2$  Hz, 1H), 7.95 (d,  $J = 11.6$  Hz, 1H), 7.57 (d,  $J = 8.0$  Hz, 2H) 7.30-7.20 (m, 3H), 7.17 (d,  $J = 8.0$  Hz, 2H), 7.09 (d,  $J = 8.0$  Hz, 2H), 2.15 (s, 3H);  $^{13}\text{C}$  NMR (100 MHz, Chloroform-*d*)  $\delta$  167.8, 137.4, 133.2, 132.0, 130.1, 129.5, 128.8, 128.2, 127.8, 126.5, 111.6, 23.8; IR (KBr):  $\nu_{\text{max}}$  3061, 2924, 1676, 1620, 1468, 1241, 1092, 1011, 904, 814, 761, 694, 574, 485; HRMS(ESI, *m/z*) calcd. for  $\text{C}_{16}\text{H}_{15}\text{ClINOS}^+$   $[\text{M}+\text{H}]^+$  304.0557, found 304.0561.

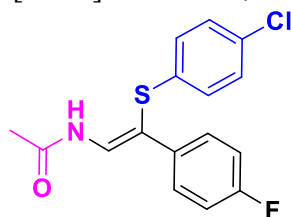

**(Z)-N-(2-((4-chlorophenyl)thio)-2-(4-fluorophenyl)vinyl)acetamide (3b)**

Eluent in chromatography: petroleum ether/ethyl acetate 5:1, **3b** was isolated as a yellow solid (m.p. 125-126°C) (45.6 mg, 71%);  $^1\text{H}$  NMR (400 MHz, Chloroform-*d*)  $\delta$  8.13 (br.d,  $J = 10.8$  Hz, 1H), 7.85 (d,  $J = 10.8$  Hz, 1H), 7.53-7.50 (m, 2H), 7.18 (d,  $J = 8.0$  Hz, 2H), 7.07 (d,  $J = 8.0$  Hz, 2H), 6.96 (t,  $J = 10.8$  Hz, 2H), 2.15 (s, 3H);  $^{13}\text{C}$  NMR (100 MHz, Chloroform-*d*)  $\delta$  167.8, 162.5 (d,  $J = 246$  Hz), 133.5 (d,  $J = 3.1$  Hz), 132.8, 132.2, 129.8, 129.5, 128.4, 128.2 (d,  $J = 8.0$  Hz), 115.8 (d,  $J = 21.6$  Hz), 110.9, 23.8;  $^{19}\text{F}$  NMR (Chloroform-*d*)  $\delta$  -114.4; IR (KBr):  $\nu_{\text{max}}$  3160, 1710, 1623, 1401, 1272, 1222, 1161, 1090, 1008, 821, 640; HRMS(ESI, *m/z*) calcd. for  $\text{C}_{16}\text{H}_{13}\text{ClFNNaOS}^+$   $[\text{M}+\text{Na}]^+$  344.0283, found 344.0286.

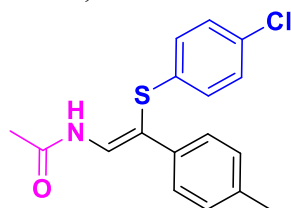

**(Z)-N-(2-((4-chlorophenyl)thio)-2-(p-tolyl)vinyl)acetamide (3c)**

Eluent in chromatography: petroleum ether/ethyl acetate 5:1, **3c** was isolated as a white solid (m.p. 112-113°C) (40.6 mg, 64%);  $^1\text{H}$  NMR (400 MHz, Chloroform-*d*)  $\delta$  8.14 (br.d,  $J = 11.2$  Hz, 1H), 7.90 (d,  $J = 11.2$  Hz, 1H), 7.46 (d,  $J = 7.2$  Hz, 2H), 7.07-7.07 (m, 6H), 2.30 (s, 3H), 2.14 (s, 3H);  $^{13}\text{C}$  NMR (100 MHz, Chloroform-*d*)  $\delta$  167.7, 137.7, 134.4, 133.4, 131.9, 129.5, 129.4, 129.3, 128.2, 126.4, 111.7, 23.8, 21.3; IR (KBr):  $\nu_{\text{max}}$  3144, 1711, 1631, 1476, 1452, 1399, 1298, 1211, 1091, 647; HRMS(ESI, *m/z*) calcd. for  $\text{C}_{17}\text{H}_{16}\text{ClINNaOS}^+$   $[\text{M}+\text{Na}]^+$  340.0533, found 340.0542.

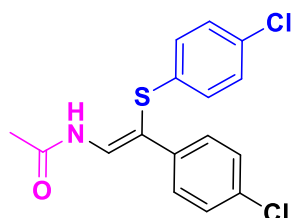

**(Z)-N-(2-(4-chlorophenyl)-2-((4-chlorophenyl)thio)vinyl)acetamide (3d)**

Eluent in chromatography: petroleum ether/ethyl acetate 5:1, **3d** was isolated as a pale yellow solid (m.p. 132-133°C) (38.4 mg, 57%);  $^1\text{H}$  NMR (400 MHz, Chloroform-*d*)  $\delta$  8.16 (br.d,  $J = 10.0$  Hz, 1H), 7.92 (d,  $J = 10.0$  Hz, 1H), 7.50 (d,  $J = 6.4$  Hz, 2H), 7.26-7.18 (m, 4H), 7.07 (d,  $J = 6.4$  Hz, 2H), 2.16 (s, 3H);  $^{13}\text{C}$  NMR (100 MHz, Chloroform-*d*)  $\delta$  167.8, 135.9, 133.5, 132.8, 132.3, 130.3, 129.6, 129.0, 128.4, 127.7, 110.7, 23.8; IR (KBr):  $\nu_{\text{max}}$  3161, 1681, 1624, 1472, 1400, 1293, 1229, 1091, 729; HRMS(ESI, *m/z*) calcd. for  $\text{C}_{16}\text{H}_{13}\text{Cl}_2\text{NNaOS}^+$   $[\text{M}+\text{Na}]^+$  359.9987, found 359.9994.

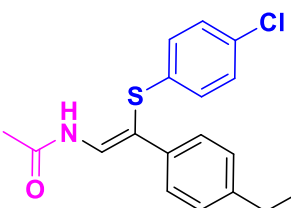

**(Z)-N-(2-((4-chlorophenyl)thio)-2-(4-ethylphenyl)vinyl)acetamide (3e)**

Eluent in chromatography: petroleum ether/ethyl acetate 5:1, **3e** was isolated as a yellow oily liquid (31.1 mg, 47%);  $^1\text{H}$  NMR (400 MHz, Chloroform-*d*)  $\delta$  8.13 (br.d,  $J = 10.8$  Hz, 1H), 7.92 (d,  $J = 10.8$  Hz, 1H), 7.48 (d,  $J = 8.0$  Hz, 2H), 7.18-7.08 (m, 6H), 2.60 (q,  $J = 7.2$  Hz, 2H), 2.14 (s, 3H), 1.20 (t,  $J = 7.2$  Hz, 3H);  $^{13}\text{C}$  NMR

(100 MHz, Chloroform-*d*)  $\delta$  167.7, 144.0, 134.7, 133.4, 131.9, 129.5, 129.4, 128.4, 128.1, 126.4, 111.6, 28.6, 23.8, 15.6; IR (KBr):  $\nu_{\max}$  3149, 1630, 1400, 1090, 656, 577; HRMS(ESI, *m/z*) calcd. for C<sub>18</sub>H<sub>18</sub>ClNNaOS<sup>+</sup> [M+Na]<sup>+</sup> 354.0690, found 354.0693.

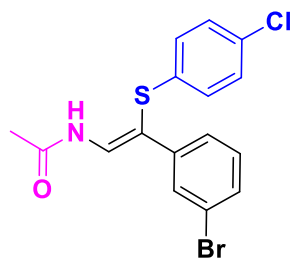

**(Z)-N-(2-(3-bromophenyl)-2-((4-chlorophenyl)thio)vinyl)acetamide (3f)**

Eluent in chromatography: petroleum ether/ethyl acetate 5:1, **3f** was isolated as a pale yellow solid (m.p. 82-83°C) (46.5 mg, 61%); <sup>1</sup>H NMR (400 MHz, Chloroform-*d*)  $\delta$  8.16 (br.d, *J* = 10.8 Hz, 1H), 7.93 (d, *J* = 10.8 Hz, 1H), 7.72 (s, 1H), 7.49 (d, *J* = 7.6 Hz, 1H), 7.33 (d, *J* = 7.6 Hz, 1H), 7.20-7.06 (m, 5H), 2.16 (s, 3H); <sup>13</sup>C NMR (100 MHz, Chloroform-*d*)  $\delta$  167.8, 139.7, 132.7, 132.3, 131.0, 130.7, 130.3, 129.6, 129.3, 128.3, 125.1, 123.1, 110.3, 23.8; IR (KBr):  $\nu_{\max}$  3120, 2050, 1630, 1475, 1401, 1244, 1093, 597; HRMS(ESI, *m/z*) calcd. for C<sub>16</sub>H<sub>13</sub>BrClNNaOS<sup>+</sup> [M+Na]<sup>+</sup> 403.9482, found 403.9488.

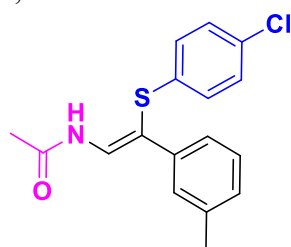

**(Z)-N-(2-((4-chlorophenyl)thio)-2-(m-tolyl)vinyl)acetamide (3g)**

Eluent in chromatography: petroleum ether/ethyl acetate 5:1, **3g** was isolated as a pale yellow solid (m.p. 56-57°C) (43.8 mg, 69%); <sup>1</sup>H NMR (400 MHz, Chloroform-*d*)  $\delta$  8.15 (br.d, *J* = 10.8 Hz, 1H), 7.93 (d, *J* = 10.8 Hz, 1H), 7.39-7.36 (m, 2H), 7.18-7.16 (m, 3H), 7.10-7.03 (m, 3H), 2.32 (s, 3H), 2.14 (s, 3H); <sup>13</sup>C NMR (100 MHz, Chloroform-*d*)  $\delta$  167.8, 138.5, 137.3, 133.4, 131.9, 129.9, 129.5, 128.7, 128.6, 128.1, 127.0, 123.8, 111.7, 23.8, 21.7; IR (KBr):  $\nu_{\max}$  3141, 1626, 1624, 1473, 1402, 1238, 1187, 1091, 699; HRMS(ESI, *m/z*) calcd. for C<sub>17</sub>H<sub>16</sub>ClNNaOS<sup>+</sup> [M+Na]<sup>+</sup> 340.0533, found 340.0540.

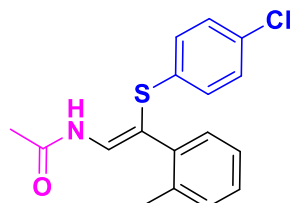

**(Z)-N-(2-((4-chlorophenyl)thio)-2-(o-tolyl)vinyl)acetamide (3h)**

Eluent in chromatography: petroleum ether/ethyl acetate 5:1, **3h** was isolated as a yellow solid (m.p. 78-79°C) (15.8 mg, 25%); <sup>1</sup>H NMR (400 MHz, Chloroform-*d*)  $\delta$  8.06 (br.d, *J* = 10.8 Hz, 1H), 7.42 (d, *J* = 10.8 Hz, 1H), 7.20-7.00 (m, 8H), 2.35 (s, 3H), 2.15 (s, 3H); <sup>13</sup>C NMR (100 MHz, Chloroform-*d*)  $\delta$  167.7, 137.5, 136.8, 132.9, 132.3, 131.0, 130.8, 130.5, 130.5, 129.3, 128.1, 125.8, 112.3, 23.8, 20.7; IR (KBr):  $\nu_{\max}$  3151, 2065, 1630, 1474, 1400, 1183, 1090, 1008, 606; HRMS(ESI, *m/z*) calcd. for C<sub>17</sub>H<sub>16</sub>ClNNaOS<sup>+</sup> [M+Na]<sup>+</sup> 340.0533, found 340.0538.

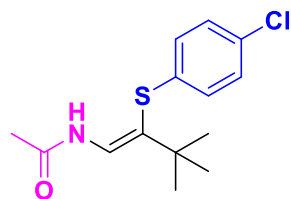

**(Z)-N-(2-((4-chlorophenyl)thio)-3,3-dimethylbut-1-en-1-yl)acetamide (3i)**

Eluent in chromatography: petroleum ether/ethyl acetate 5:1, **3i** was isolated as a colorless oily liquid (14.2 mg, 25%); <sup>1</sup>H NMR (400 MHz, Chloroform-*d*)  $\delta$  7.79 (br.d, *J* = 10.0 Hz, 1H), 7.53 (d, *J* = 10.8 Hz, 1H), 7.21 (d, *J* = 8.0 Hz, 2H), 7.06 (d, *J* = 8.0 Hz, 2H), 2.00 (s, 3H), 1.15 (s, 9H); <sup>13</sup>C NMR (100 MHz, Chloroform-*d*)  $\delta$  167.9, 134.3, 131.3, 129.4, 128.2, 127.2, 121.5, 38.0, 29.6, 23.7; IR (KBr):  $\nu_{\max}$  2970, 2056, 1632, 1474,



1400, 1296, 1239, 1172, 1092, 1011, 814, 592; HRMS(ESI,  $m/z$ ) calcd. for  $C_{14}H_{18}ClNNaOS^+$   $[M+Na]^+$  306.0690, found 306.0694.

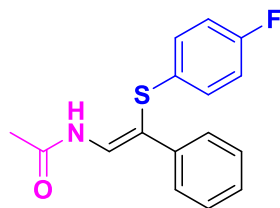

**(Z)-N-(2-((4-fluorophenyl)thio)-2-phenylvinyl)acetamide (3j)**

Eluent in chromatography: petroleum ether/ethyl acetate 5:1, **3j** was isolated as a pale brown solid (m.p. 125-126°C) (36.7 mg, 64%);  $^1H$  NMR (400 MHz, Chloroform- $d$ )  $\delta$  8.13 (br.d,  $J = 10.8$  Hz, 1H), 7.83 (d,  $J = 10.8$  Hz, 1H), 7.49 (d,  $J = 8.0$  Hz, 2H), 7.22-7.05 (m, 5H), 6.83 (t,  $J = 8.0$  Hz, 2H), 2.07 (s, 3H);  $^{13}C$  NMR (100 MHz, Chloroform- $d$ )  $\delta$  167.8, 161.6 (d,  $J = 244$  Hz), 137.5, 129.6, 129.5, 129.2 (d,  $J = 7.9$  Hz), 128.8, 127.7, 126.6, 116.5 (d,  $J = 22.1$  Hz), 112.6, 23.8;  $^{19}F$  NMR (Chloroform- $d$ )  $\delta$  -116.1; IR (KBr):  $\nu_{max}$  3154, 2055, 1630, 1488, 1401, 1244, 1085, 755, 628; HRMS(ESI,  $m/z$ ) calcd. for  $C_{16}H_{14}FNNaOS^+$   $[M+Na]^+$  310.0672, found 310.0679.

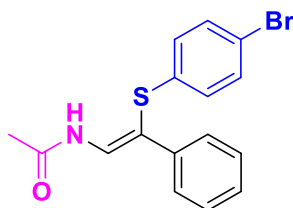

**(Z)-N-(2-((4-bromophenyl)thio)-2-phenylvinyl)acetamide (3k)**

Eluent in chromatography: petroleum ether/ethyl acetate 5:1, **3k** was isolated as a brown solid (m.p. 135-136°C) (40.9 mg, 59%);  $^1H$  NMR (400 MHz, Chloroform- $d$ )  $\delta$  8.16 (br.d,  $J = 11.2$  Hz, 1H), 7.95 (d,  $J = 11.2$  Hz, 1H), 7.57 (d,  $J = 8.0$  Hz, 2H), 7.32-7.20 (m, 5H), 7.03 (d,  $J = 8.0$  Hz, 2H), 2.14 (s, 3H);  $^{13}C$  NMR (100 MHz, Chloroform- $d$ )  $\delta$  167.8, 137.3, 133.9, 132.4, 130.1, 128.8, 128.5, 127.8, 126.5, 119.8, 111.5, 23.8; IR (KBr):  $\nu_{max}$  3182, 2066, 1629, 1469, 1401, 1082, 1052, 586; HRMS(ESI,  $m/z$ ) calcd. for  $C_{16}H_{14}BrNNaOS^+$   $[M+Na]^+$  369.9872, found 369.9875.

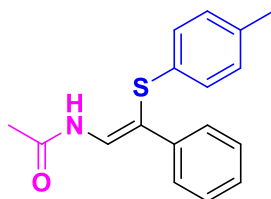

**(Z)-N-(2-phenyl-2-(p-tolylthio)vinyl)acetamide (3l)**

Eluent in chromatography: petroleum ether/ethyl acetate 5:1, **3l** was isolated as a yellow solid (m.p. 103-104°C) (39.6 mg, 70%);  $^1H$  NMR (400 MHz, Chloroform- $d$ )  $\delta$  8.23 (br.d,  $J = 10.8$  Hz, 1H), 7.92 (d,  $J = 10.8$  Hz, 1H), 7.60 (d,  $J = 8.0$  Hz, 2H), 7.29-7.18 (m, 3H), 7.08 (d,  $J = 8.0$  Hz, 2H), 7.02 (d,  $J = 8.0$  Hz, 2H), 6.78 (d,  $J = 8.0$  Hz, 1H), 2.26 (s, 3H), 2.13 (s, 3H);  $^{13}C$  NMR (100 MHz, Chloroform- $d$ )  $\delta$  167.8, 137.9, 136.1, 131.0, 130.1, 129.5, 128.7, 127.5, 127.2, 126.6, 112.6, 23.8, 21.1; IR (KBr):  $\nu_{max}$  3154, 2059, 1620, 1417, 1400, 1244, 1088, 769, 761, 600; HRMS(ESI,  $m/z$ ) calcd. for  $C_{17}H_{17}NNaOS^+$   $[M+Na]^+$  306.0923, found 306.0931.

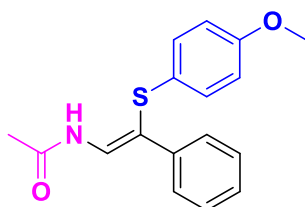

**(Z)-N-(2-((4-methoxyphenyl)thio)-2-phenylvinyl)acetamide (3m)**

Eluent in chromatography: petroleum ether/ethyl acetate 5:1, **3m** was isolated as a yellow oily liquid (22.7 mg, 38%);  $^1H$  NMR (400 MHz, Chloroform- $d$ )  $\delta$  8.25 (br.d,  $J = 10.8$  Hz, 1H), 7.84 (d,  $J = 10.8$  Hz, 1H), 7.57 (d,  $J = 8.0$  Hz, 2H), 7.28-7.17 (m, 3H), 7.12 (d,  $J = 8.0$  Hz, 2H), 6.75 (d,  $J = 8.0$  Hz, 2H), 3.73 (s, 3H), 2.14 (s, 3H);  $^{13}C$  NMR (100 MHz, Chloroform- $d$ )  $\delta$  167.8, 158.6, 137.8, 129.6, 128.7, 128.6, 127.5, 126.8, 124.9, 115.1, 113.9, 55.5, 23.8; IR (KBr):  $\nu_{max}$  3053, 2042, 1631, 1402, 1247, 1226, 1085, 590; HRMS(ESI,  $m/z$ ) calcd. for  $C_{17}H_{17}NNaO_2S^+$   $[M+Na]^+$  322.0872, found 322.0884.



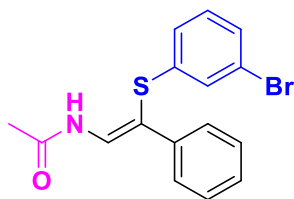

**(Z)-N-(2-((3-bromophenyl)thio)-2-phenylvinyl)acetamide (3o)**

Eluent in chromatography: petroleum ether/ethyl acetate 5:1, **3o** was isolated as a brown solid (m.p. 127-128°C) (52.1 mg, 75%); <sup>1</sup>H NMR (400 MHz, Chloroform-*d*) δ 8.09 (br.d, *J* = 11.2 Hz, 1H), 7.90 (d, *J* = 11.2 Hz, 1H), 7.50 (d, *J* = 8.0 Hz, 2H), 7.24-7.15 (m, 5H), 7.02-6.97 (m, 2H), 2.07 (s, 3H); <sup>13</sup>C NMR (100 MHz, Chloroform-*d*) δ 167.9, 137.4, 137.2, 130.7, 130.5, 129.3, 129.1, 128.9, 127.8, 126.5, 125.2, 123.3, 111.0, 23.8; IR (KBr): ν<sub>max</sub> 3155, 1629, 1455, 1400, 1233, 1081, 761, 691; HRMS(ESI, *m/z*) calcd. for C<sub>16</sub>H<sub>14</sub>BrNNaOS<sup>+</sup> [M+Na]<sup>+</sup> 369.9872, found 369.9872.

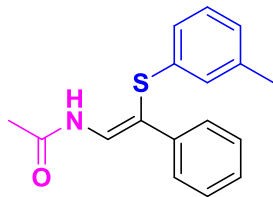

**(Z)-N-(2-phenyl-2-(m-tolylthio)vinyl)acetamide (3p)**

Eluent in chromatography: petroleum ether/ethyl acetate 5:1, **3p** was isolated as a yellow solid (m.p. 85-86°C) (38.5 mg, 68%); <sup>1</sup>H NMR (400 MHz, Chloroform-*d*) δ 8.21 (br.d, *J* = 10.8 Hz, 1H), 7.96 (d, *J* = 10.8 Hz, 1H), 7.60 (d, *J* = 8.0 Hz, 2H), 7.30-7.19 (m, 3H), 7.10 (t, *J* = 8.0 Hz, 2H), 7.00-6.91 (m, 3H), 2.26 (s, 3H), 2.13 (s, 3H); <sup>13</sup>C NMR (100 MHz, Chloroform-*d*) δ 167.8, 139.2, 137.9, 134.5, 129.8, 129.2, 128.7, 127.6, 127.4, 127.0, 126.5, 123.8, 112.0, 23.8, 21.6; IR (KBr): ν<sub>max</sub> 3160, 1620, 1466, 1401, 1230, 1079, 757, 687; HRMS(ESI, *m/z*) calcd. for C<sub>17</sub>H<sub>17</sub>NNaOS<sup>+</sup> [M+Na]<sup>+</sup> 306.0923, found 306.0930.

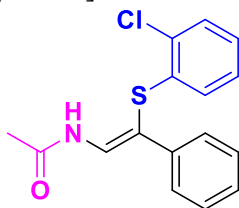

**(Z)-N-(2-((2-chlorophenyl)thio)-2-phenylvinyl)acetamide (3q)**

Eluent in chromatography: petroleum ether/ethyl acetate 5:1, **3q** was isolated as a yellow solid (m.p. 142-143°C) (37.0 mg, 61%); <sup>1</sup>H NMR (400 MHz, Chloroform-*d*) δ 8.18 (br.d, *J* = 10.8 Hz, 1H), 8.03 (d, *J* = 10.8 Hz, 1H), 7.61 (d, *J* = 8.0 Hz, 2H), 7.36-7.21 (m, 4H), 7.06-6.98 (m, 3H), 2.14 (s, 3H); <sup>13</sup>C NMR (100 MHz, Chloroform-*d*) δ 167.9, 137.4, 134.0, 132.0, 130.9, 129.9, 128.9, 127.8, 127.6, 127.3, 126.9, 126.4, 110.5, 23.8; IR (KBr): ν<sub>max</sub> 3155, 2043, 1625, 1400, 1241, 1096, 999, 600; HRMS(ESI, *m/z*) calcd. for C<sub>16</sub>H<sub>14</sub>ClNNaOS<sup>+</sup> [M+Na]<sup>+</sup> 326.0377, found 326.0386.

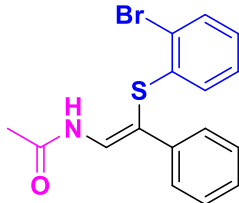

**(Z)-N-(2-((2-bromophenyl)thio)-2-phenylvinyl)acetamide (3r)**

Eluent in chromatography: petroleum ether/ethyl acetate 5:1, **3r** was isolated as a brown solid (m.p. 124-125°C) (52.0 mg, 75%); <sup>1</sup>H NMR (400 MHz, Chloroform-*d*) δ 8.11 (br.d, *J* = 10.8 Hz, 1H), 7.97 (d, *J* = 10.8 Hz, 1H), 7.53 (d, *J* = 8.0 Hz, 2H), 7.44 (d, *J* = 8.0 Hz, 1H), 7.23-7.15 (m, 3H), 7.02 (t, *J* = 8.0 Hz, 1H), 6.89 (t, *J* = 8.0 Hz, 2H), 2.06 (s, 3H); <sup>13</sup>C NMR (100 MHz, Chloroform-*d*) δ 167.9, 137.3, 136.0, 133.2, 130.8, 128.9, 128.2, 127.8, 127.2, 127.0, 126.3, 121.6, 111.1, 23.8; IR (KBr): ν<sub>max</sub> 3119, 2060, 1639, 1401, 1103, 597; HRMS(ESI, *m/z*) calcd. for C<sub>16</sub>H<sub>14</sub>BrNNaOS<sup>+</sup> [M+Na]<sup>+</sup> 369.9872, found 369.9879.

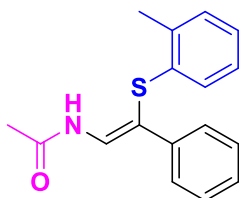

**(Z)-N-(2-phenyl-2-(o-tolylthio)vinyl)acetamide (3s)**

Eluent in chromatography: petroleum ether/ethyl acetate 5:1, **3s** was isolated as a yellow solid (m.p. 85-86°C) (36.2 mg, 64%); <sup>1</sup>H NMR (400 MHz, Chloroform-*d*) δ 8.17 (br.d, *J* = 10.8 Hz, 1H), 8.00 (d, *J* = 10.8 Hz, 1H), 7.59 (d, *J* = 8.0 Hz, 2H), 7.30-7.19 (m, 3H), 7.15 (d, *J* = 8.0 Hz, 1H), 7.05-6.95 (m, 3H), 2.45 (s, 3H), 2.13 (s, 3H); <sup>13</sup>C NMR (100 MHz, Chloroform-*d*) δ 167.8, 137.8, 135.7, 133.7, 130.5, 130.1, 128.7, 127.6, 126.9, 126.5, 125.9, 125.8, 111.5, 23.8, 20.3; IR (KBr): ν<sub>max</sub> 3122, 2042, 1629, 1400, 1087, 601; HRMS(ESI, *m/z*) calcd. for C<sub>17</sub>H<sub>17</sub>NNaOS<sup>+</sup> [M+Na]<sup>+</sup> 306.0923, found 306.0931.

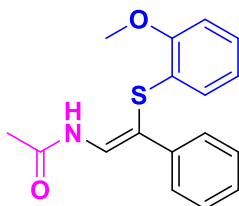

**(Z)-N-(2-((2-methoxyphenyl)thio)-2-phenylvinyl)acetamide (3t)**

Eluent in chromatography: petroleum ether/ethyl acetate 5:1, **3t** was isolated as a yellow solid (m.p. 105-106°C) (31.1 mg, 52%); <sup>1</sup>H NMR (400 MHz, Chloroform-*d*) δ 8.28 (br.d, *J* = 10.8 Hz, 1H), 7.97 (d, *J* = 10.8 Hz, 1H), 7.62 (d, *J* = 8.0 Hz, 2H), 7.30-7.19 (m, 3H), 7.12 (t, *J* = 8.0 Hz, 1H), 6.96 (d, *J* = 8.0 Hz, 1H), 6.86 (d, *J* = 8.0 Hz, 1H), 6.78 (d, *J* = 8.0 Hz, 1H), 3.94 (s, 3H), 2.11 (s, 3H); <sup>13</sup>C NMR (100 MHz, Chloroform-*d*) δ 167.8, 156.4, 138.0, 130.3, 128.7, 127.6, 127.5, 127.1, 126.5, 123.0, 121.7, 111.1, 110.7, 56.1, 23.8; IR (KBr): ν<sub>max</sub> 3034, 2035, 1629, 1400, 1240, 1193, 1076, 602; HRMS(ESI, *m/z*) calcd. for C<sub>17</sub>H<sub>17</sub>NNaO<sub>2</sub>S<sup>+</sup> [M+Na]<sup>+</sup> 322.0872, found 322.0881.

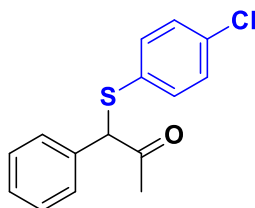

**1-((4-chlorophenyl)thio)-1-phenylpropan-2-one (3u')<sup>11</sup>**

Eluent in chromatography: petroleum ether/ethyl acetate 10:1, **3u'** was isolated as a yellow oily liquid (19.3 mg, 35%); <sup>1</sup>H NMR (400 MHz, Chloroform-*d*) δ 8.28 (br.d, *J* = 10.8 Hz, 1H), 7.97 (d, *J* = 10.8 Hz, 1H), 7.62 (d, *J* = 8.0 Hz, 2H), 7.32-7.19 (m, 9H), 4.94 (s, 1H), 2.18 (s, 3H). The analytic data is in accordance with literature.

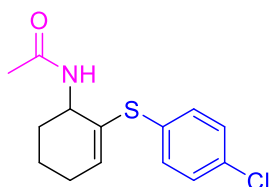

**N-(2-((4-chlorophenyl)thio)cyclohex-2-en-1-yl)acetamide (3v)**

Eluent in chromatography: petroleum ether/ethyl acetate 2:1, **3v** was isolated as a yellow oily liquid (39.9 mg, 71%); <sup>1</sup>H NMR (400 MHz, Chloroform-*d*) δ 7.26-7.24 (m, 4H), 6.22 (t, *J* = 3.6 Hz, 1H), 5.58 (br.d, *J* = 80 Hz, 1H), 4.42-4.38 (m, 1H), 2.19-2.15 (m, 2H), 1.90 (s, 3H), 1.83-1.72 (m, 2H), 1.70-1.65 (m, 1H), 1.59-1.49 (m, 1H); <sup>13</sup>C NMR (100 MHz, Chloroform-*d*) δ 169.5, 137.6, 133.5, 132.8, 132.6, 132.4, 129.5, 47.0, 30.3, 27.0, 23.5, 18.0; IR (KBr): ν<sub>max</sub> 3258, 1901, 1641, 1548, 1474, 1092, 1012, 818, 495.

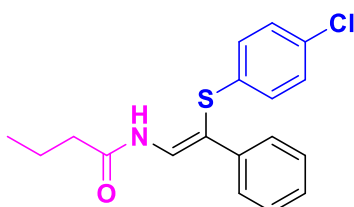

**(Z)-N-(2-((4-chlorophenyl)thio)-2-phenylvinyl)butyramide (4a)**

Eluent in chromatography: petroleum ether/ethyl acetate 5:1, **4a** was isolated as a pale yellow solid (m.p. 66-67°C) (47.0 mg, 71%); <sup>1</sup>H NMR (400 MHz, Chloroform-*d*) δ 8.13 (br.d, *J* = 10.8 Hz, 1H), 7.96 (d, *J* = 10.8 Hz, 1H), 7.57 (d, *J* = 8.0 Hz, 2H), 7.30-7.21 (m, 3H), 7.17 (d, *J* = 8.0 Hz, 2H), 7.09 (d, *J* = 8.0 Hz, 2H), 2.31 (t, *J* = 7.2 Hz, 2H), 1.72-1.67 (m, 2H), 0.96 (t, *J* = 7.2 Hz, 3H); <sup>13</sup>C NMR (100 MHz, Chloroform-*d*) δ 170.7, 137.5, 133.3, 132.0, 130.0, 129.5, 128.8, 128.2, 127.7, 126.5, 111.5, 38.8, 18.9, 13.9; IR (KBr): ν<sub>max</sub> 3155, 2054, 1621, 1474, 1401, 1204, 1093, 1011, 805, 759, 695; HRMS(ESI, *m/z*) calcd. for C<sub>18</sub>H<sub>18</sub>ClNNaOS<sup>+</sup> [M+Na]<sup>+</sup> 354.0690, found 354.0698.

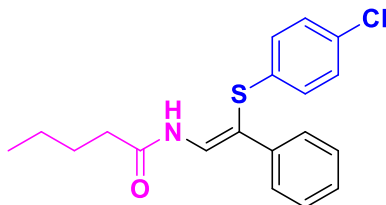**(Z)-N-(2-((4-chlorophenyl)thio)-2-phenylvinyl)pentanamide (4b)**

Eluent in chromatography: petroleum ether/ethyl acetate 5:1, **4b** was isolated as a pale yellow solid (m.p. 80-81°C) (32.5 mg, 47%); <sup>1</sup>H NMR (400 MHz, Chloroform-*d*) δ 8.12 (br.d, *J* = 10.8 Hz, 1H), 7.95 (d, *J* = 10.8 Hz, 1H), 7.57 (d, *J* = 8.0 Hz, 2H), 7.30-7.21 (m, 3H), 7.17 (d, *J* = 8.0 Hz, 2H), 7.09 (d, *J* = 8.0 Hz, 2H), 2.32 (t, *J* = 7.2 Hz, 2H), 1.67-1.60 (m, 2H), 1.39-1.32 (m, 2H), 0.91 (t, *J* = 7.2 Hz, 3H); <sup>13</sup>C NMR (100 MHz, Chloroform-*d*) δ 170.9, 137.5, 133.3, 132.0, 130.0, 129.5, 128.8, 128.2, 127.7, 126.5, 111.5, 36.7, 27.5, 22.5, 14.0; IR (KBr): ν<sub>max</sub> 3191, 2055, 1633, 1470, 1401, 1195, 1091, 594; HRMS(ESI, *m/z*) calcd. for C<sub>19</sub>H<sub>20</sub>ClNNaOS<sup>+</sup> [M+Na]<sup>+</sup> 368.0846, found 368.0850.

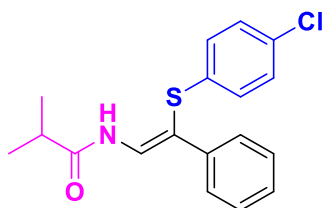**(Z)-N-(2-((4-chlorophenyl)thio)-2-phenylvinyl)isobutyramide (4c)**

Eluent in chromatography: petroleum ether/ethyl acetate 5:1, **4c** was isolated as a pale yellow solid (m.p. 73-74°C) (25.8 mg, 39%); <sup>1</sup>H NMR (400 MHz, Chloroform-*d*) δ 8.17 (br.d, *J* = 10.8 Hz, 1H), 7.94 (d, *J* = 10.8 Hz, 1H), 7.57 (d, *J* = 8.0 Hz, 2H), 7.30-7.21 (m, 3H), 7.17 (d, *J* = 8.0 Hz, 2H), 7.10 (d, *J* = 8.0 Hz, 2H), 2.53-2.43 (m, 1H), 1.20-1.18 (d, *J* = 8.0 Hz, 6H); <sup>13</sup>C NMR (100 MHz, Chloroform-*d*) δ 174.6, 137.6, 133.3, 132.0, 130.1, 129.5, 128.8, 128.3, 127.7, 126.5, 111.8, 36.0, 19.5; IR (KBr): ν<sub>max</sub> 3096, 2077, 1632, 1401, 1200, 1090, 688, 589; HRMS(ESI, *m/z*) calcd. for C<sub>18</sub>H<sub>18</sub>ClNNaOS<sup>+</sup> [M+Na]<sup>+</sup> 354.0690, found 354.0697.

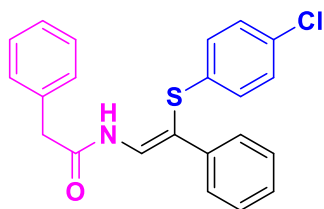**(Z)-N-(2-((4-chlorophenyl)thio)-2-phenylvinyl)-2-phenylacetamide (4d)**

Eluent in chromatography: petroleum ether/ethyl acetate 5:1, **4d** was isolated as a pale yellow oily liquid (15.9 mg, 21%); <sup>1</sup>H NMR (400 MHz, Chloroform-*d*) δ 8.10 (br.d, *J* = 10.8 Hz, 1H), 7.88 (d, *J* = 11.2 Hz, 1H), 7.53 (d, *J* = 8.0 Hz, 2H), 7.36-7.09 (m, 10H), 6.92 (d, *J* = 8.0 Hz, 2H), 3.68 (s, 2H); <sup>13</sup>C NMR (100 MHz, Chloroform-*d*) δ 168.6, 137.6, 133.5, 133.1, 131.9, 129.6, 129.5, 129.4, 129.3, 128.8, 128.2, 128.0, 127.8, 126.5, 112.8, 44.0; IR (KBr): ν<sub>max</sub> 3075, 2056, 1625, 1460, 1401, 1091, 1049, 815, 758, 696; HRMS(ESI, *m/z*) calcd. for C<sub>22</sub>H<sub>18</sub>ClNNaOS<sup>+</sup> [M+Na]<sup>+</sup> 402.0690, found 402.0697.

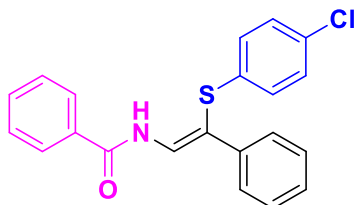

### (Z)-N-(2-((4-chlorophenyl)thio)-2-phenylvinyl)benzamide (4e)

Eluent in chromatography: petroleum ether/ethyl acetate 5:1, **4e** was isolated as a brown solid (m.p. 105-106°C) (25.6 mg, 35%); <sup>1</sup>H NMR (400 MHz, Chloroform-*d*) δ 9.05 (br.d, *J* = 10.8 Hz, 1H), 8.26 (d, *J* = 11.2 Hz, 1H), 7.90 (d, *J* = 8.0 Hz, 2H), 7.73 (d, *J* = 8.0 Hz, 2H), 7.66 (t, *J* = 8.0 Hz, 1H), 7.57 (t, *J* = 8.0 Hz, 2H), 7.41 (t, *J* = 8.0 Hz, 2H), 7.35-7.24 (m, 5H); <sup>13</sup>C NMR (100 MHz, Chloroform-*d*) δ 164.4, 137.4, 133.1, 133.0, 132.8, 132.2, 130.2, 129.5, 129.1, 128.9, 128.5, 127.9, 127.5, 126.6, 113.2; IR (KBr): ν<sub>max</sub> 3016, 2053, 1634, 1401, 1086, 699, 579; HRMS(ESI, *m/z*) calcd. for C<sub>21</sub>H<sub>16</sub>ClNNaOS<sup>+</sup> [M+Na]<sup>+</sup> 388.0533, found 388.0538.

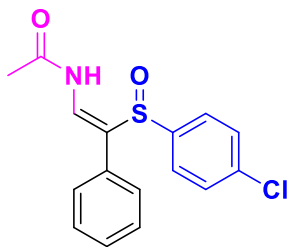

### (Z)-N-(2-((4-chlorophenyl)sulfinyl)-2-phenylvinyl)acetamide (5a)

Eluent in chromatography: petroleum ether/ethyl acetate 5:1, **5a** was isolated as a pale yellow solid (52.3 mg, 82%); <sup>1</sup>H NMR (400 MHz, Chloroform-*d*) δ 10.95 (br.d, *J* = 10.0 Hz, 1H), 7.59 (d, *J* = 10.4 Hz, 1H), 7.44-7.23 (m, 9H), 2.16 (s, 3H); <sup>13</sup>C NMR (100 MHz, Chloroform-*d*) δ 167.9, 141.4, 138.0, 133.1, 130.1, 129.8, 129.3, 128.7, 128.0, 126.6, 119.8, 23.8; IR (KBr): ν<sub>max</sub> 3050, 2924, 2358, 1707, 1631, 1474, 1369, 1242, 1089, 1010, 821, 763, 698, 597; HRMS(ESI, *m/z*) calcd. for C<sub>16</sub>H<sub>15</sub>ClNO<sub>2</sub>S<sup>+</sup> [M+H]<sup>+</sup> 320.0507, found 320.0491.

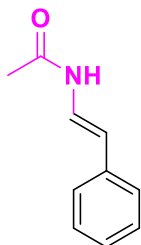

### (E)-N-styrylacetamide (5b)<sup>12</sup>

Eluent in chromatography: petroleum ether/ethyl acetate 2:1, **5b** was isolated as a light yellow solid (36.2 mg, 75%); <sup>1</sup>H NMR (400 MHz, Chloroform-*d*) δ 7.71 (br.d, *J* = 4.8 Hz, 1H), 7.52-7.48 (m, 1H), 7.31-7.25 (m, 4H), 7.19-7.15 (m, 1H), 6.10 (d, *J* = 14.4 Hz, 1H), 2.11 (s, 3H); <sup>13</sup>C NMR (100 MHz, Chloroform-*d*) δ 167.8, 136.2, 128.9, 126.8, 125.7, 122.9, 112.7, 23.5.

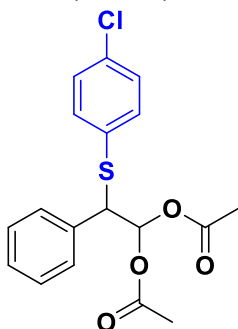

### 2-((4-chlorophenyl)thio)-2-phenylethane-1,1-diyl diacetate (6)<sup>13</sup>

Eluent in chromatography: petroleum ether/ethyl acetate 10:1, **6** was isolated as an oily liquid (40.8 mg, 56%); <sup>1</sup>H NMR (400 MHz, Chloroform-*d*) δ 7.32-7.20 (m, 9H), 7.14 (d, *J* = 5.6 Hz, 1H), 4.47 (d, *J* = 5.6 Hz, 1H), 1.99 (s, 3H), 1.97 (s, 3H). The analytic data is in accordance with literature.

## References

1. J. Wang, M. Liu, Y. Zhang, G. Bi, Y. Zhao, K. Yang and X. Huang, Switchable Synthesis of Sulfoxides and  $\alpha$ -Alkoxy- $\beta$ -ketothioethers Regulated by Temperature in a Selectfluor-Methanol System, *J. Org. Chem.* 2021, **86**, 14404.
2. D. R. Williams, M. W. Fultz, T. E. Christos and J. S. Carter, A general preparation of (*Z*)-1-fluorostilbene derivatives for the design of conformationally restricted peptidomimetics, *Tetrahedron Lett.* 2010, **51**, 121.
3. H.-L. Kao and C.-F. Lee, Efficient copper-catalyzed S-vinylation of thiols with vinyl halides, *Org. Lett.* 2011, **13**, 5204.
4. J. Wang, Y. Zhuang, B. Yu, X. Wang, G. Bi, X. Huang and W. Zhang, Tf<sub>2</sub>O-Mediated Direct Synthesis of

- 4-Sulfenylated Oxazoles from  $\beta$ -Keto Sulfoxides and Nitriles, *J. Org. Chem.* 2022, **87**, 14870.
- D. J. Meyers and P. L. Fuchs, Economical and Environmentally Friendly Syntheses of 2-(Phenylsulfonyl)-1, 3-cyclohexadiene and 2-(Phenylsulfonyl)-1, 3-cycloheptadiene<sup>1</sup>, *J. Org. Chem.* 2002, **67**, 200.
  - H.-L. Yue and M. Klussmann, Acid-catalyzed oxidative addition of thiols to olefins and alkynes for a one-pot entry to sulfoxides, *Synlett* 2016, **27**, 2505.
  - F. Gelat, J. F. Lohier, A. C. Gaumont and S. Perrio, tert-Butyl Sulfoxides: Key Precursors for Palladium-Catalyzed Arylation of Sulfenate Salts, *Adv. Synth. Catal.* 2015, **357**, 2011.
  - J. Kumar, A. Ahmad, M. A. Rizvi, M. A. Ganie, C. Khajuria and B. A. Shah, Photoredox-mediated synthesis of functionalized sulfoxides from terminal alkynes, *Org. Lett.* 2020, **22**, 5661.
  - R. R. Strickler, J. M. Motto, C. C. Humber and A. L. Schwan, Stereospecific Grignard reactions of cholesteryl 1-alkenesulfinate esters: Application of the Andersen Protocol to the preparation of non-racemic  $\alpha$ ,  $\beta$ -unsaturated sulfoxides, *Can. J. Chem.* 2003, **81**, 423-430.
  - P. Zhong, M.-P. Guo and X. Huang, Simple and stereoselective synthetic route to (E)-1-alkenyl sulfoxides via terminal alkynes, *J. Chem. Research (S)*. 2000, **2000**, 588.
  - R. Ma, J. Feng, K. Zhang, B. Zhang and D. Du, Photoredox  $\beta$ -thiol- $\alpha$ -carbonylation of enones accompanied by unexpected Csp<sup>2</sup>-C (CO) bond cleavage, *Org. Biomol. Chem.* 2020, **18**, 7549.
  - Ritu, D. Kolb, N. Jain and B. Koenig, Synthesis of Linear Enamides and Enecarbamates via Photoredox Acceptorless Dehydrogenation, *Adv. Synth. Catal.* 2023, **365**, 605.
  - D. Craig, K. Daniels and A. R. MacKenzie, Additive Pummerer reactions of vinylic sulfoxides. Synthesis of  $\gamma$ -hydroxy- $\alpha$ ,  $\beta$ -unsaturated esters,  $\alpha$ -hydroxyketones, and 2-phenylsulfenyl aldehydes and primary alcohols, *Tetrahedron* 1993, **49**, 11263.

## 5 Density functional theory (DFT) calculations

All geometry optimizations and frequency calculations were conducted in Gaussian 09 package with the B3LYP functional and 6-311G (d, p) basis set level. The unit of the energies was kcal mol<sup>-1</sup> and the 3D pictures were drawn by using CYLview 20 software (CYLview20; Legault, C. Y., Université de Sherbrooke, 2020. <http://www.cylview.org>). The acetonitrile solvent corrections were included into all calculations using the SMD solvation model. The Gibbs free energies and Thermal Enthalpies of the organics were calculated. The Grimme's D3BJ dispersion correction was considered in the electronic energy calculations.

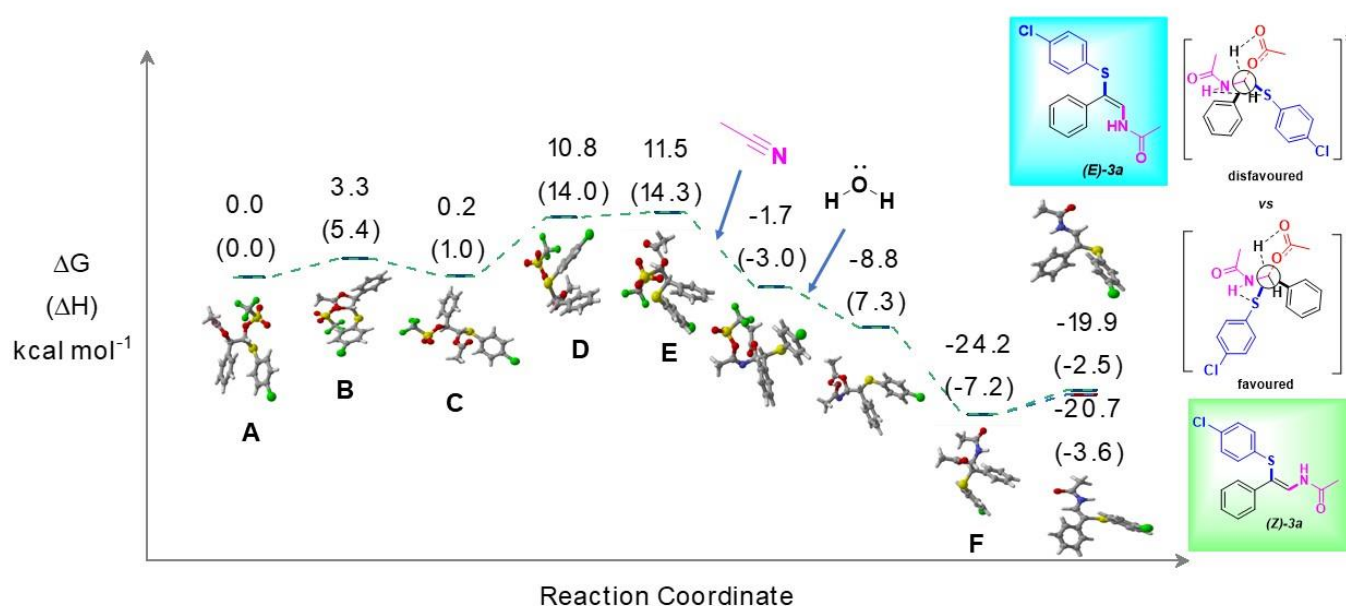

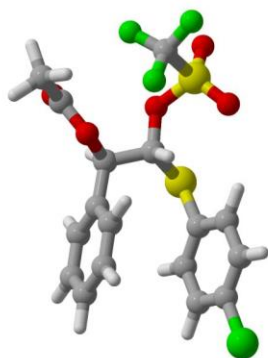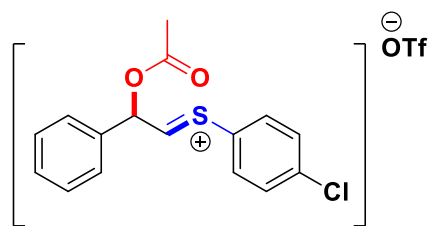

A

C -1.85799000 1.54967500 1.65162900  
 C -2.12031400 1.43120500 0.28200300  
 C -3.42280900 1.17428600 -0.15514800  
 C -4.45641500 1.02731700 0.77040200  
 C -4.19312100 1.14504400 2.13623200  
 C -2.89332200 1.41003900 2.57472300  
 H -0.84729200 1.75287200 1.99041200  
 H -3.62415600 1.08473200 -1.21848400  
 H -5.46540200 0.82544300 0.42430900  
 H -4.99774500 1.03361700 2.85672200  
 H -2.68528600 1.50484100 3.63611500  
 C -0.99340900 1.52093600 -0.72182500  
 H -1.37921600 1.76900100 -1.71381500  
 C -0.21484000 0.19670100 -0.81305300  
 H 0.19862600 -0.07039900 0.15925700  
 S 1.15718400 0.23015000 -2.03155300  
 C 2.56202900 0.00927500 -0.93976000  
 C 3.26239900 -1.20147400 -0.96477800  
 C 2.97566000 1.04451200 -0.09225700  
 C 4.37551300 -1.38419000 -0.14542100  
 H 2.93804400 -2.00486200 -1.61614700  
 C 4.07721700 0.86387300 0.74214400  
 H 2.43484800 1.98352100 -0.07373300  
 C 4.76390800 -0.34833700 0.70118000  
 H 4.92204500 -2.32002300 -0.16050700  
 H 4.39882400 1.65805800 1.40609800  
 Cl 6.16237300 -0.57663300 1.75013600  
 O 0.00930200 2.46062100 -0.30828100  
 C -0.09964400 3.79827600 -0.55383000  
 O 0.80603400 4.50180600 -0.16478200

C -1.31158900 4.29170400 -1.29299300  
 H -1.28541900 5.38057100 -1.30946800  
 H -1.30349500 3.91800800 -2.32240100  
 H -2.23500300 3.94874600 -0.81939000  
 O -1.20437400 -0.78630800 -1.23396800  
 S -1.02602700 -2.32963500 -0.76859100  
 O -1.41041200 -3.16680700 -1.89241800  
 O 0.22522600 -2.51496200 -0.04590800  
 C -2.41041000 -2.40847400 0.48468000  
 F -2.13596500 -1.58074100 1.48788800  
 F -3.55673400 -2.06585000 -0.09229700  
 F -2.48414900 -3.65858700 0.93666700

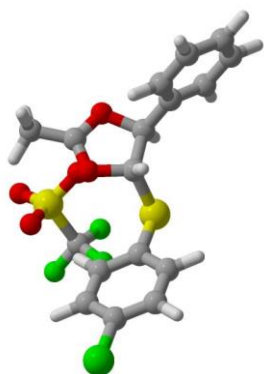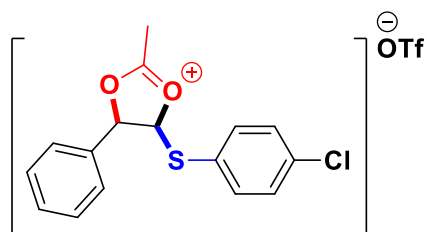

**B**

C -6.73514000 -0.84891100 0.47143800  
 C -6.39647300 -0.38636000 -0.80049600  
 C -5.07717300 -0.03149000 -1.08422300  
 C -4.09373800 -0.15182000 -0.09824800  
 C -4.43427600 -0.61959400 1.17818400  
 C -5.75390600 -0.96211100 1.46115500  
 H -7.76216200 -1.12117000 0.69417000  
 H -7.15649700 -0.29657800 -1.57002500  
 H -4.80682300 0.33444200 -2.07012900  
 H -3.67684900 -0.71267500 1.95153100  
 H -6.01740700 -1.31935100 2.45147000  
 C -2.68208600 0.21298300 -0.43349100  
 C -1.61547800 -0.87690200 -0.17652600  
 H -2.60884400 0.63465300 -1.43580000  
 C -1.15627200 0.92864800 1.10478500  
 H -2.00858300 -1.77956600 0.28747100



O -2.21224700 1.30743800 0.47515200  
 O -0.74901500 -0.27018300 0.85150300  
 S -0.68444200 -1.26345800 -1.69233100  
 C -0.56734200 1.72630600 2.18645500  
 H -1.23933300 1.64912000 3.05001800  
 H 0.41372900 1.33297000 2.44316300  
 H -0.49052400 2.76916700 1.87535300  
 O 0.45852100 1.82775500 -0.62355800  
 S 1.34156800 3.02384700 -0.51047600  
 O 1.77876400 3.59446400 -1.79854600  
 O 0.91822800 3.99906100 0.52018500  
 C 2.90258300 2.30312700 0.19857300  
 F 3.78652800 3.26829900 0.49270900  
 F 2.65057700 1.60890000 1.32384400  
 F 3.48467800 1.46000900 -0.67692000  
 C 0.72426400 -2.10432600 -0.97091000  
 C 1.83789600 -1.33248800 -0.62326500  
 C 0.72621900 -3.48726700 -0.76823900  
 C 2.95920700 -1.93726700 -0.06154200  
 H 1.81841100 -0.26367500 -0.78776900  
 C 1.84506200 -4.10190600 -0.20680000  
 H -0.13694300 -4.08435500 -1.04169100  
 C 2.94407600 -3.31661800 0.13955500  
 H 3.82137300 -1.34104700 0.21414100  
 H 1.85967900 -5.17302500 -0.04220800  
 Cl 4.35659700 -4.09307700 0.85130600

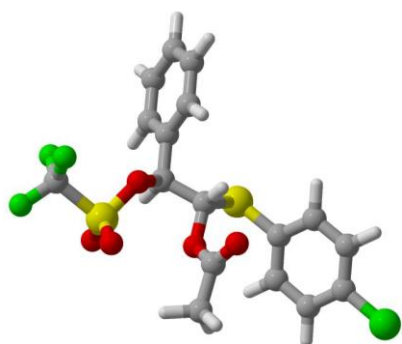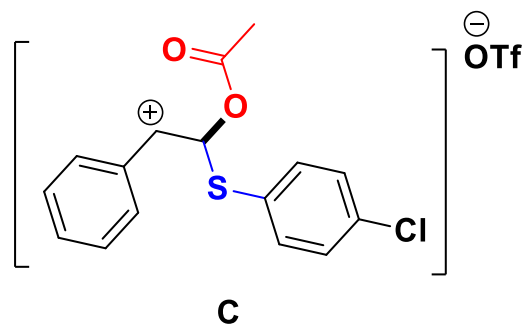

C -2.38049000 4.42348800 0.30972300  
 C -2.71686900 3.56868500 -0.74032000

C -2.34369200 2.22394600 -0.70224000  
C -1.63314700 1.72984000 0.39486600  
C -1.30464400 2.58511500 1.45362300  
C -1.67338300 3.92822500 1.40824100  
H -2.67211500 5.46866600 0.27639400  
H -3.27192700 3.94545400 -1.59385200  
H -2.61456100 1.56378900 -1.51745000  
H -0.76437600 2.19672500 2.31234200  
H -1.41576900 4.58492900 2.23335900  
C -1.18295700 0.29242900 0.48083200  
H -1.45816000 -0.13891200 1.44600200  
C 0.32647500 0.09755400 0.33205200  
H 0.81977200 0.66154500 1.12153500  
S 0.93531300 0.74294500 -1.28808000  
C 2.68222000 0.49674500 -0.97545900  
C 3.27537000 -0.73928200 -1.25700900  
C 3.44511700 1.52605000 -0.41146700  
C 4.62073200 -0.95647700 -0.96211900  
H 2.68653900 -1.53732800 -1.69448900  
C 4.79194300 1.32180700 -0.11672000  
H 2.98650700 2.48409800 -0.19166600  
C 5.35912500 0.07850200 -0.39257400  
H 5.08225300 -1.91468300 -1.17089600  
H 5.38666500 2.11415300 0.32299300  
Cl 7.05846700 -0.18997900 -0.01053200  
O 0.59117800 -1.29649700 0.42781600  
C 1.49234200 -1.83317800 1.31285600  
O 1.68175500 -3.02465000 1.23813600  
C 2.15333700 -0.92989500 2.31820400  
H 2.74653900 -0.15257900 1.82977600  
H 1.40661000 -0.44032500 2.95141300  
H 2.80576900 -1.54280800 2.93883400  
O -1.81493600 -0.49318300 -0.58082700  
S -2.71284500 -1.77844600 -0.21391300  
O -2.65617800 -2.66580400 -1.36230500  
O -2.46433300 -2.24192800 1.14405400

C -4.39085000 -0.96169300 -0.20847800  
F -5.31379500 -1.88061000 0.06152700  
F -4.40333700 -0.01679900 0.73138000  
F -4.62740600 -0.41700500 -1.39873100

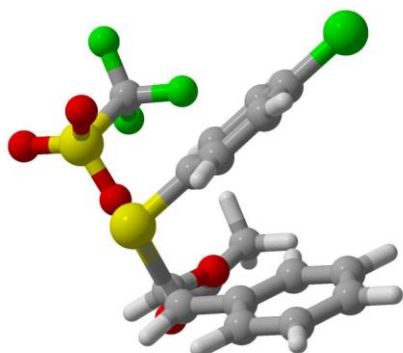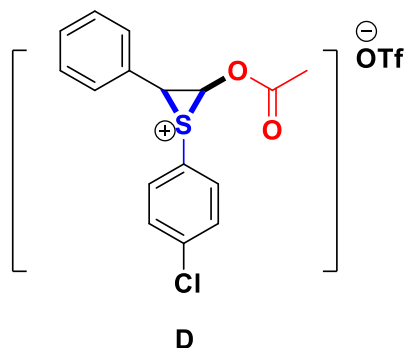

C -4.98327700 -2.85843900 1.38925500  
C -5.63085300 -1.65775000 1.68377400  
C -5.04607700 -0.44161300 1.32092800  
C -3.82256000 -0.41802200 0.65722300  
C -3.17160800 -1.62502100 0.35137400  
C -3.75438400 -2.84287700 0.73356800  
H -5.43002700 -3.80581500 1.67299400  
H -6.58617800 -1.66764900 2.19904300  
H -5.54419800 0.49355600 1.55530800  
H -3.38415100 0.53349500 0.38314200  
H -3.24353300 -3.77380200 0.50747600  
C -1.86889000 -1.69966400 -0.34814700  
C -1.37867500 -0.74107300 -1.34291700  
H -1.49258500 -2.70901900 -0.48943100  
H -0.65515700 -1.09305000 -2.07356000  
S -0.45935600 -0.61106900 0.39026400  
C 1.07178700 -1.51905700 0.16203700  
C 2.14924500 -1.03153100 0.91086800  
C 1.21562500 -2.61664900 -0.68905500  
C 3.38896100 -1.65617200 0.80602100  
H 2.02213000 -0.17159600 1.56087700  
C 2.45898100 -3.23641800 -0.79431900  
H 0.39579500 -3.00803400 -1.27846000  
C 3.52885400 -2.74982000 -0.04591100

H 4.23154400 -1.28886000 1.38013800  
 H 2.58496900 -4.08755700 -1.45285900  
 Cl 5.09432500 -3.53766500 -0.18065800  
 O -2.15862400 0.30824900 -1.66427900  
 C -1.78367600 1.27609600 -2.63370600  
 O -2.54965400 2.18794300 -2.75176800  
 C -0.53231700 1.03424500 -3.41424000  
 H 0.33954600 0.97118300 -2.75983400  
 H -0.60925100 0.10084500 -3.98107600  
 H -0.40608500 1.86588000 -4.10617900  
 O 0.91955000 1.63617000 2.12155000  
 S 1.39825500 2.90669200 1.51343400  
 O 0.64537300 4.11199400 1.91829900  
 O 2.86825200 3.05089800 1.45235800  
 C 0.92908700 2.70129900 -0.27244500  
 F 1.29790200 3.75801400 -1.00938400  
 F 1.52162200 1.60489500 -0.79895900  
 F -0.40499600 2.54637300 -0.40951000

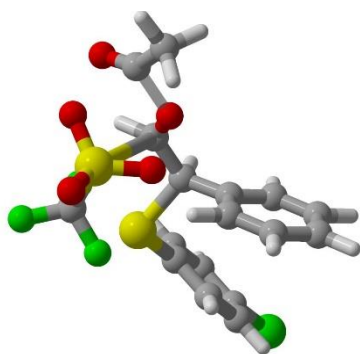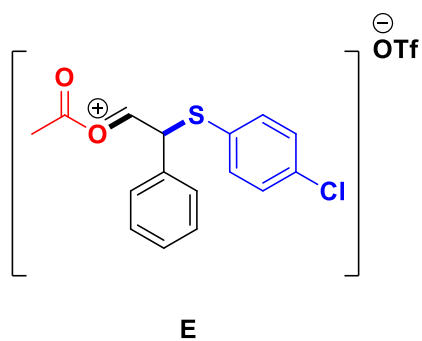

|   |             |             |             |
|---|-------------|-------------|-------------|
| C | 3.88219200  | 2.09122500  | 1.93493100  |
| H | 3.87491200  | 2.15476600  | 0.84536400  |
| H | 3.39618300  | 2.98242000  | 2.34982500  |
| H | 4.89352800  | 1.99116600  | 2.32781100  |
| C | 0.80782200  | 0.20763300  | 1.70621000  |
| H | 1.00899700  | -0.59261500 | 2.42539500  |
| C | -0.51740300 | 0.29380500  | 1.06870000  |
| H | -1.18474900 | 0.35716400  | 1.94308700  |
| C | -0.76029000 | 1.42640800  | 0.11559200  |
| C | 0.04170800  | 1.60302600  | -1.02009900 |
| C | -1.85407300 | 2.27048900  | 0.33352700  |
| C | -0.24573700 | 2.62980500  | -1.91627400 |
| H | 0.88544200  | 0.94754100  | -1.20367700 |
| C | -2.14108700 | 3.29502600  | -0.57012300 |
| H | -2.48237300 | 2.11915900  | 1.20626300  |
| C | -1.33650600 | 3.47663700  | -1.69494600 |
| H | 0.38204700  | 2.76800700  | -2.79122600 |
| H | -2.99306800 | 3.94460200  | -0.39546500 |

|    |             |             |             |
|----|-------------|-------------|-------------|
| H  | -1.55825100 | 4.27215800  | -2.39980600 |
| S  | -0.94595800 | -1.40350100 | 0.34824700  |
| C  | -2.71129400 | -1.15164800 | 0.22945900  |
| C  | -3.24680100 | -0.59659600 | -0.93914900 |
| C  | -3.55348500 | -1.49990300 | 1.29187300  |
| C  | -4.62002500 | -0.38617400 | -1.04949800 |
| H  | -2.59362700 | -0.32274300 | -1.75958100 |
| C  | -4.92758900 | -1.29281700 | 1.19210200  |
| H  | -3.13873300 | -1.92962400 | 2.19731800  |
| C  | -5.44040300 | -0.73621800 | 0.02078100  |
| H  | -5.03998900 | 0.04640500  | -1.95013100 |
| H  | -5.58625200 | -1.56016800 | 2.01024300  |
| Cl | -7.17657900 | -0.46830900 | -0.10875300 |
| O  | 3.25529200  | 0.91389800  | -1.08788300 |
| S  | 4.05645200  | -0.31733400 | -0.87951500 |
| O  | 4.95248200  | -0.69094300 | -1.99112300 |
| O  | 4.63286400  | -0.44237900 | 0.48308400  |
| C  | 2.76953500  | -1.66149000 | -0.88797100 |
| F  | 1.89417400  | -1.50040800 | -1.89086300 |
| F  | 3.32553600  | -2.87434400 | -0.99998700 |
| F  | 2.06912400  | -1.64745100 | 0.27630700  |

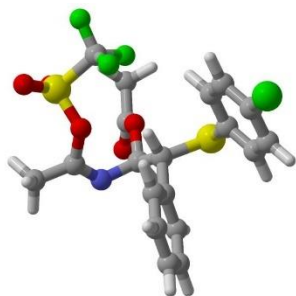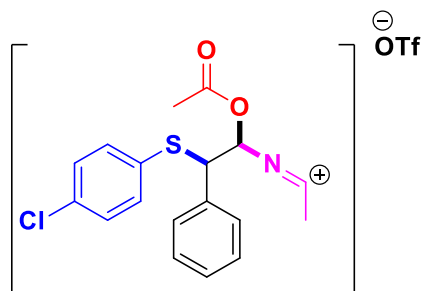

|   |             |             |             |
|---|-------------|-------------|-------------|
| C | -2.37375600 | -3.19131300 | -0.71394200 |
| O | -3.04663500 | -3.28893300 | 0.29123100  |
| C | -2.55747900 | -3.97069800 | -1.98268500 |
| H | -2.79927400 | -3.28529300 | -2.80112300 |
| H | -1.62695100 | -4.48292900 | -2.24420400 |
| H | -3.36211700 | -4.69461800 | -1.85710300 |
| O | -1.32782200 | -2.33051600 | -0.82674700 |
| C | -1.06631200 | -1.50668900 | 0.32352300  |
| H | -1.14999700 | -2.12693300 | 1.21823800  |
| N | -1.99551700 | -0.40511200 | 0.28829200  |
| C | -2.80727700 | -0.18292400 | 1.22252800  |
| C | 0.35835300  | -0.97694000 | 0.13424200  |
| H | 0.33892800  | -0.27927300 | -0.70539700 |
| C | 1.38917800  | -2.04698900 | -0.10708900 |
| C | 2.31629700  | -1.87807600 | -1.14132600 |
| C | 1.47723200  | -3.18592500 | 0.70577200  |
| C | 3.31418800  | -2.82922400 | -1.36454400 |
| H | 2.25733200  | -0.99313600 | -1.76807000 |
| C | 2.46673800  | -4.13994500 | 0.47835800  |
| H | 0.77783700  | -3.32503100 | 1.52441400  |
| C | 3.39054500  | -3.96361900 | -0.55660800 |
| H | 4.02921100  | -2.68152000 | -2.16832200 |
| H | 2.52089800  | -5.02035700 | 1.11175100  |
| H | 4.16439500  | -4.70573400 | -0.72817300 |
| S | 0.78068300  | 0.04349700  | 1.64377300  |

C 2.27027300 0.80348500 1.00932300  
 C 3.52445700 0.30361300 1.37488600  
 C 2.18129600 1.88412400 0.12283800  
 C 4.68819300 0.87755100 0.86340400  
 H 3.59473600 -0.54102700 2.05107000  
 C 3.33641000 2.45825000 -0.40398900  
 H 1.20978000 2.27205000 -0.16273900  
 C 4.57585800 1.94538600 -0.02333600  
 H 5.66189000 0.49226900 1.14330600  
 H 3.27282000 3.29218600 -1.09366200  
 Cl 6.04217700 2.66801100 -0.68550400  
 C -3.07823700 -0.82935800 2.53785900  
 H -2.57309900 -1.79048500 2.61112200  
 H -2.73068500 -0.17254600 3.34197100  
 H -4.15461300 -0.97514700 2.65841200  
 O -3.65093800 0.93849100 1.08437600  
 S -3.76666700 1.75282700 -0.34669300  
 O -4.05119400 0.86166600 -1.45853900  
 O -4.64243100 2.86557100 -0.01645300  
 C -2.04039500 2.50344500 -0.58005500  
 F -2.23475600 3.72759700 -1.06692000  
 F -1.42275700 2.57970300 0.59310300  
 F -1.32525900 1.79723300 -1.44120100

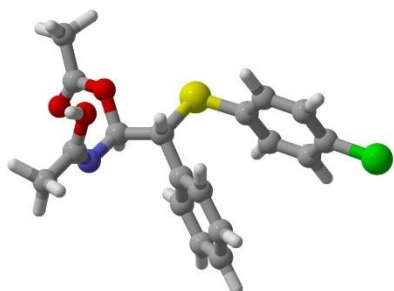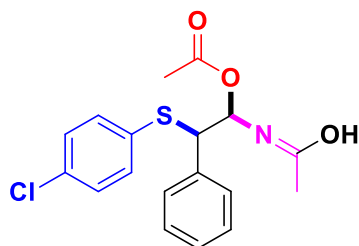

C 3.92667100 1.48925900 -0.56968800  
 O 4.60344100 1.08289900 0.35297400  
 C 4.27219800 2.64379800 -1.46880300  
 H 4.33991100 2.29907100 -2.50517400  
 H 3.48099400 3.39827400 -1.42327100  
 H 5.22205900 3.08054600 -1.16114800  
 O 2.73545600 0.95282100 -0.92199300  
 C 2.27401400 -0.17210600 -0.13365300  
 H 2.55606500 0.00569200 0.90526300  
 C 0.74963900 -0.15423000 -0.31449100  
 H 0.53760200 -0.37856800 -1.36233100  
 S 0.02529500 -1.56477100 0.68534200  
 C -1.70171200 -1.25688400 0.33025900  
 C -2.50377000 -0.60656900 1.27472400  
 C -2.25007000 -1.63597500 -0.90075300  
 C -3.84203600 -0.33128500 0.99646400  
 H -2.08028900 -0.29834600 2.22395300  
 C -3.58397600 -1.35892200 -1.19566800  
 H -1.63333600 -2.14150500 -1.63633800  
 C -4.36185200 -0.70874000 -0.23929900  
 H -4.46375600 0.17612000 1.72516700  
 H -4.00940200 -1.64593800 -2.15050100

C 0.11026200 1.15644400 0.06466900  
C -0.77780600 1.76904100 -0.82587700  
C 0.33802700 1.75237200 1.31286300  
C -1.42873500 2.95501900 -0.48056100  
H -0.96743200 1.30532000 -1.78937100  
C -0.30448300 2.94036500 1.65629600  
H 1.00885500 1.27955700 2.02364700  
C -1.19305200 3.54452300 0.76158000  
H -2.12041100 3.41387900 -1.18079300  
H -0.11722900 3.39286600 2.62563700  
H -1.69890900 4.46590000 1.03419900  
Cl -6.05072400 -0.35348200 -0.60503300  
N 2.86281000 -1.36254500 -0.69480700  
C 3.31123000 -2.26042400 0.09289500  
O 3.21318500 -2.14951900 1.44233900  
H 3.62884700 -2.91719500 1.86849600  
C 3.95780600 -3.50937900 -0.42264200  
H 3.99870500 -3.48988000 -1.51121700  
H 4.97400600 -3.60117900 -0.02245500  
H 3.39083800 -4.38872100 -0.09647200

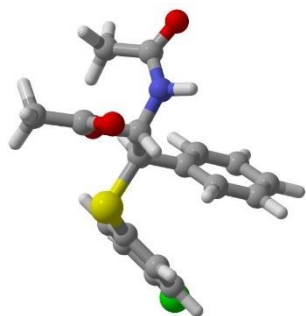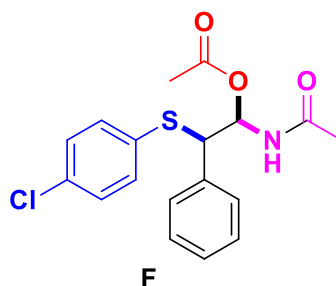

C 4.01136300 1.24744900 -0.71210500  
O 4.74045500 0.63568800 0.04183400  
C 4.39577000 2.42290600 -1.56049800  
H 4.20951400 2.19319700 -2.61392400  
H 3.77906100 3.28701000 -1.29571700  
H 5.44939500 2.65546500 -1.41005100  
O 2.70076500 0.93182700 -0.88700800  
C 2.20546600 -0.13721000 -0.05498800  
H 2.48350200 0.05496700 0.98416800  
C 0.68654800 -0.12679100 -0.25786000  
H 0.50060400 -0.32666500 -1.31523900  
S -0.01526100 -1.57718800 0.69023300  
C -1.74027800 -1.29286000 0.30107100  
C -2.57162900 -0.67415500 1.24108300  
C -2.25380500 -1.65624000 -0.94923500  
C -3.90738500 -0.41375200 0.93801700  
H -2.17351100 -0.37920200 2.20526800  
C -3.58544100 -1.39481300 -1.26742000  
H -1.61317800 -2.13738600 -1.68067300  
C -4.39398100 -0.77546300 -0.31592200  
H -4.55279100 0.06972900 1.66230600  
H -3.98542600 -1.66991000 -2.23663900  
C 0.03747400 1.17026300 0.14432600  
C -0.79765600 1.82713600 -0.76601200  
C 0.20224800 1.70638600 1.42895100



C -1.46049200 3.00027100 -0.40177900  
H -0.93712200 1.40749700 -1.75782500  
C -0.45222500 2.88232600 1.79038300  
H 0.82934300 1.19605000 2.15350600  
C -1.28826000 3.53128600 0.87700600  
H -2.11282400 3.49459200 -1.11531100  
H -0.31626400 3.28921000 2.78789800  
H -1.80412900 4.44278000 1.16345900  
Cl -6.07969700 -0.43969800 -0.71131900  
N 2.78243000 -1.36610800 -0.55786000  
C 3.55225800 -2.09157700 0.34603700  
O 3.15412700 -2.23403500 1.50159500  
C 4.76490400 -2.75853600 -0.22827000  
H 4.45142100 -3.53684400 -0.93257800  
H 5.36321500 -2.03027500 -0.78340200  
H 5.35914000 -3.20517600 0.57038400

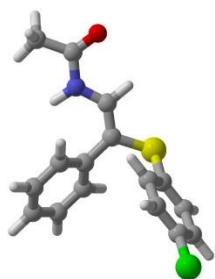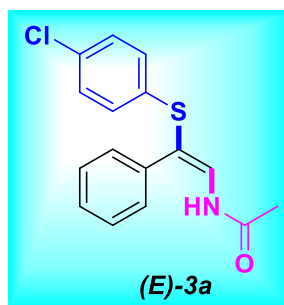

C 4.50341300 1.33407100 -0.66962100  
O 4.49091100 2.55240900 -0.53416200  
C 5.67414500 0.56619400 -1.23422600  
H 5.35422700 -0.31997000 -1.78918000  
H 6.25451800 1.22252500 -1.88403600  
H 6.31787800 0.23619200 -0.41061700  
N 3.43753100 0.54369300 -0.28177800  
H 3.50846000 -0.45704400 -0.42042100  
C 2.31006200 1.06009700 0.32973700  
H 2.37171800 2.12619600 0.51215500  
C 1.23473500 0.33931600 0.72196000  
C 1.02486900 -1.10008000 0.44000900  
C 1.23897400 -1.60523800 -0.85481300  
C 0.57639400 -1.98227200 1.43706500  
C 1.03622300 -2.95633900 -1.13586200  
H 1.54436500 -0.93162300 -1.64925900  
C 0.37242900 -3.33085800 1.15372600  
H 0.38903900 -1.60425800 2.43662800  
C 0.60398100 -3.82508700 -0.13276600  
H 1.20240000 -3.32503900 -2.14361600  
H 0.03108800 -3.99817000 1.93950400  
H 0.44015600 -4.87567000 -0.35221800  
S 0.03753700 1.19089600 1.73759700  
C -1.47878900 0.94460700 0.81724700  
C -1.49175300 0.84339700 -0.57862700  
C -2.68202700 0.87752300 1.52943000  
C -2.69458000 0.66496400 -1.25888500  
H -0.56546100 0.90295800 -1.13877000  
C -3.89215200 0.71987500 0.85590100  
H -2.68083000 0.94056800 2.61308200

C -3.88244200 0.60906900 -0.53263900  
H -2.70494100 0.58025500 -2.33971500  
H -4.82375700 0.66848000 1.40783700  
Cl -5.40884400 0.38821800 -1.39194200

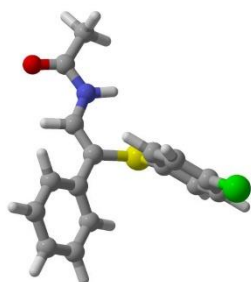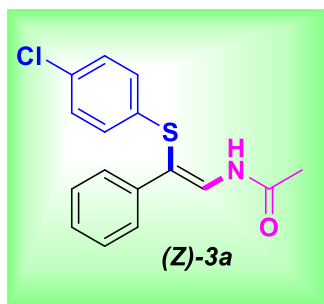

C 4.29333600 1.84958100 0.43350500  
O 4.58388800 3.03209000 0.29001600  
C 5.20498300 0.84679600 1.09764700  
H 5.44110600 0.02007400 0.42042600  
H 6.12487700 1.35693100 1.38219000  
H 4.73580400 0.42321100 1.99174500  
N 3.07418800 1.39018800 -0.03186500  
H 2.50047700 2.09721400 -0.48287900  
C 2.56405700 0.11321900 0.06175700  
H 3.17666200 -0.59114000 0.60996100  
C 1.39618800 -0.30959200 -0.48049800  
C 0.87578000 -1.67307100 -0.24257800  
C 1.11886200 -2.32239300 0.98232800  
C 0.11318000 -2.34751700 -1.21146000  
C 0.64975000 -3.61439100 1.21160500  
H 1.65971500 -1.80242300 1.76662200  
C -0.36340300 -3.63544400 -0.97586800  
H -0.10153600 -1.85883800 -2.15564600  
C -0.09394700 -4.27897200 0.23403100  
H 0.84958700 -4.09458400 2.16504000  
H -0.94616600 -4.13815800 -1.74211100  
H -0.47001300 -5.28070100 0.41799200  
S 0.49493100 0.79276600 -1.56075600  
C -1.10475200 0.88229900 -0.75993000  
C -2.22497900 1.13239700 -1.56060600  
C -1.25558200 0.73220900 0.62269000  
C -3.49017600 1.24009600 -0.98577900  
H -2.11830100 1.23752200 -2.63570300  
C -2.51944600 0.81949500 1.20276700  
H -0.39199800 0.54219500 1.24979200  
C -3.62263100 1.07597000 0.39108900  
H -4.35831300 1.43427900 -1.60522000  
H -2.63901100 0.69600800 2.27320900  
Cl -5.22467700 1.18953100 1.12326000

## 6 NMR Spectra of Compounds

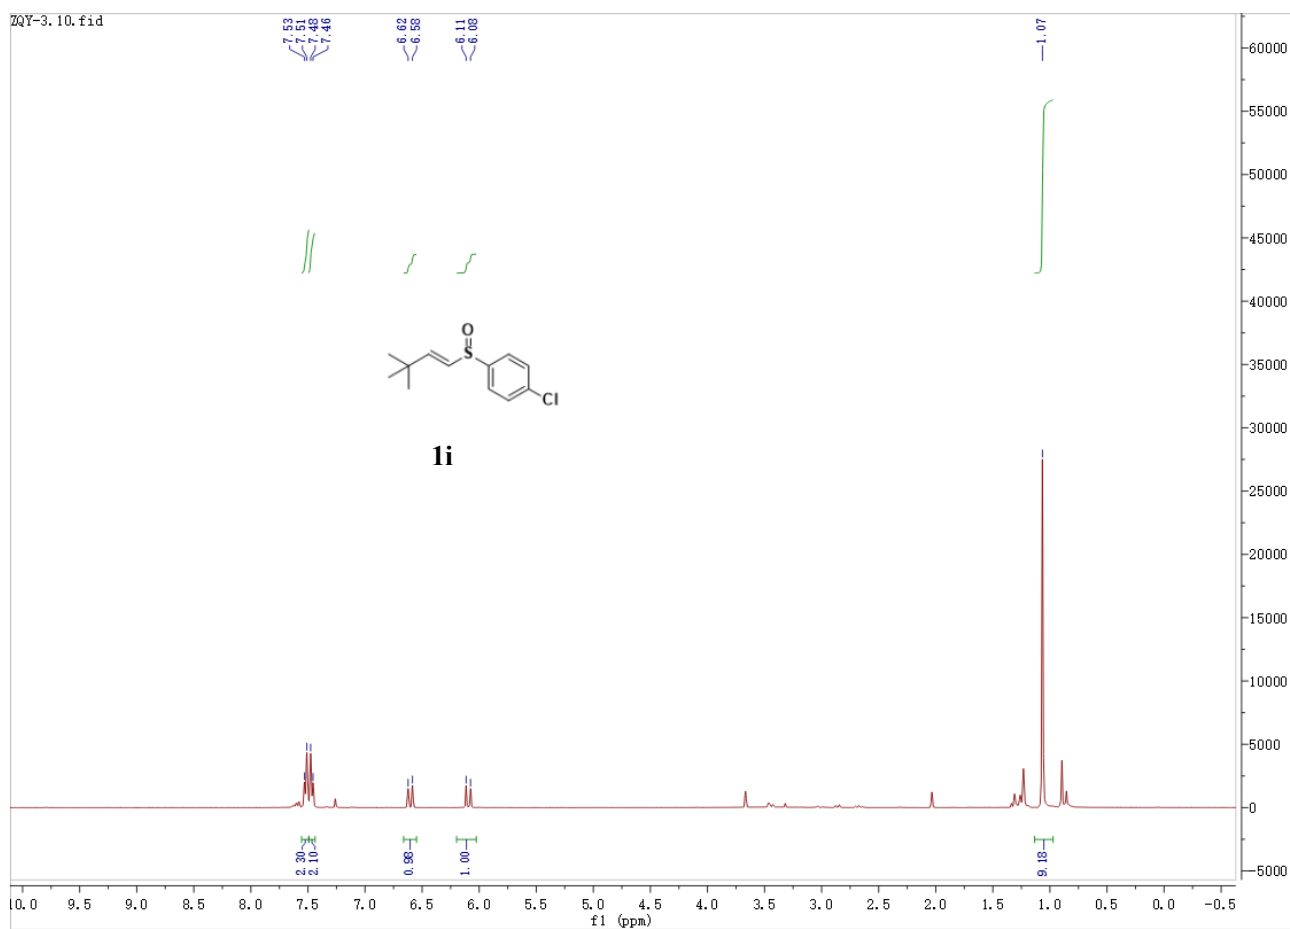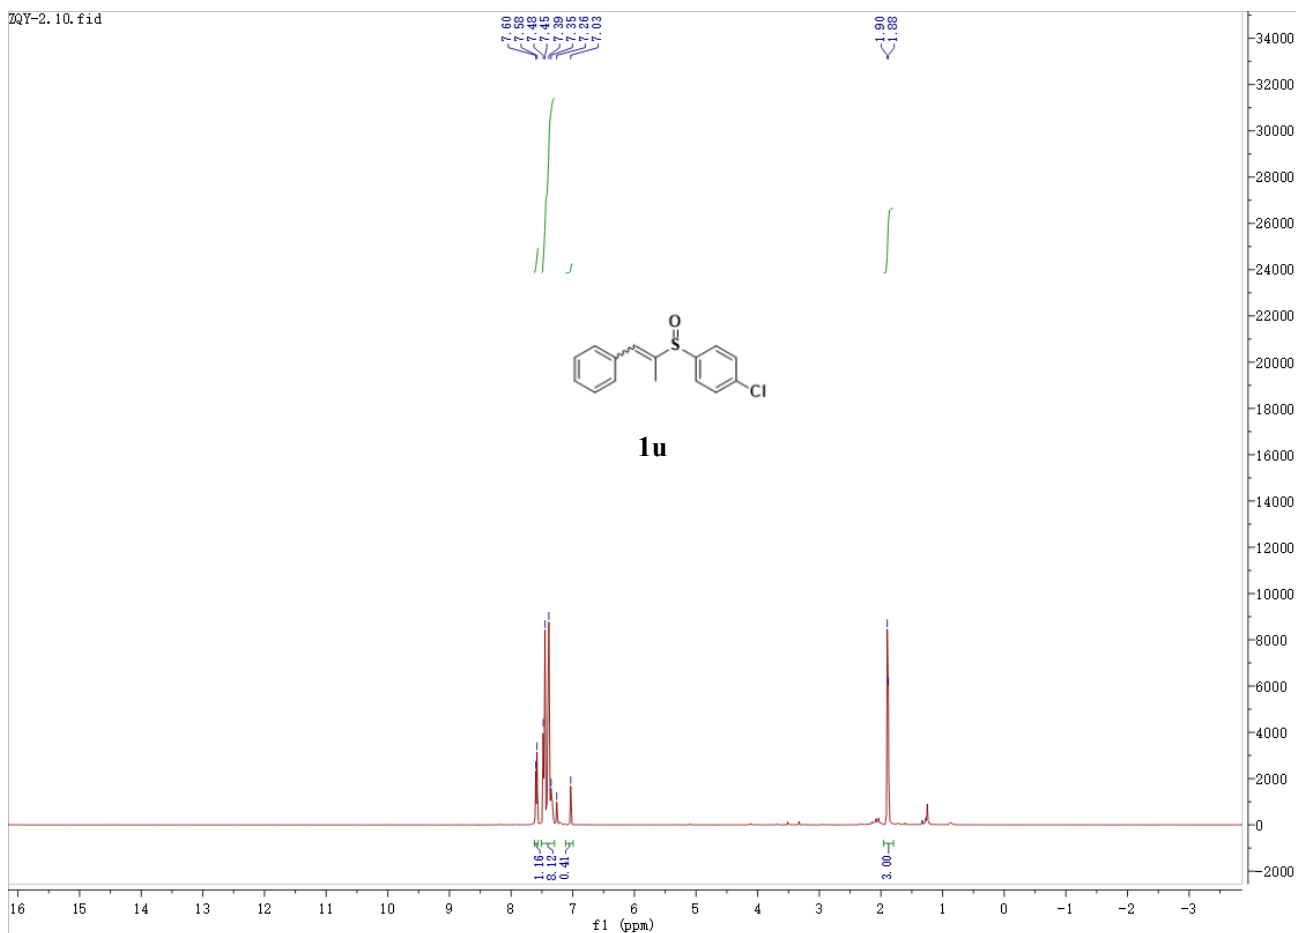

HX24. 2. 25-9. 1. fid

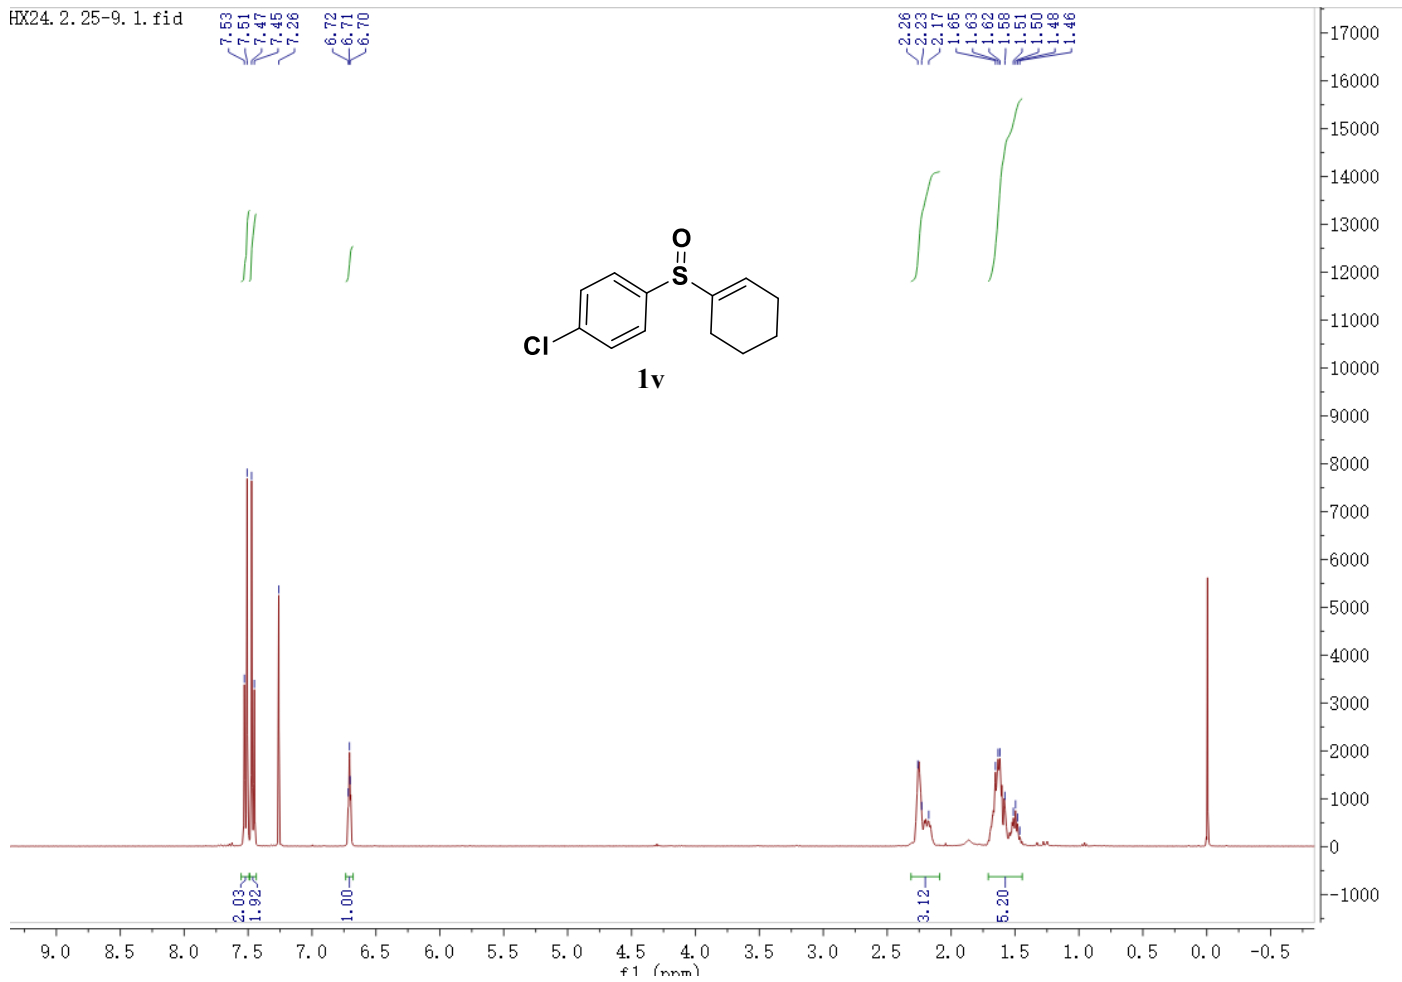

HX24. 2. 25-9. 2. fid

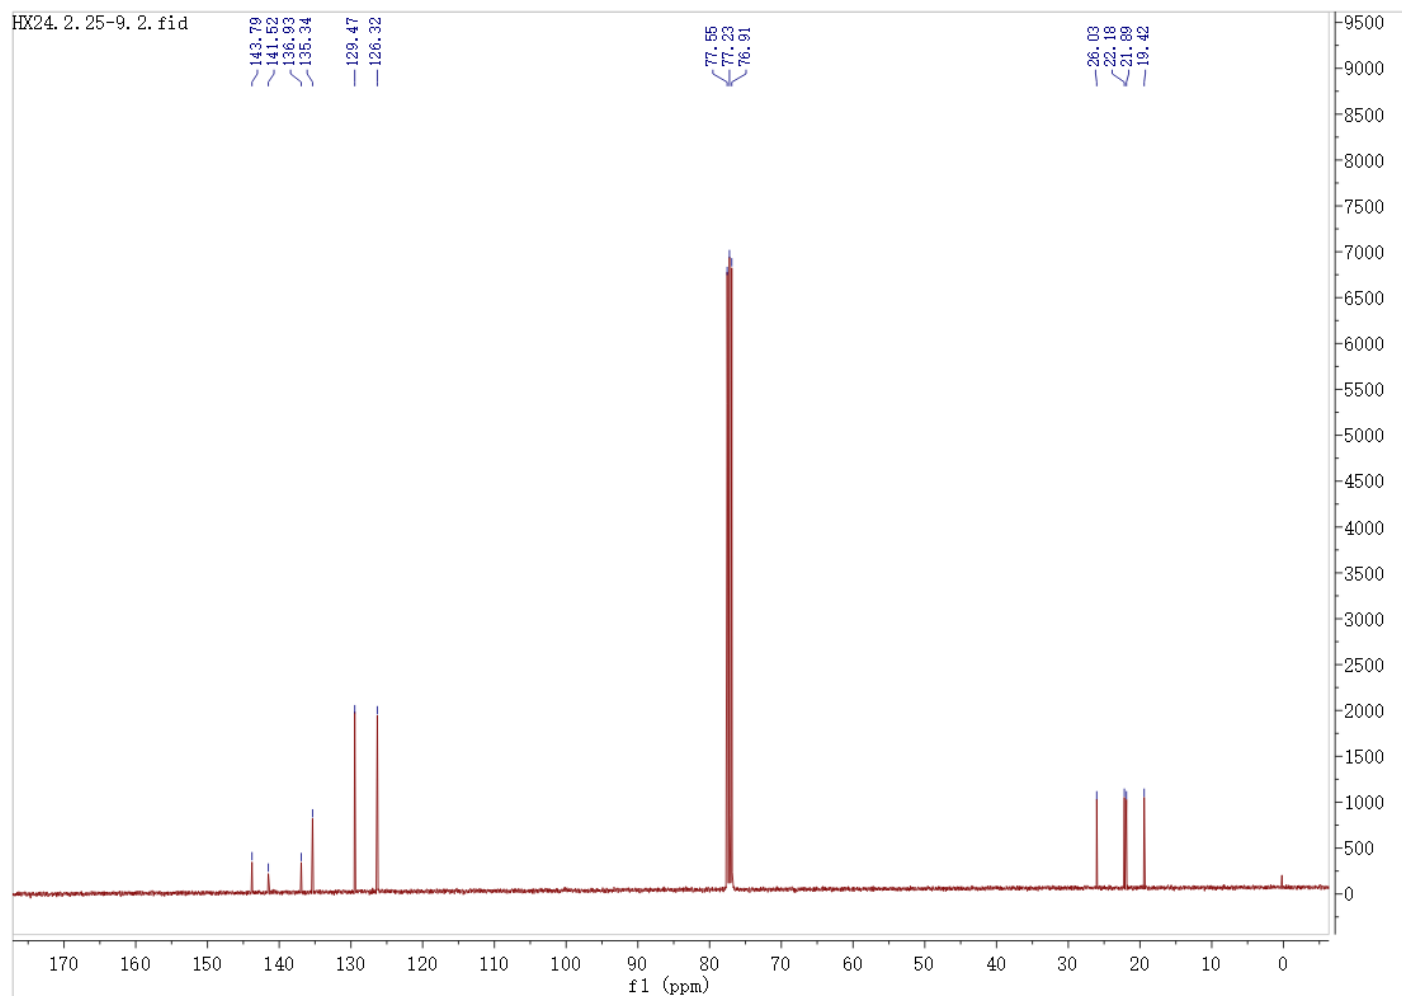

HX24. 2. 28-4. 1. fid

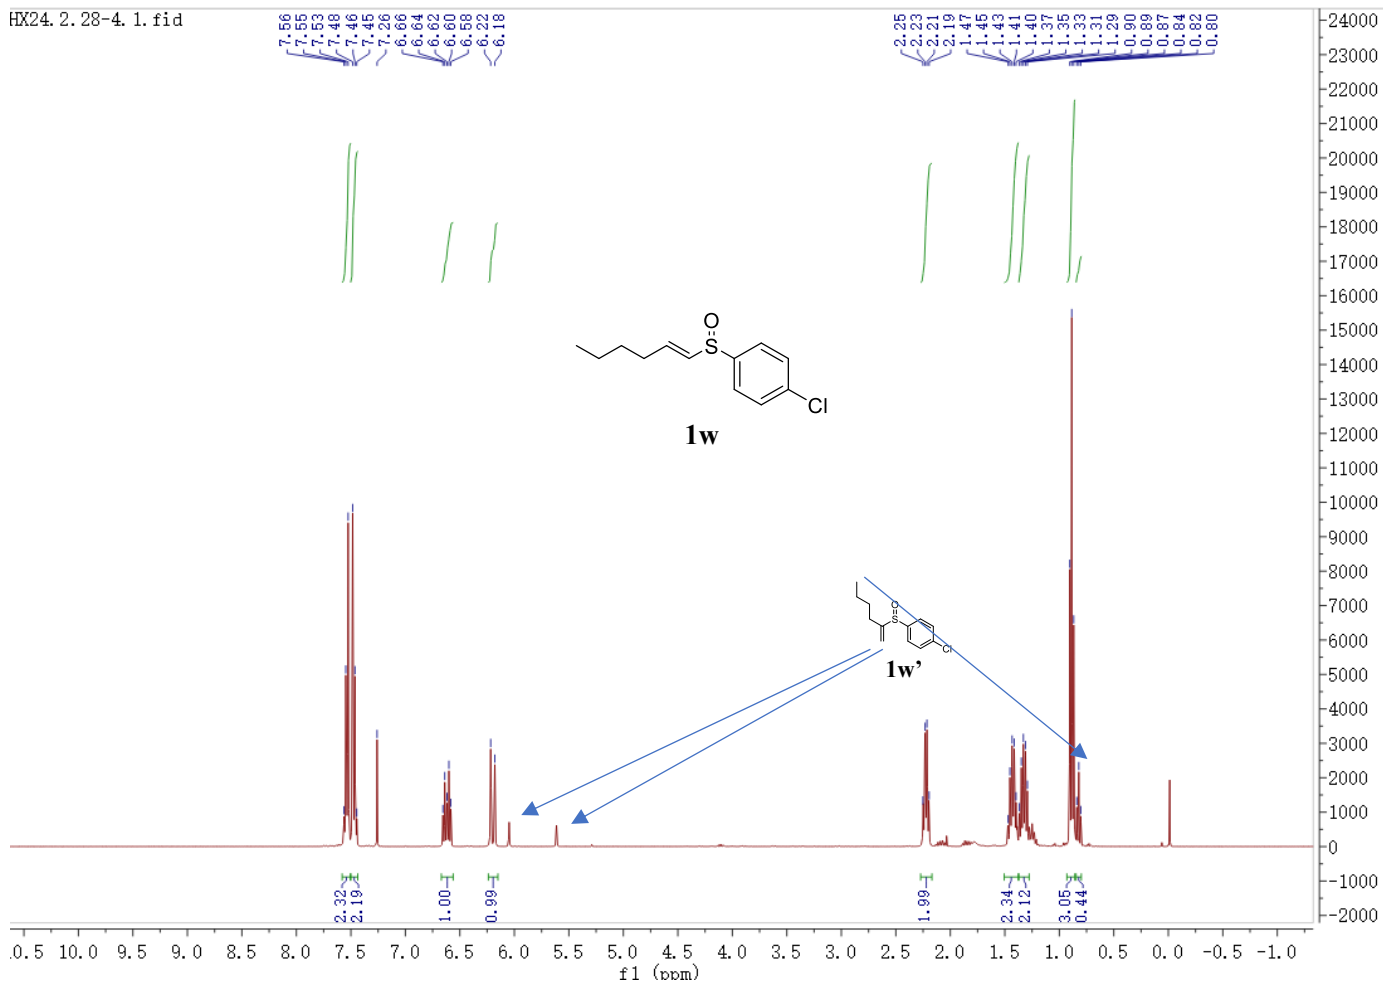

HX24. 2. 28-4. 2. fid

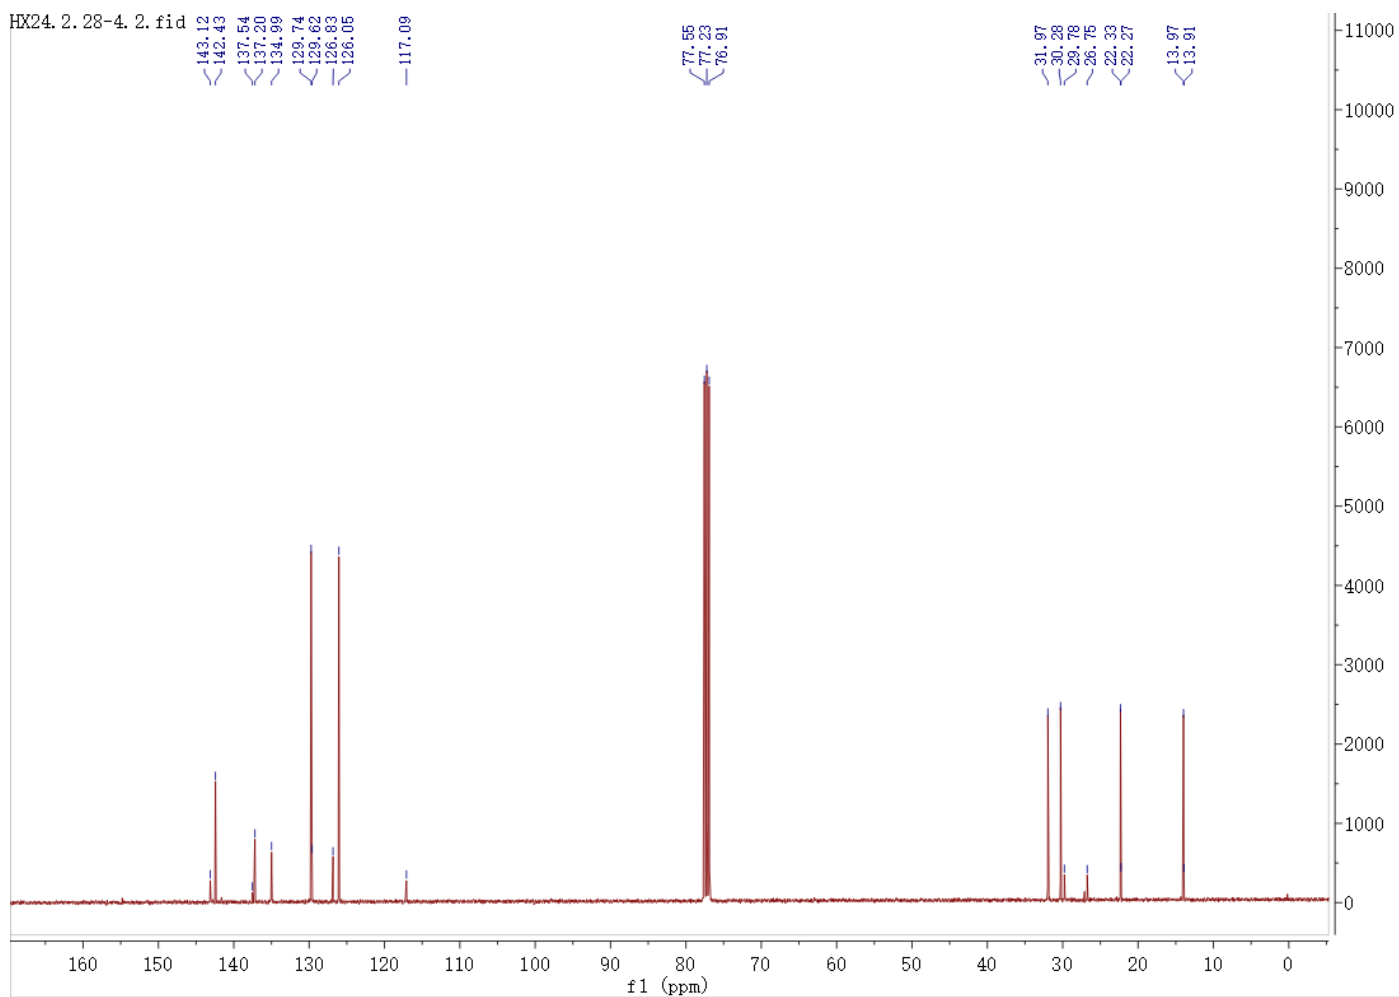

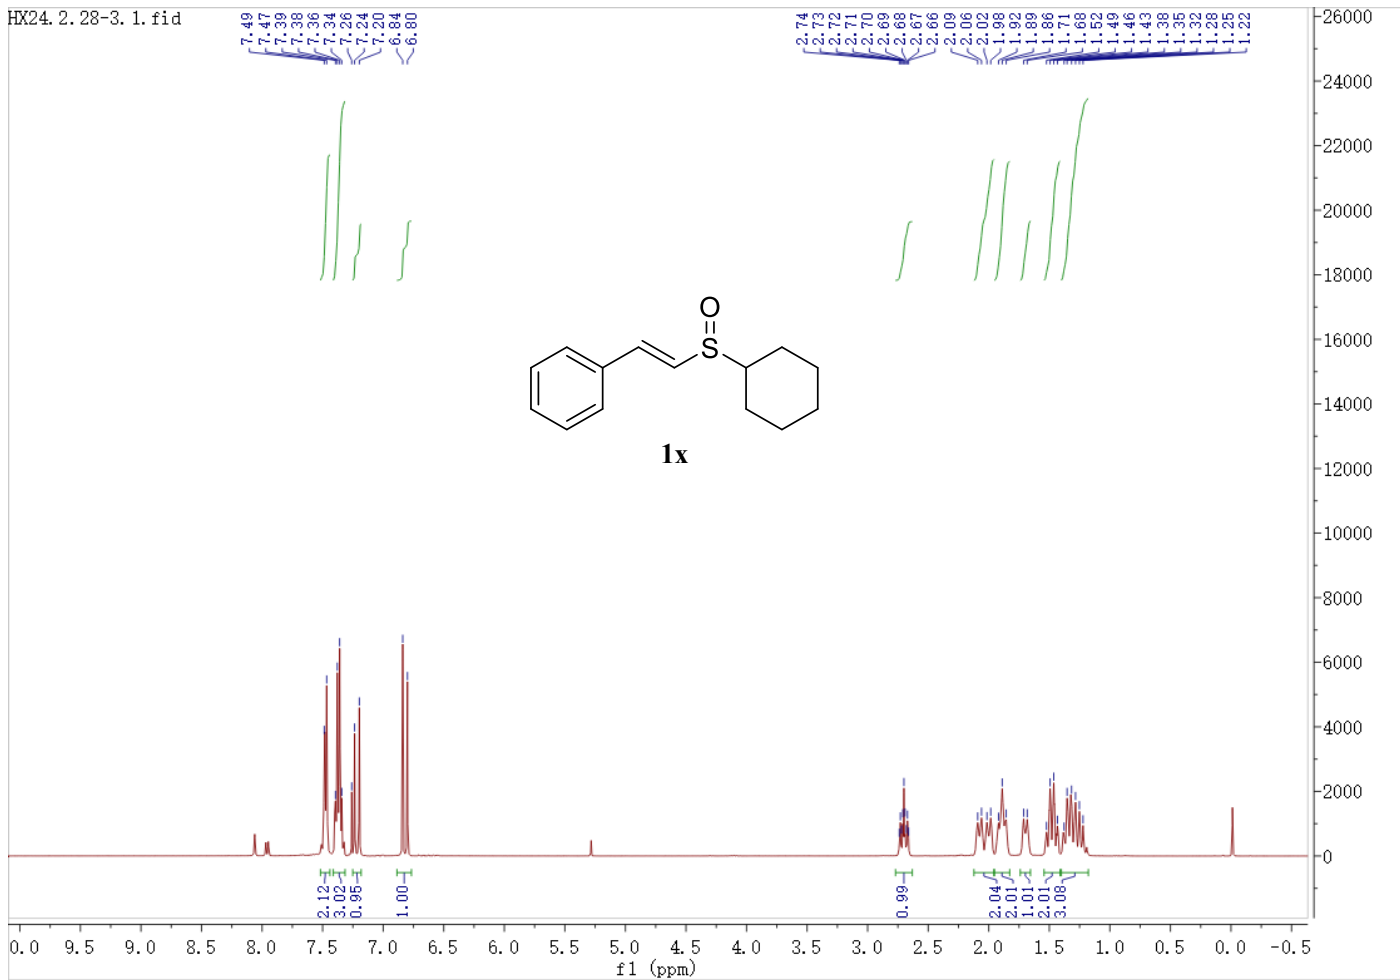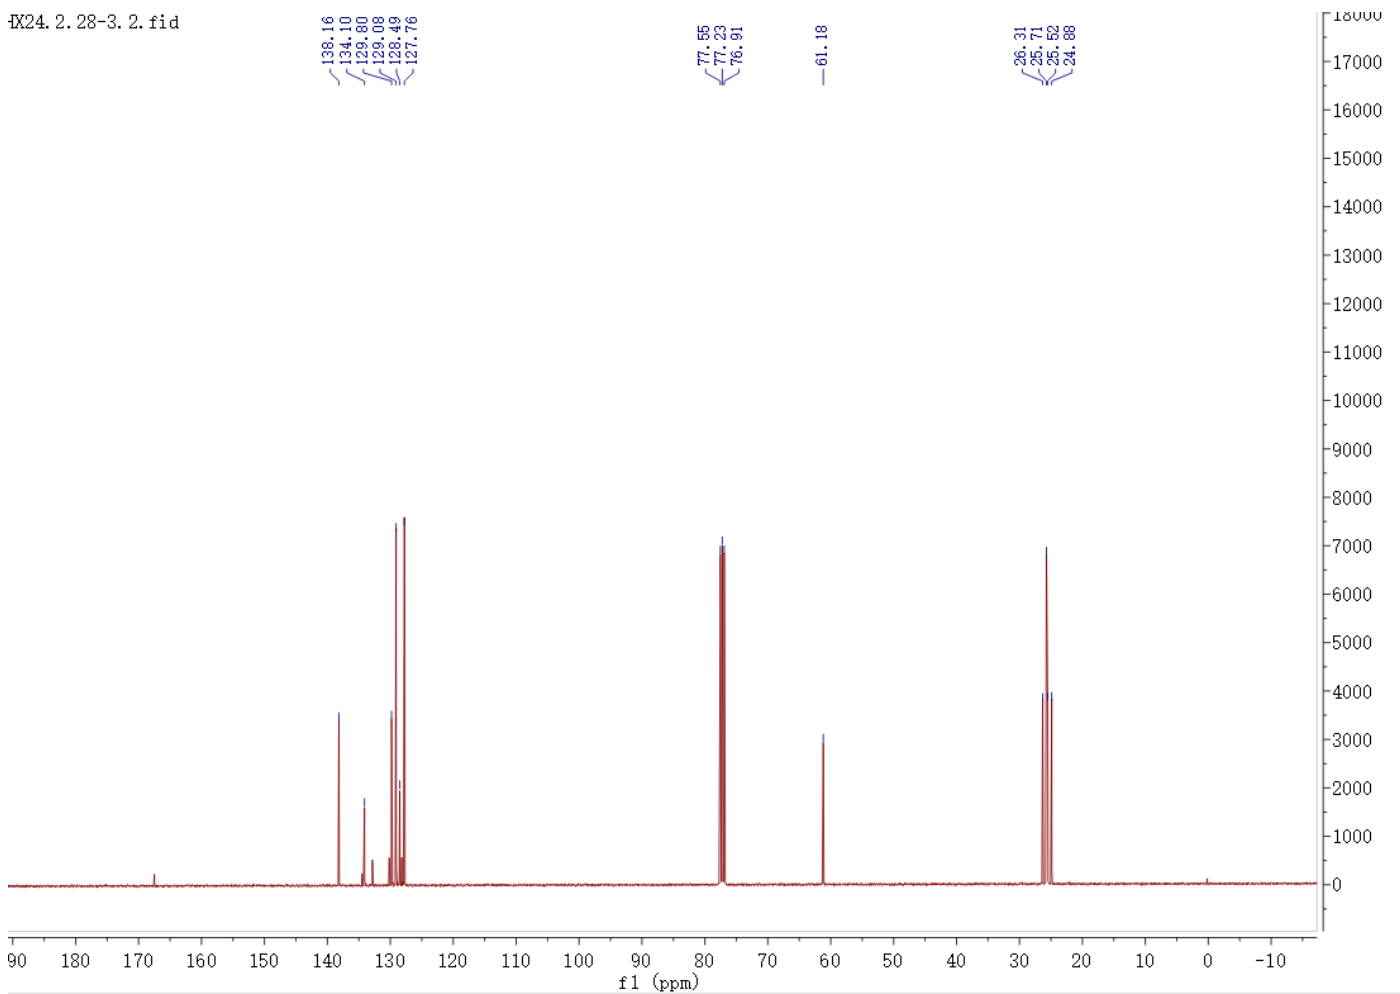

HX24. 2. 25-5. 1. fid

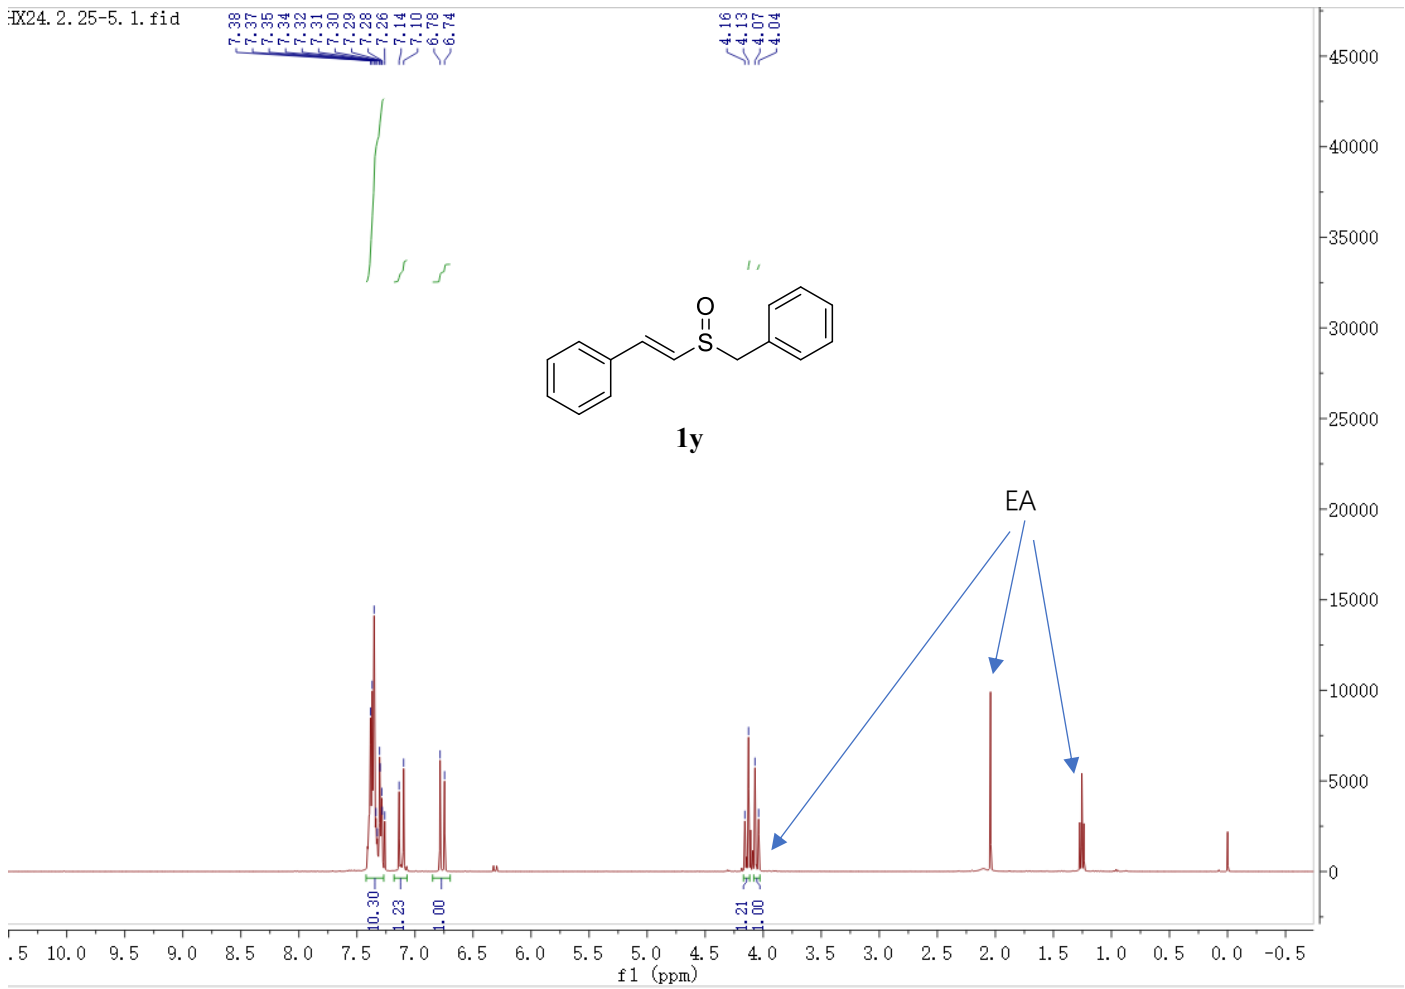

HX2024. 2. 20-1. 1. fid

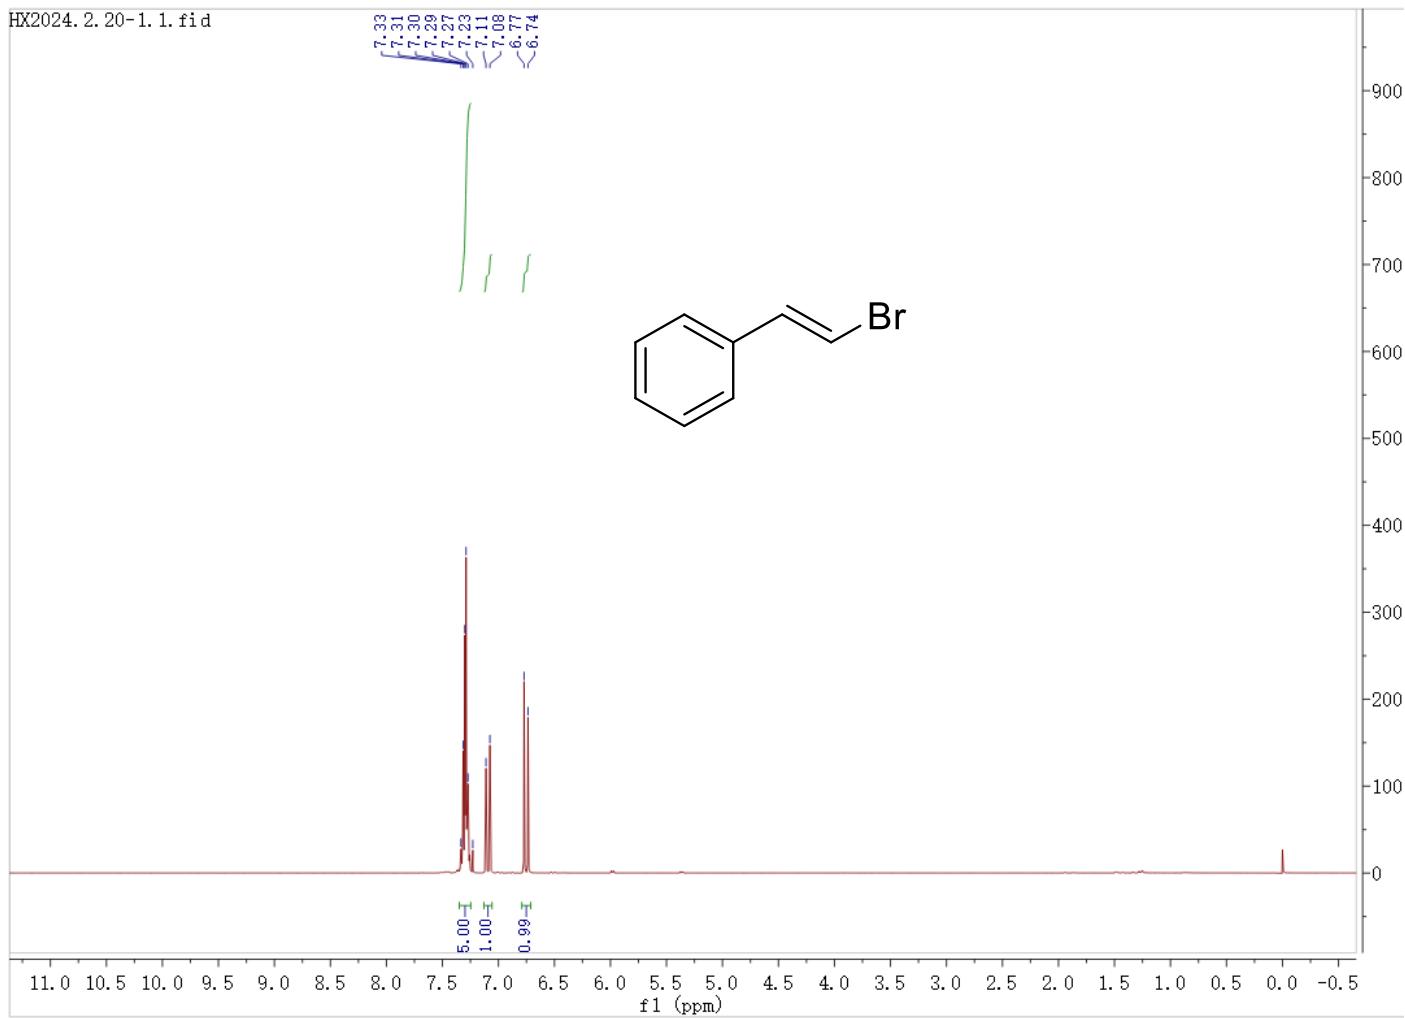



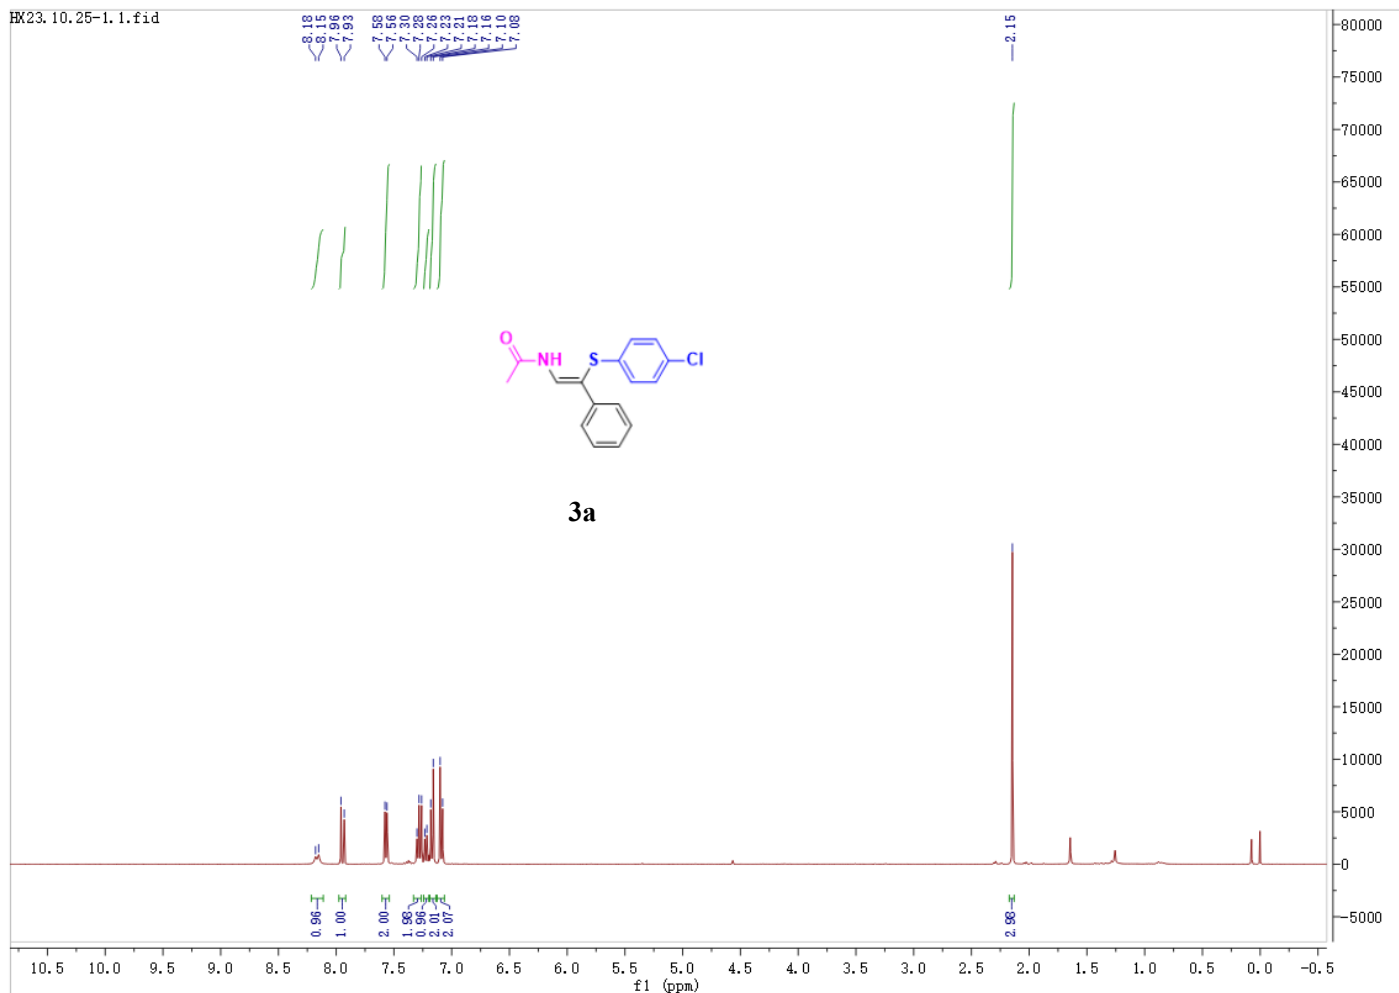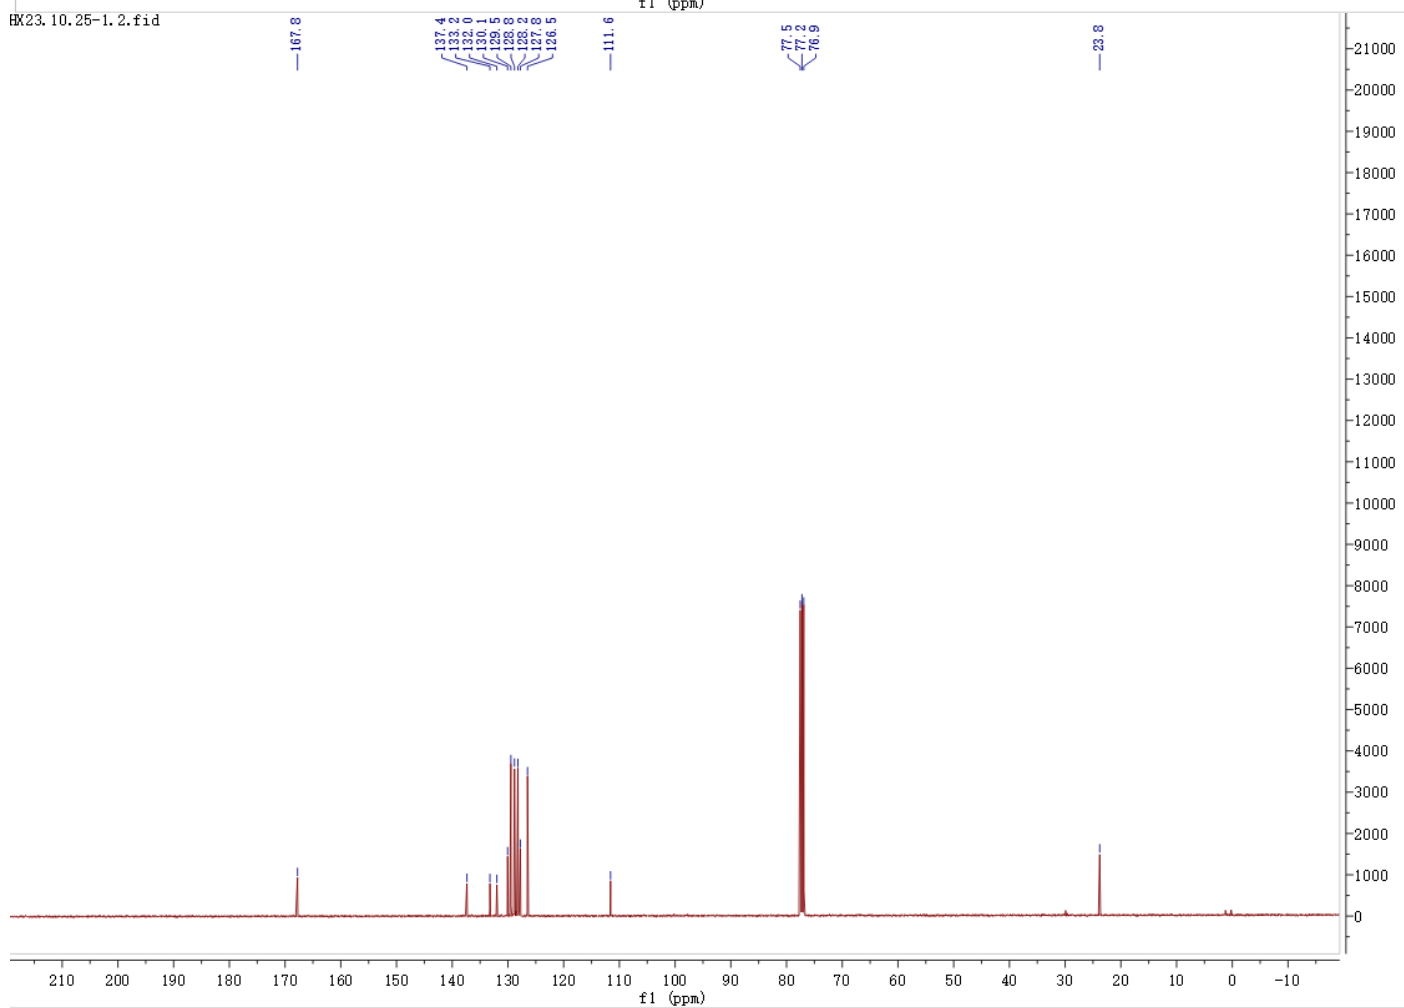

HX2022.4.15-8.10.fid

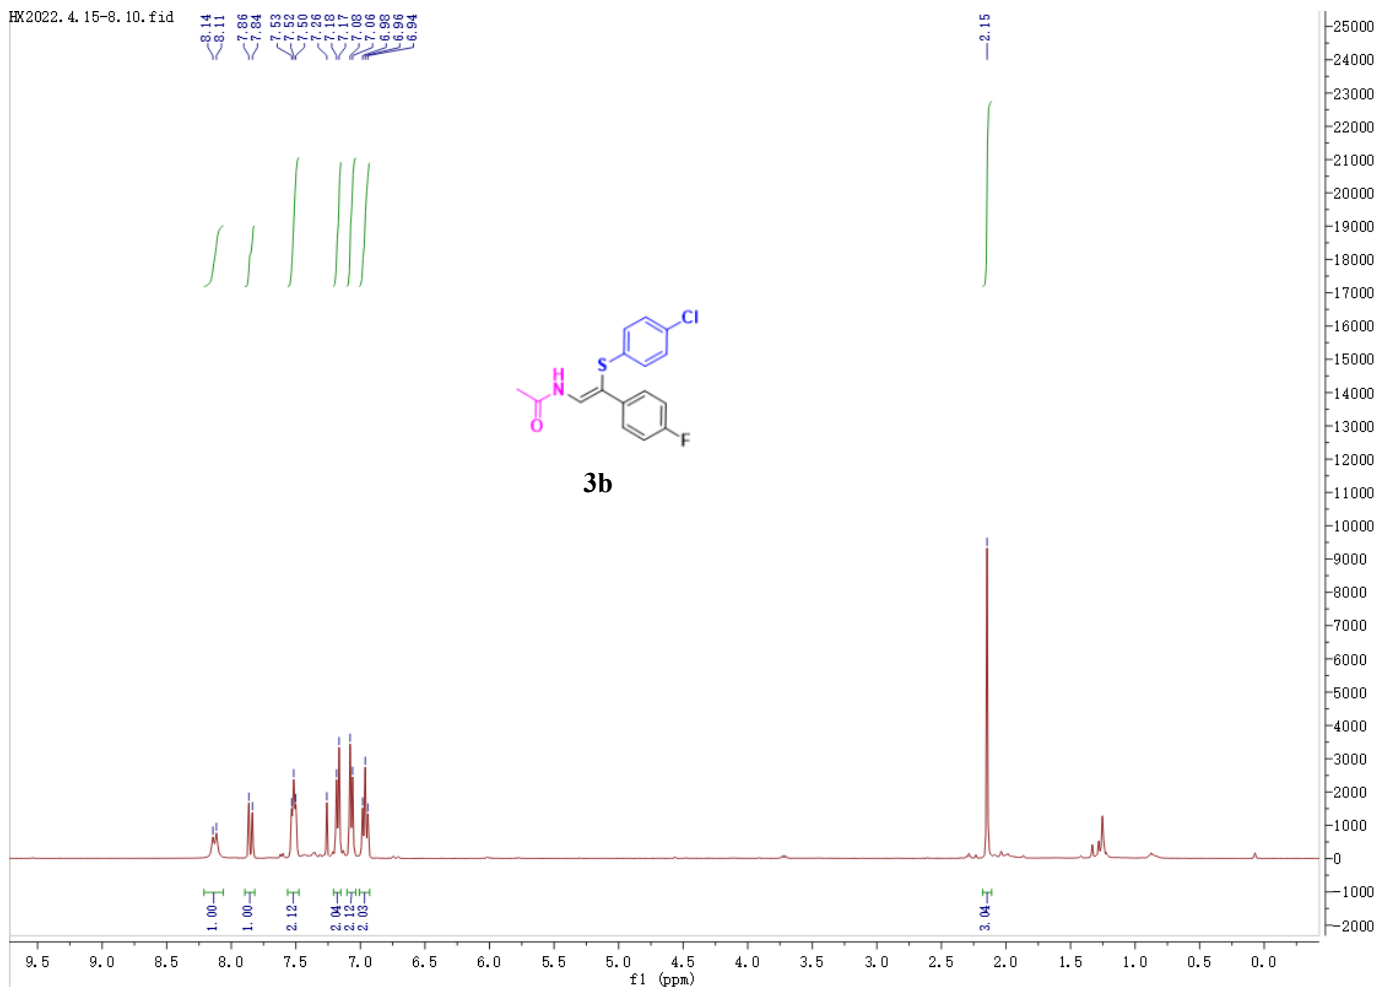

HX2022.4.15-8.12.fid

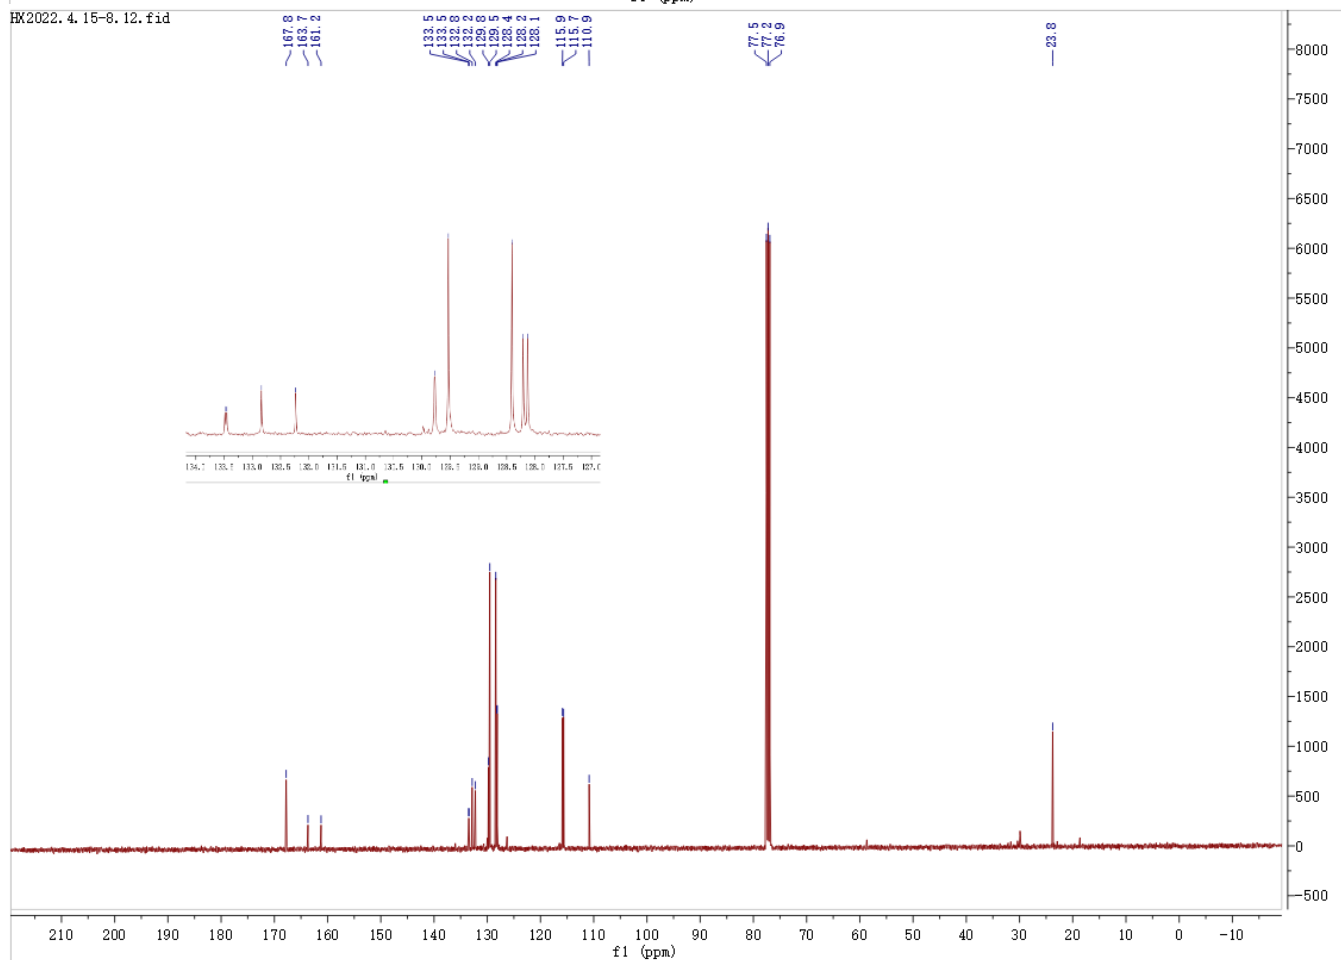

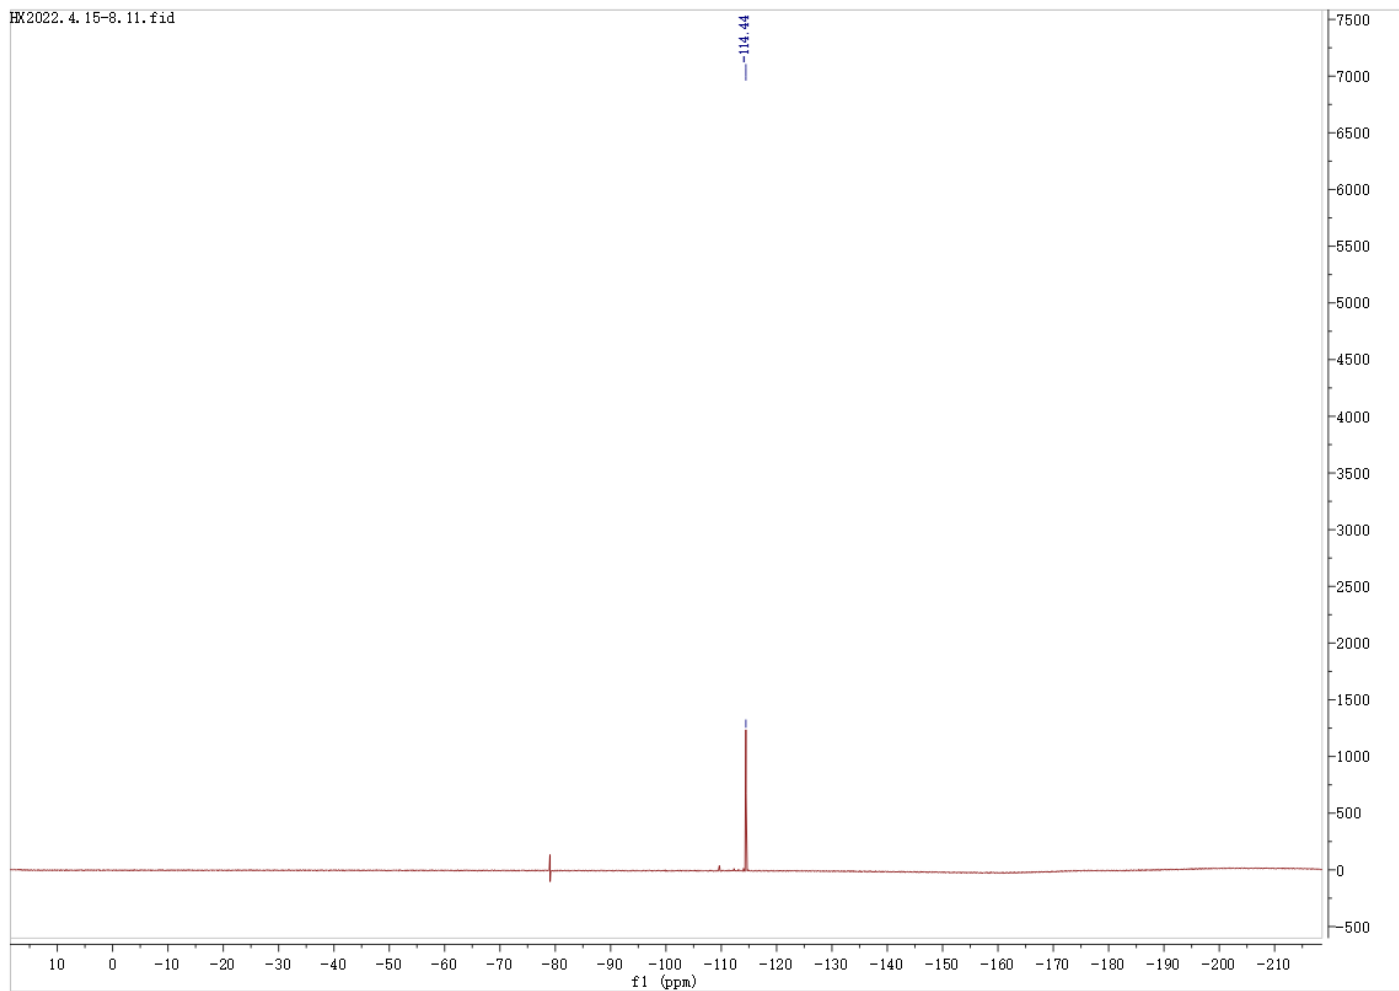

HK2022. 4. 15-5. 10. fid

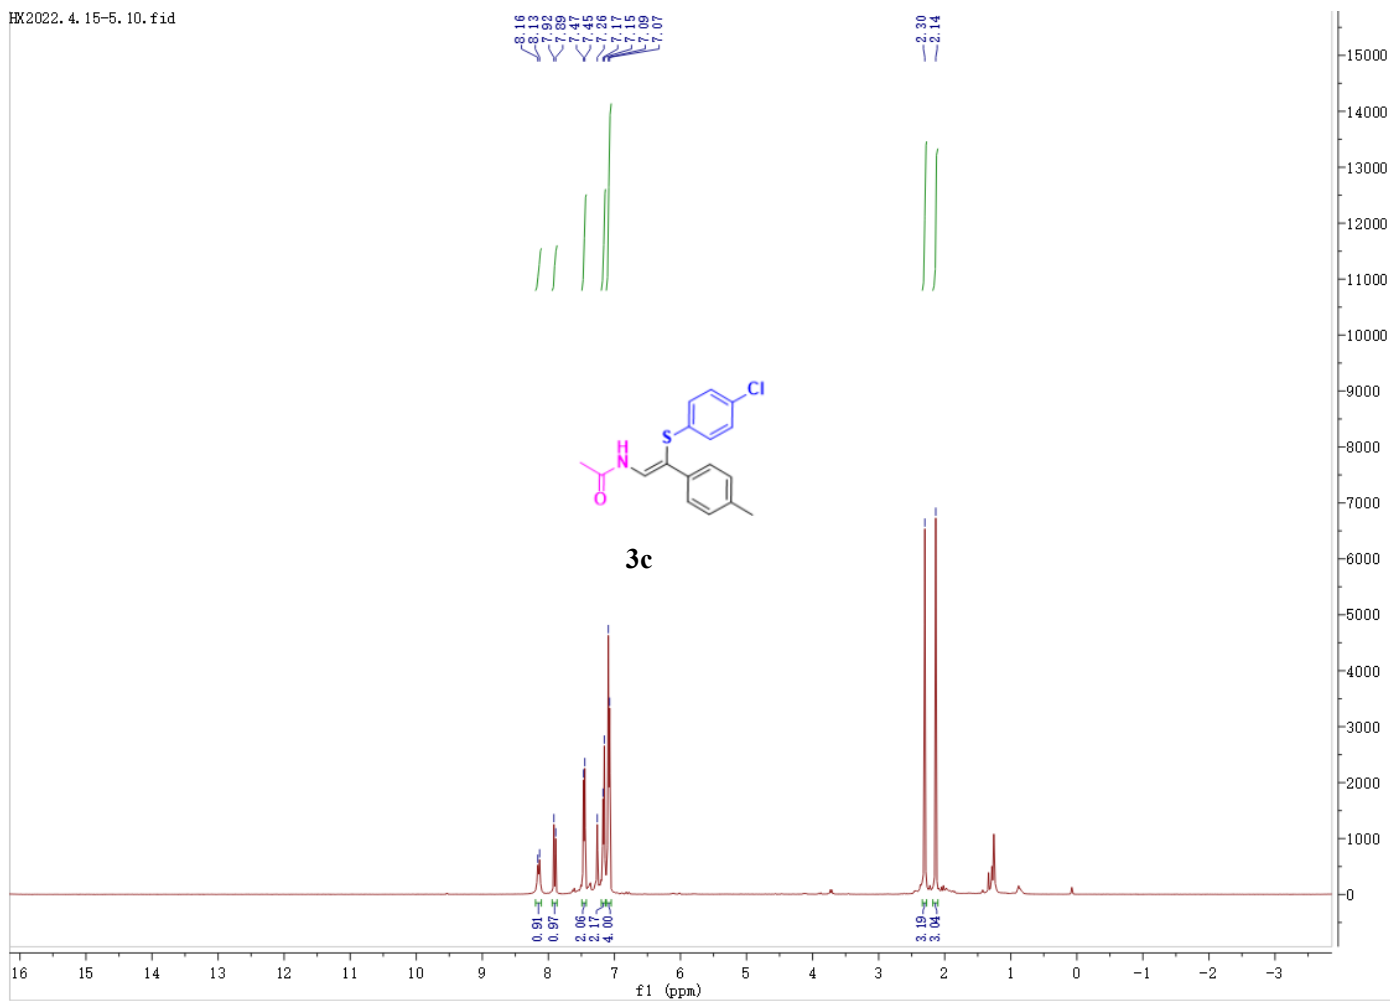

HK2022. 4. 15-5. 11. fid

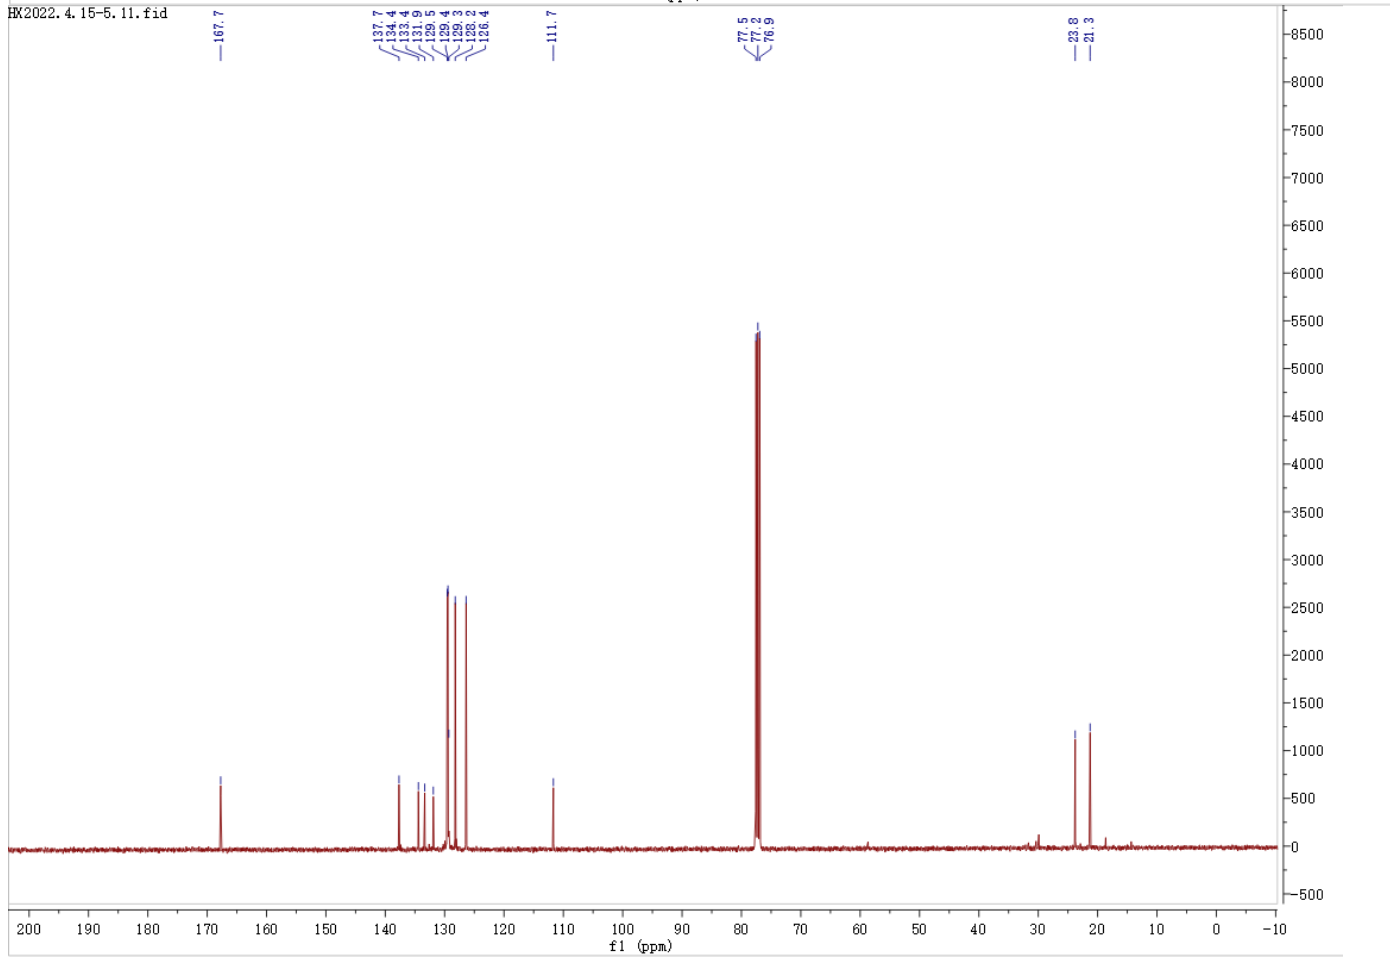

HX220505-2.10.fid

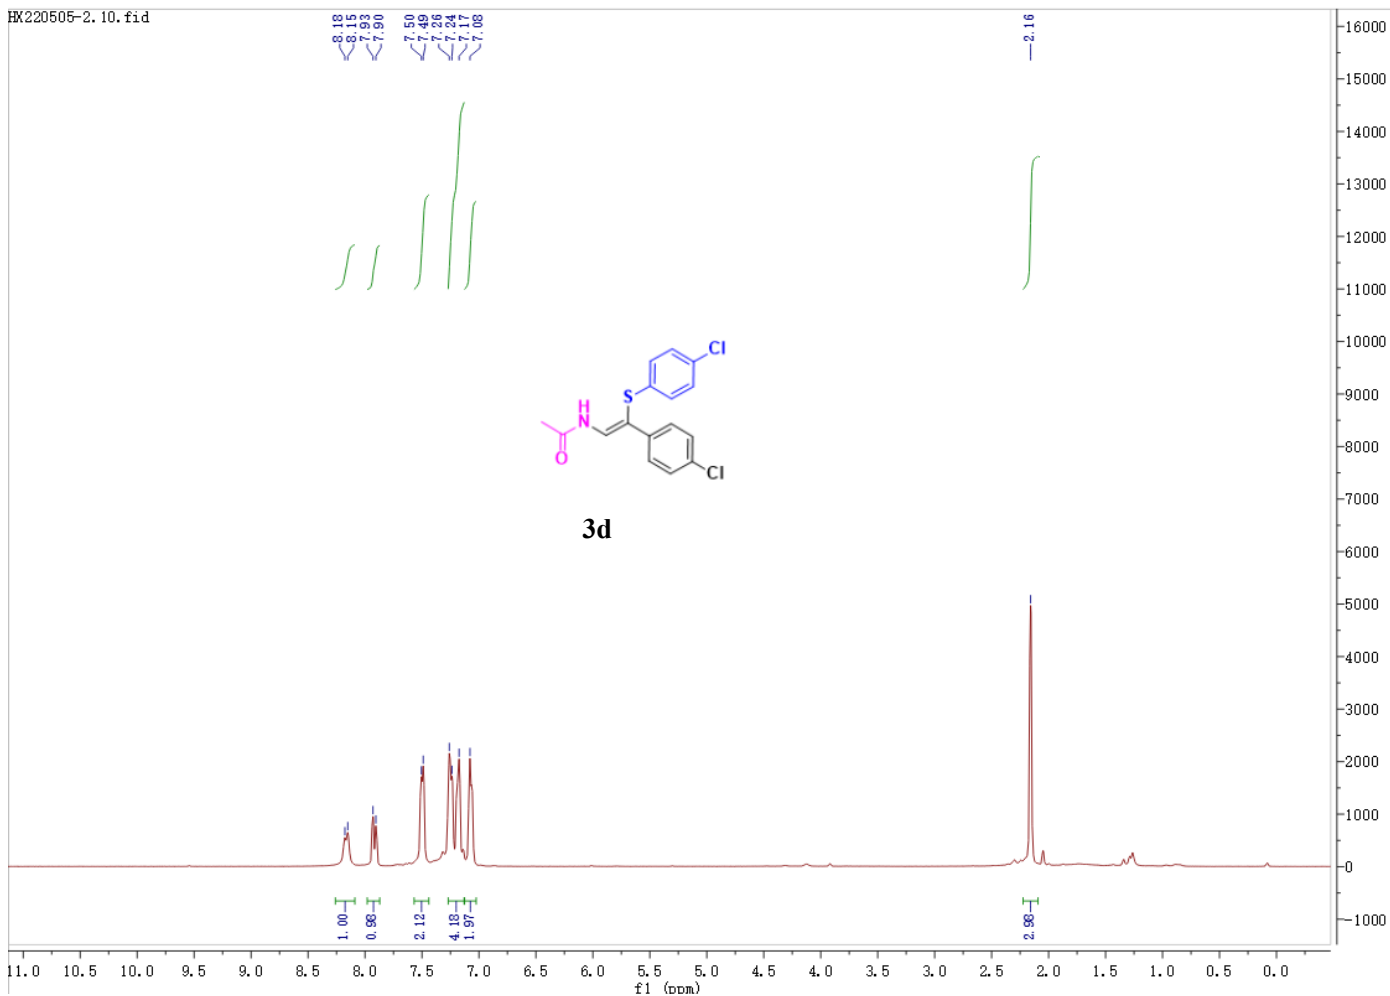

HX220505-2.11.fid

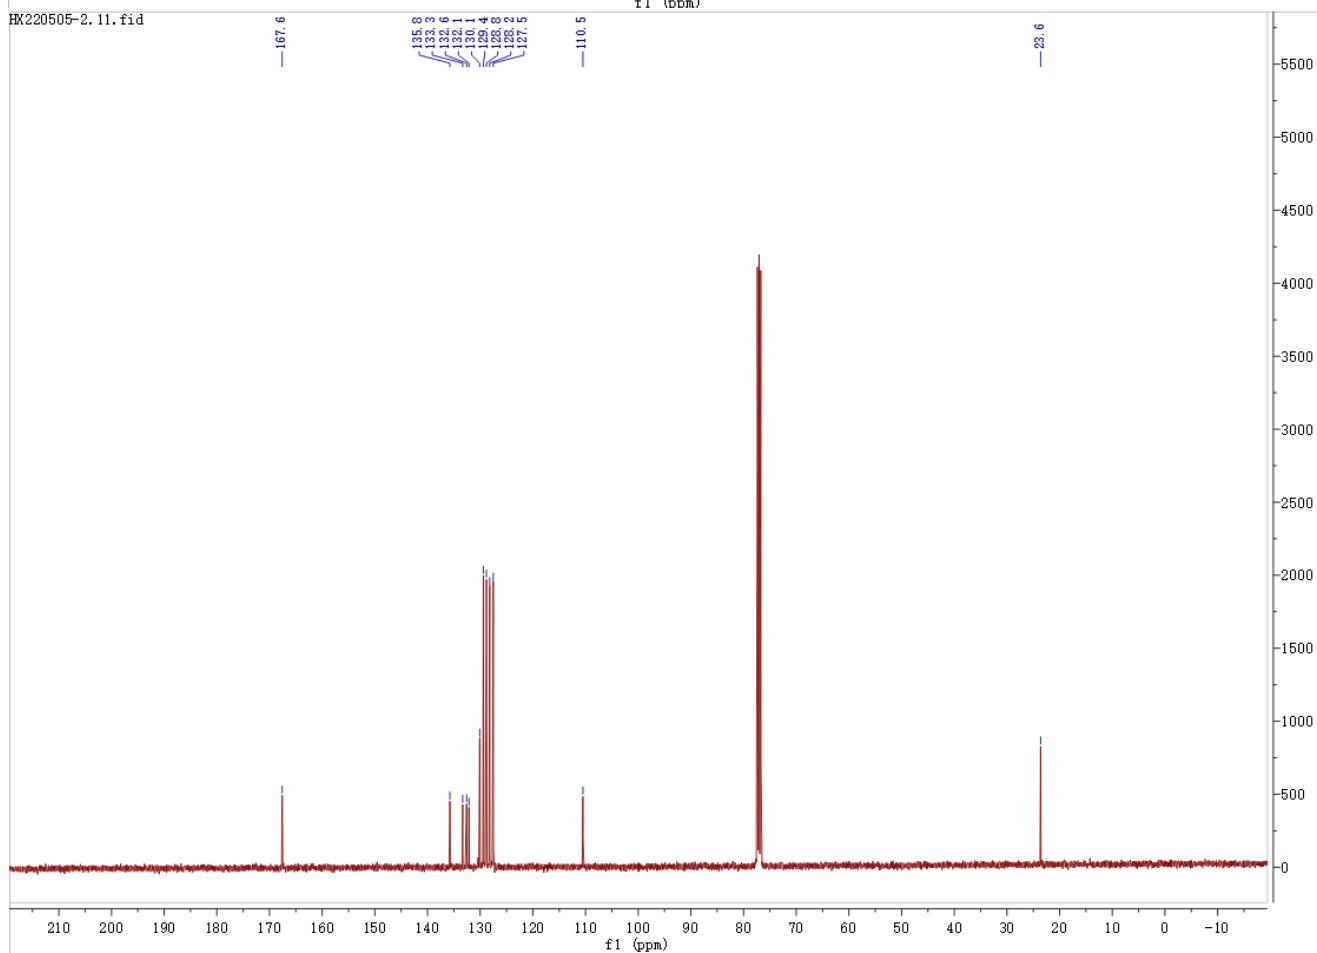

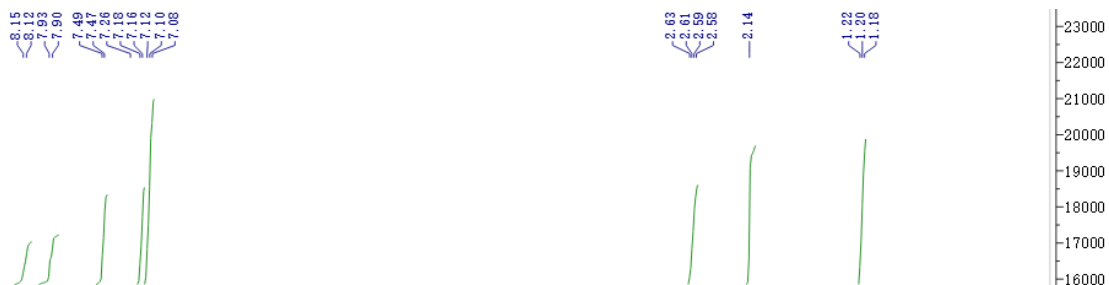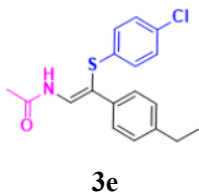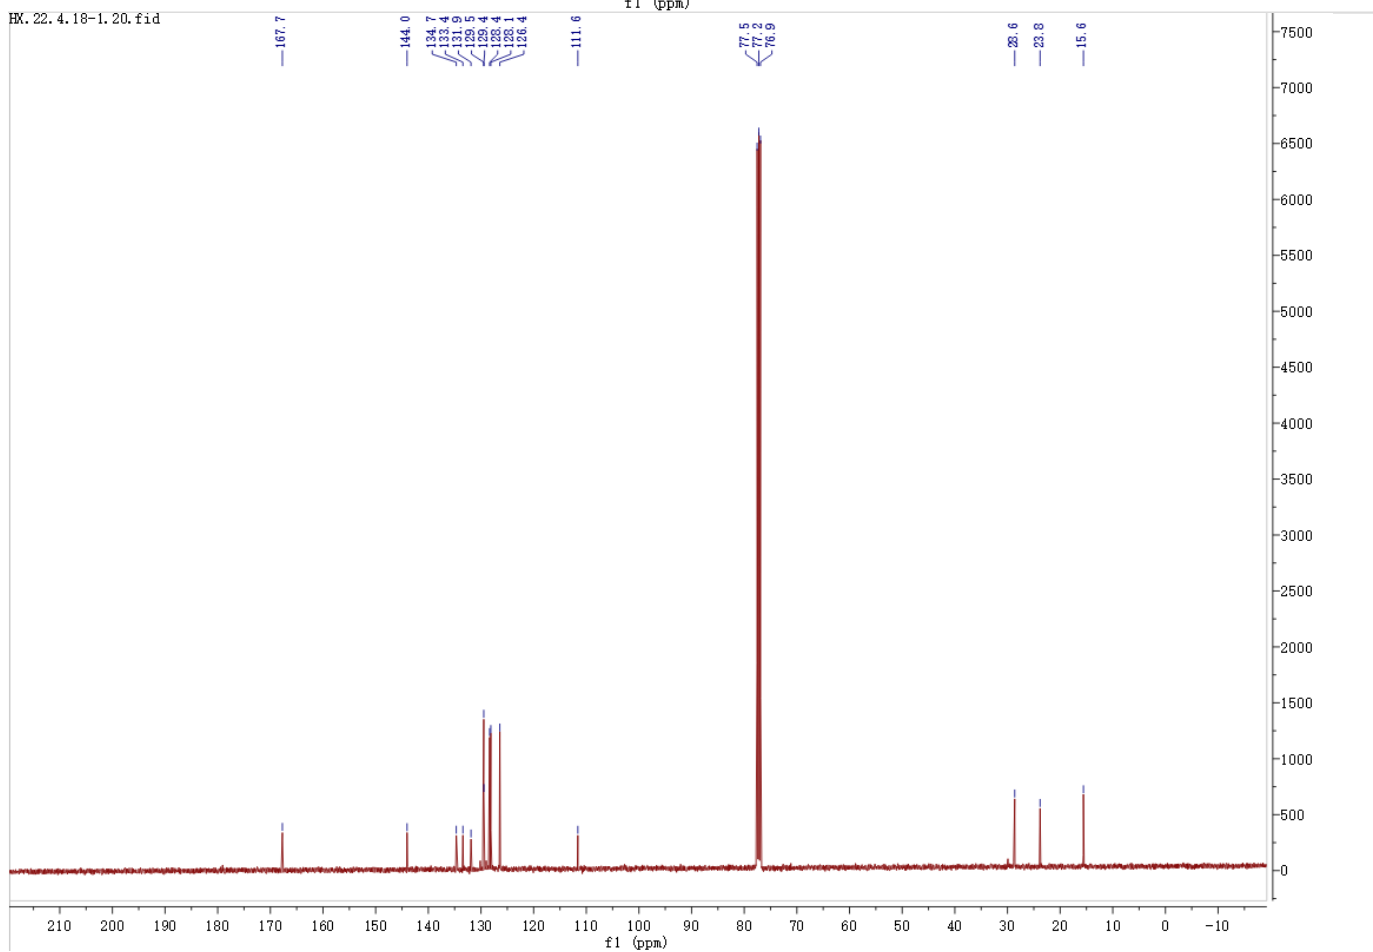

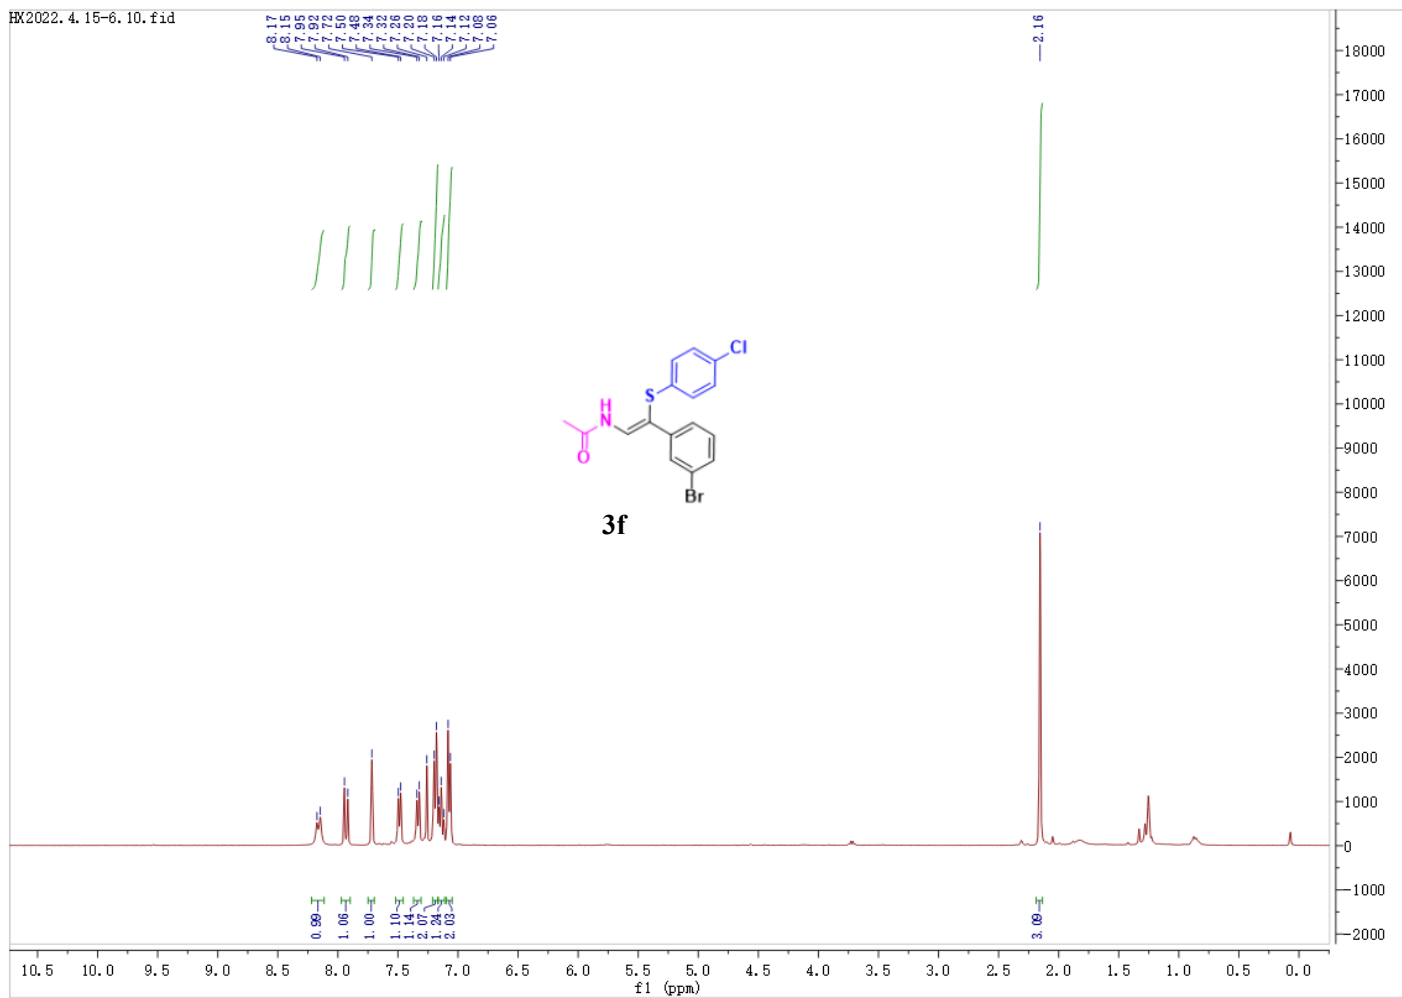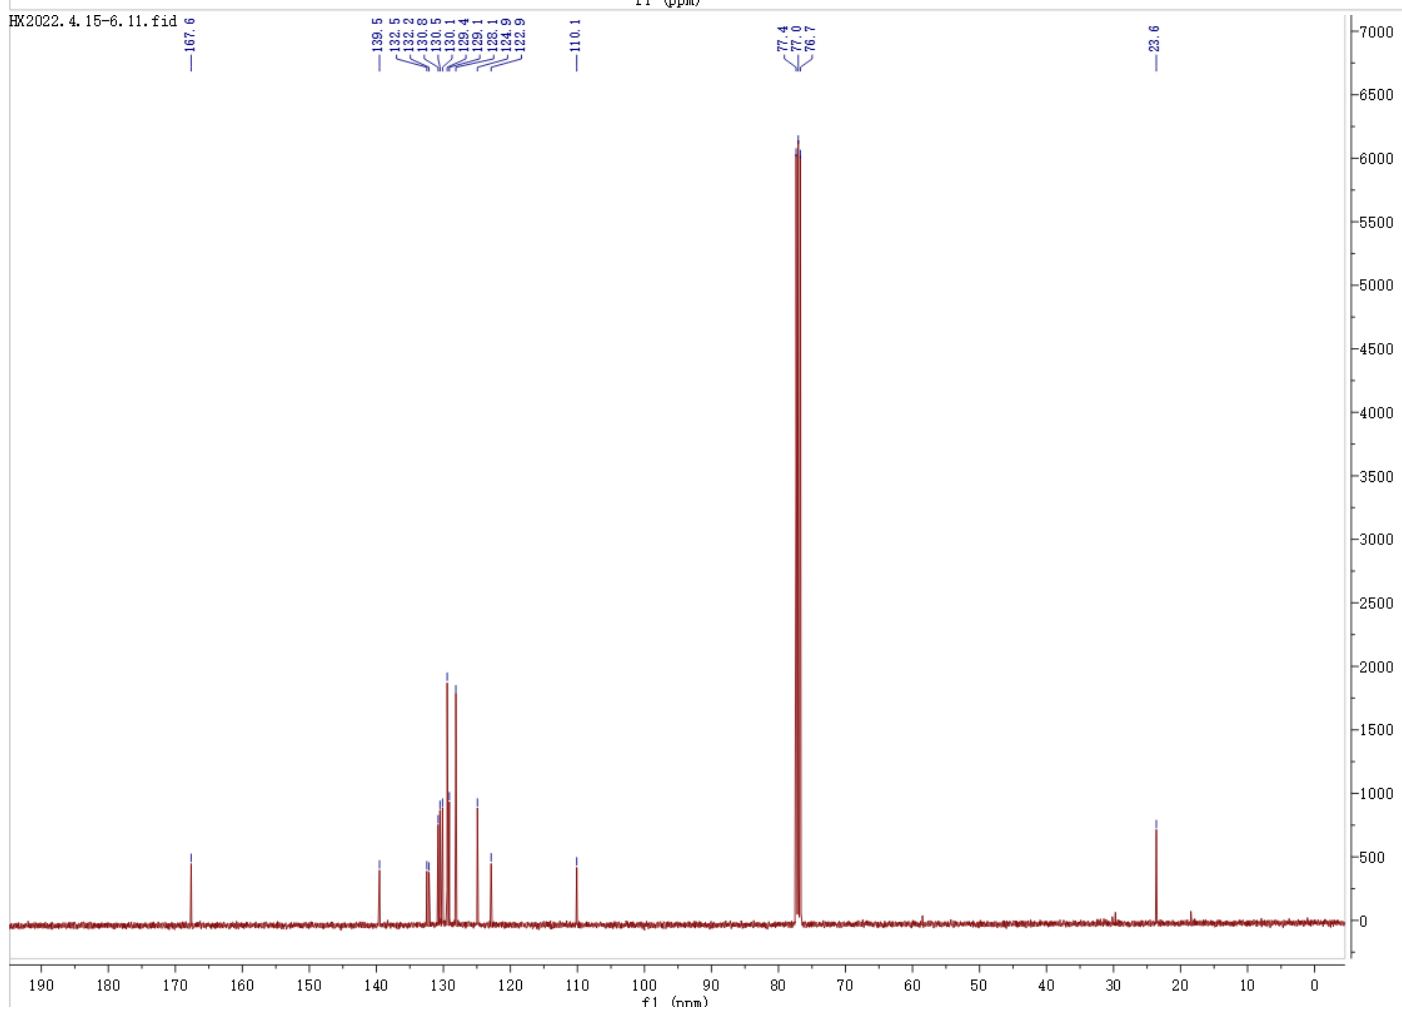

HX2022.4.15-4.10.fid

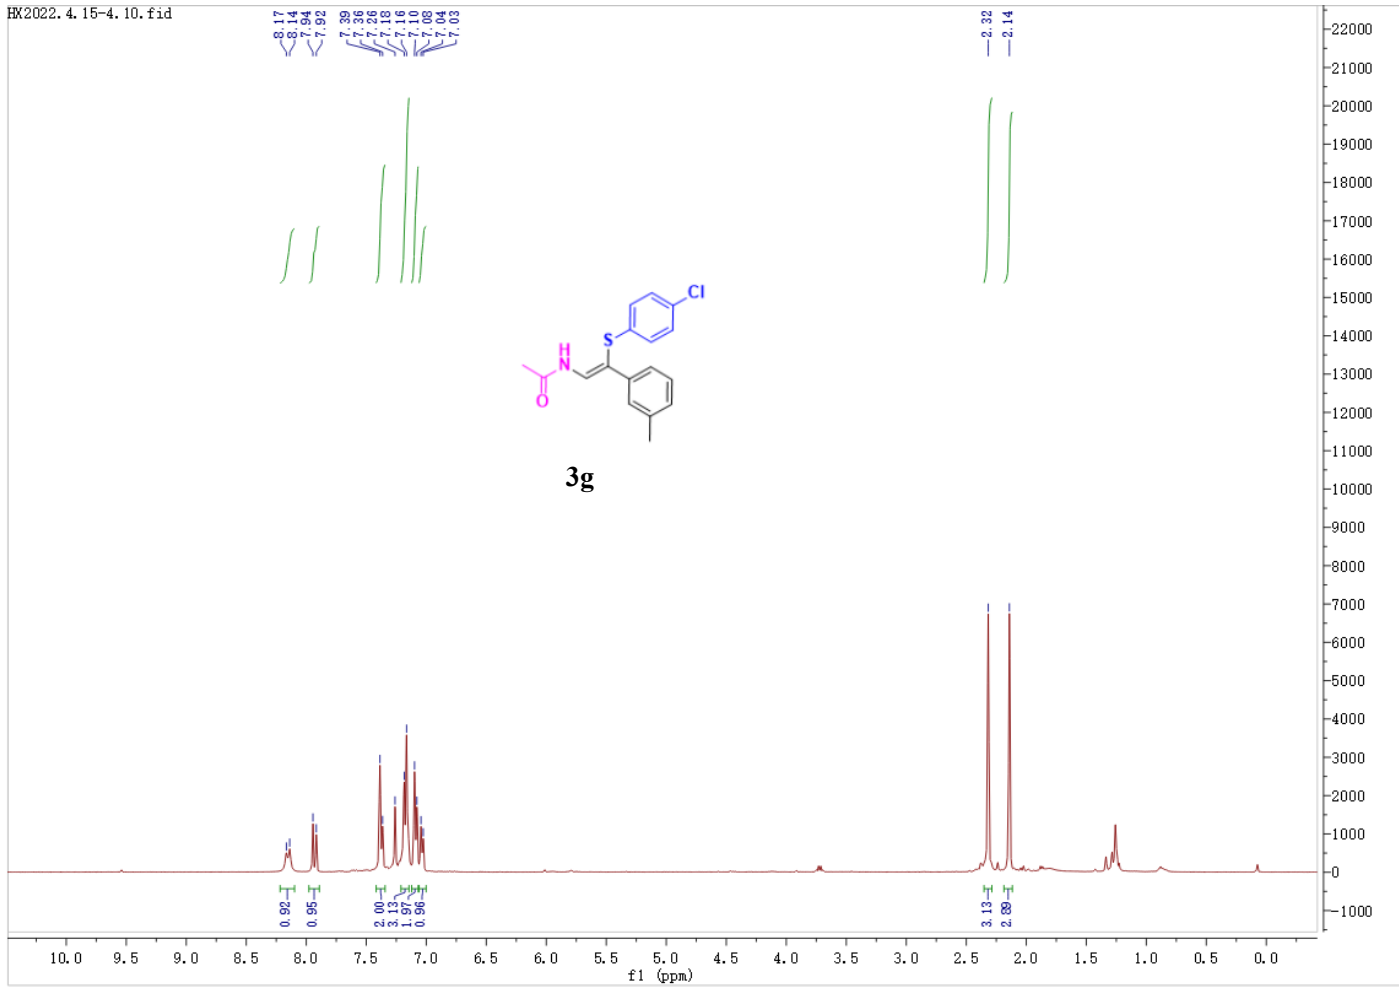

HX2022.4.15-4.11.fid

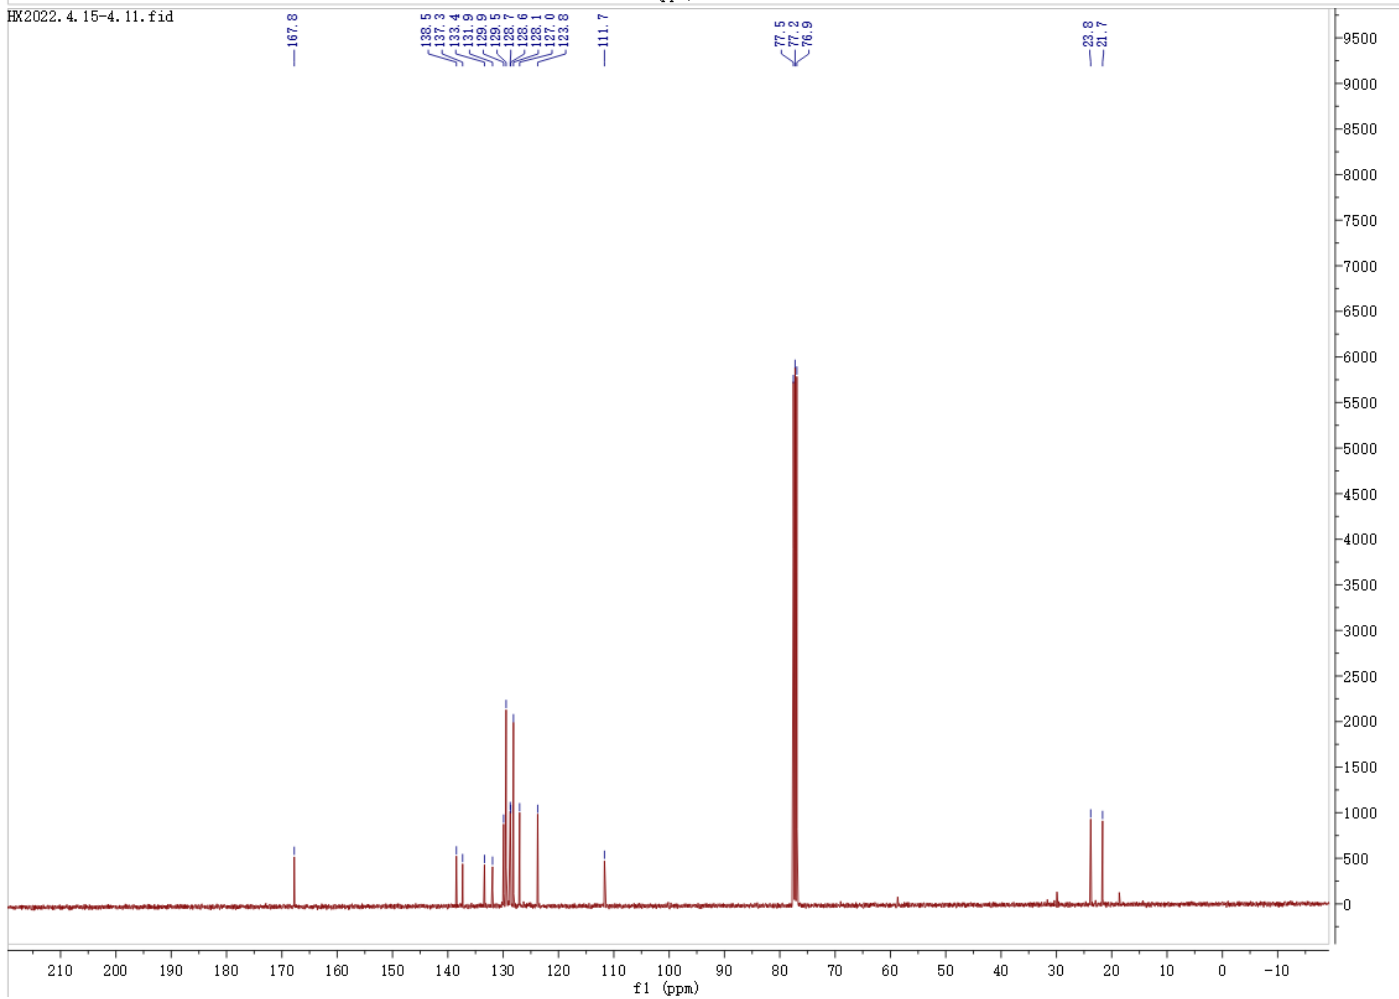



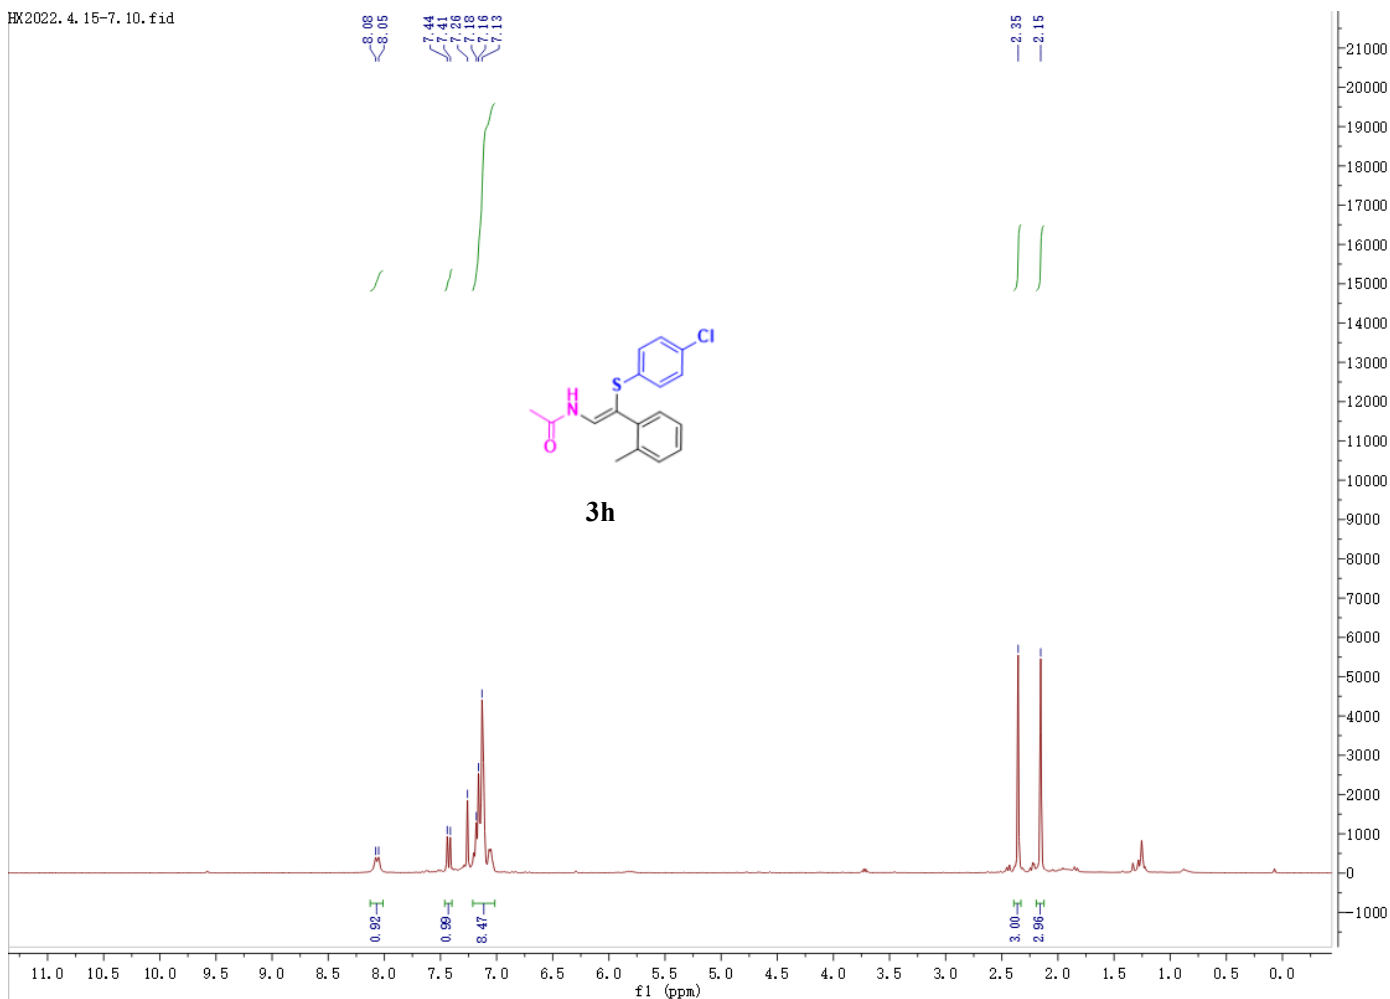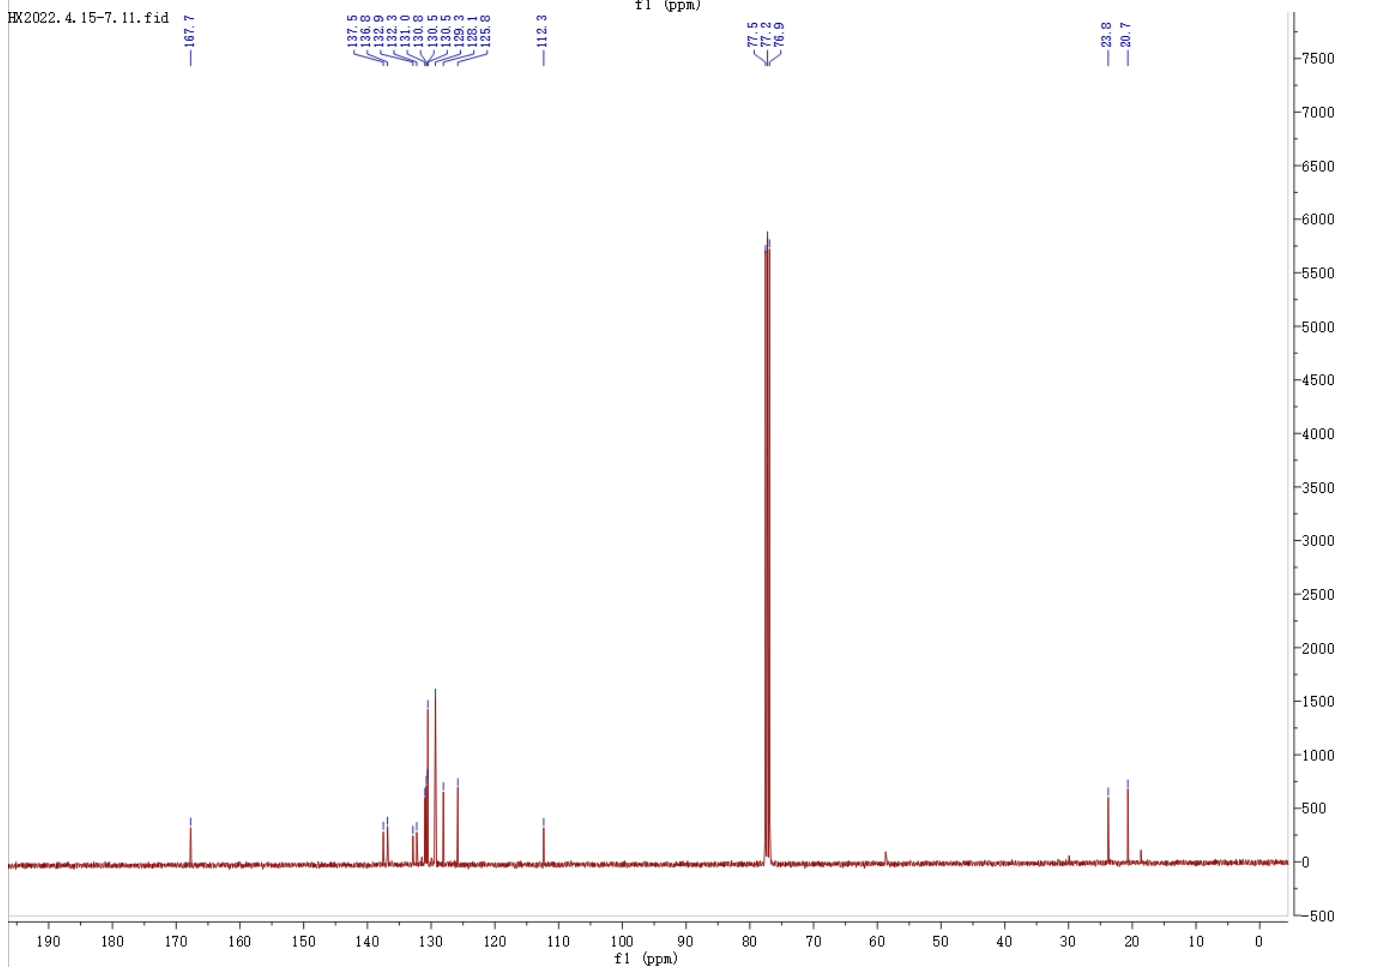

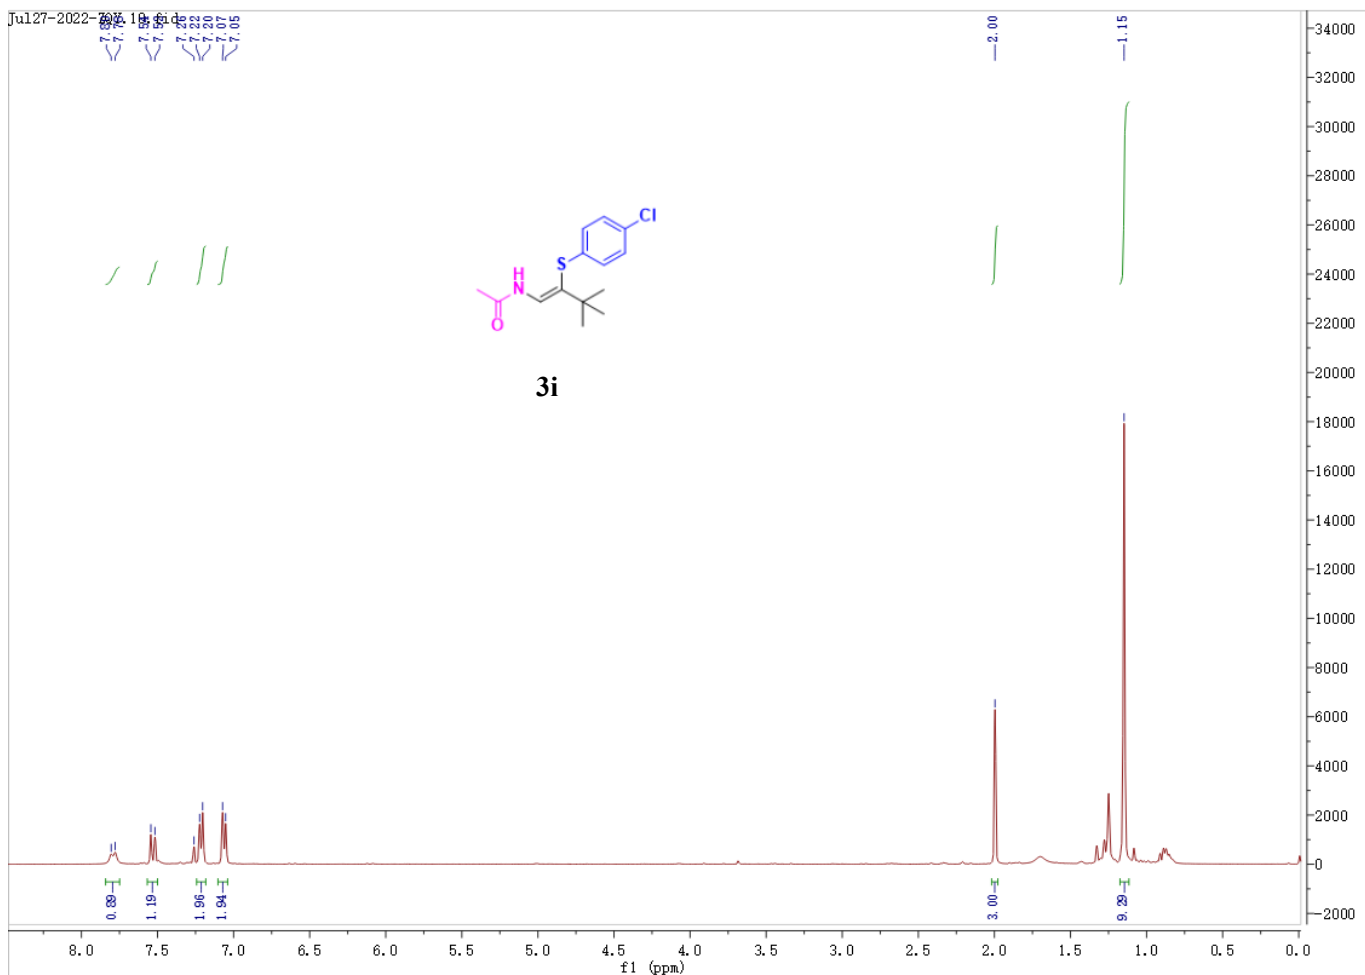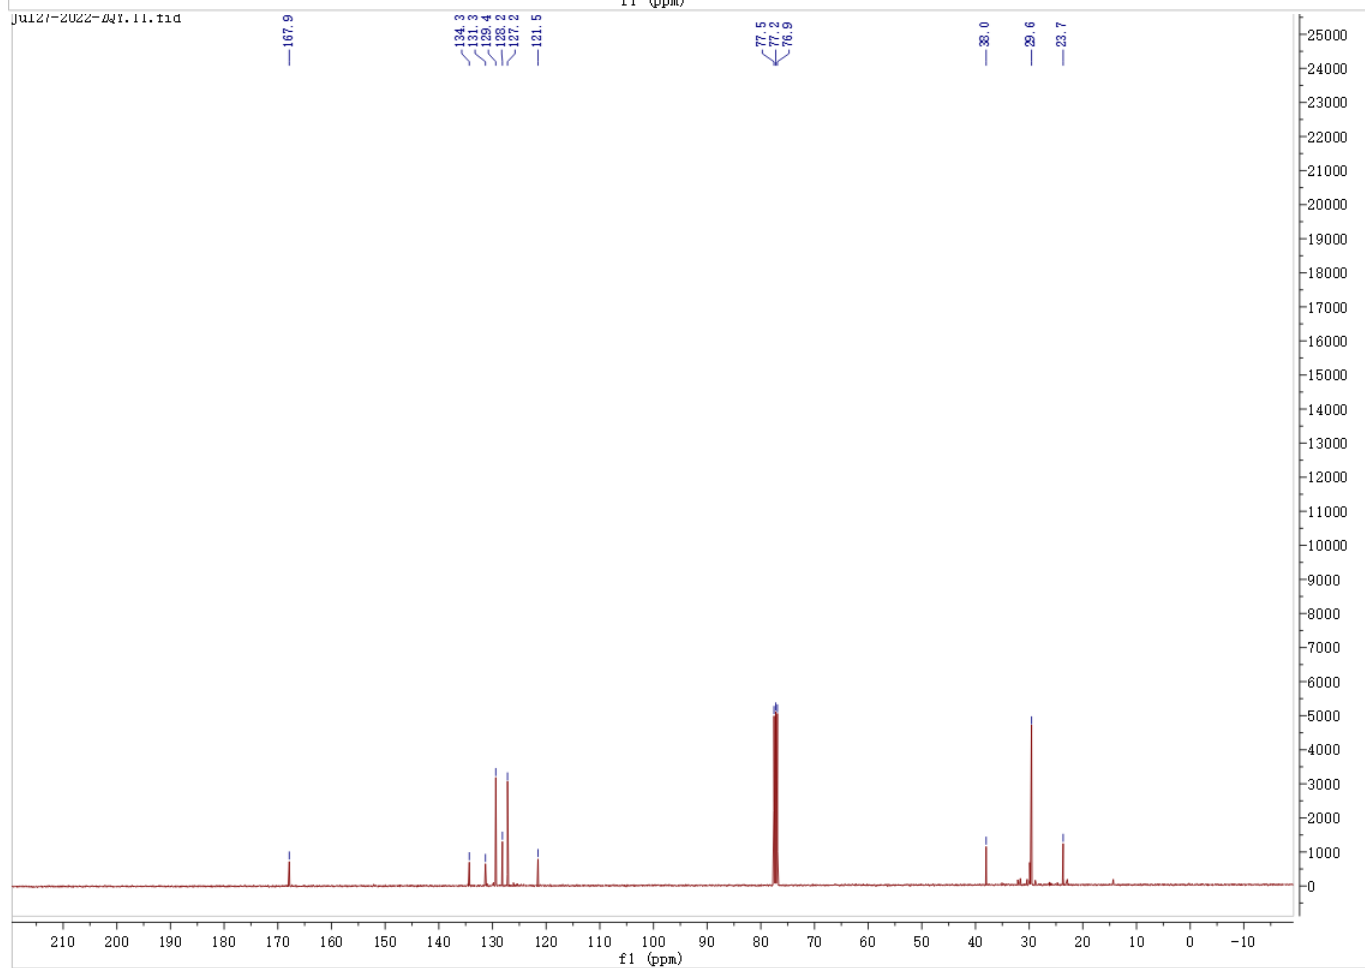

HX. 22. 4.18-11. 10.fid

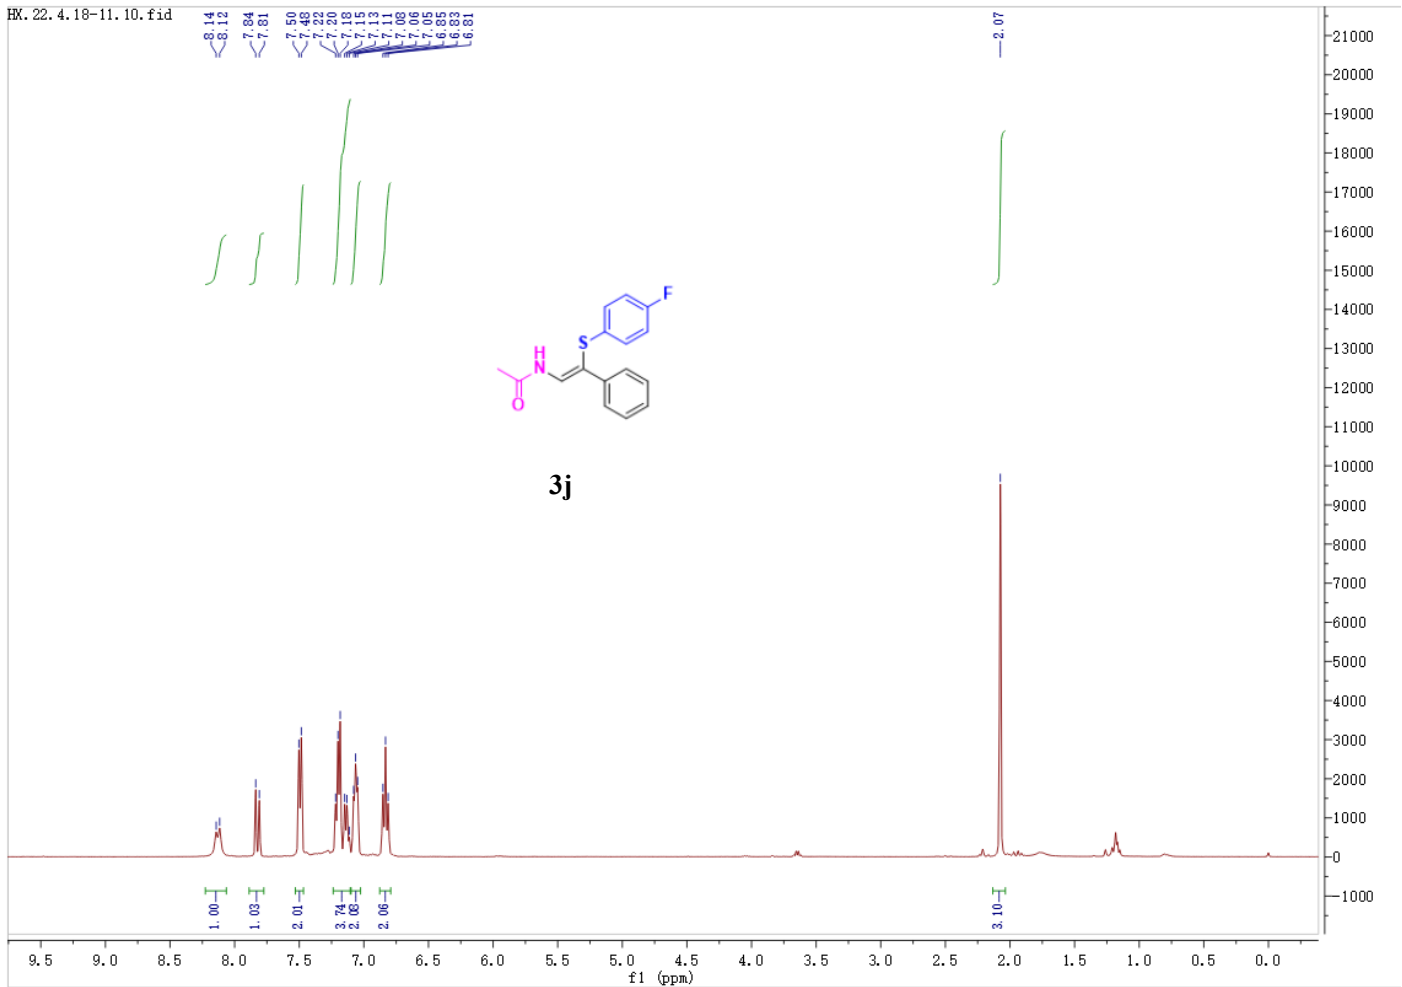

HX. 22. 4.18-11. 20.fid

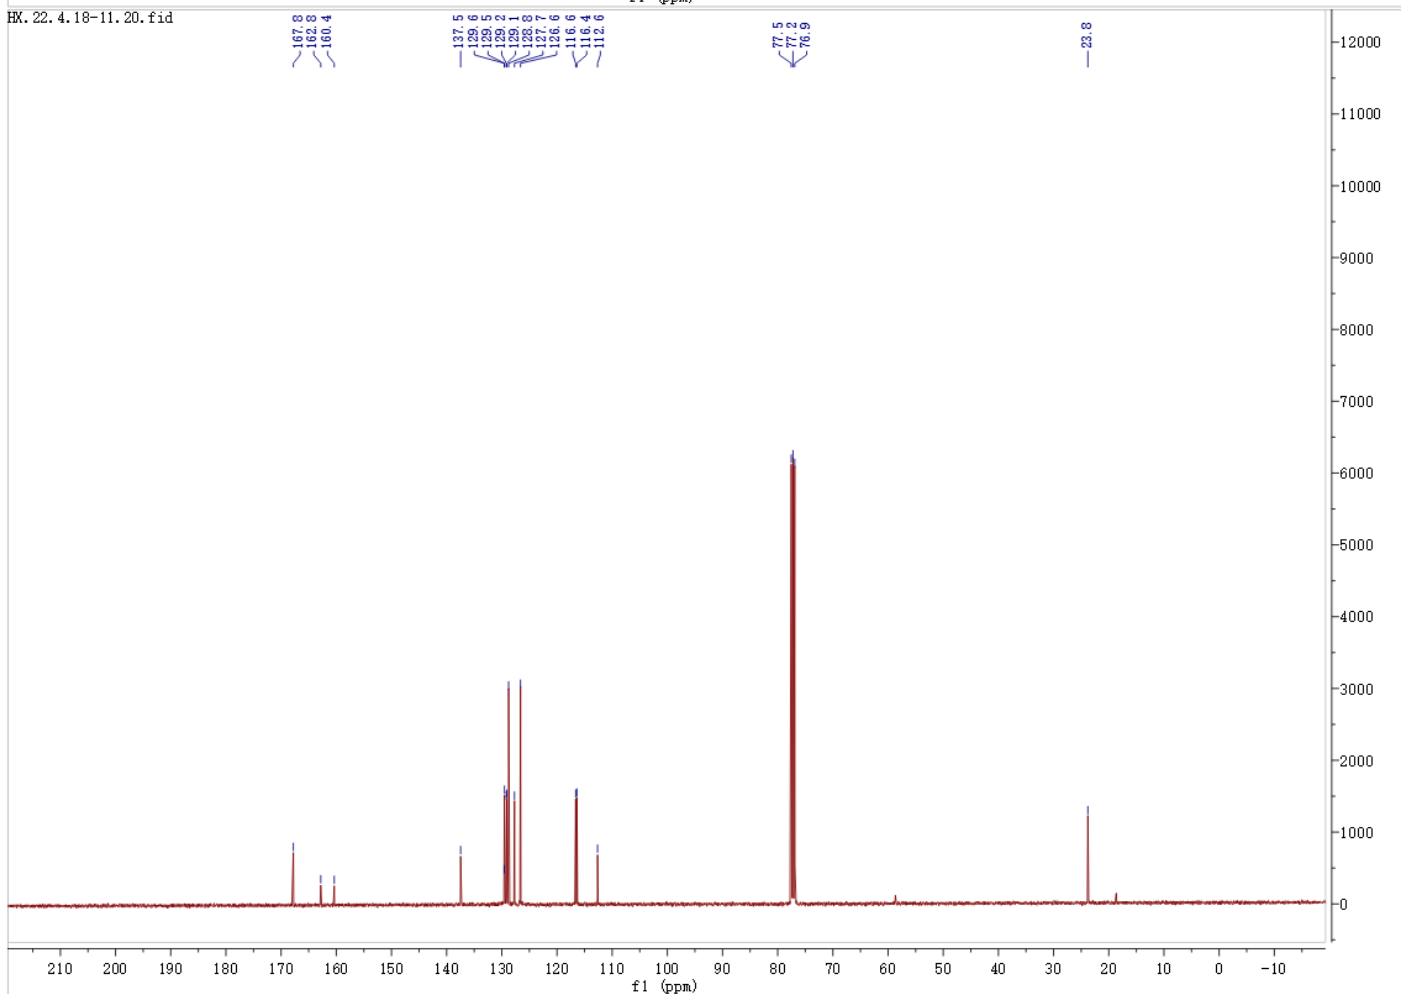

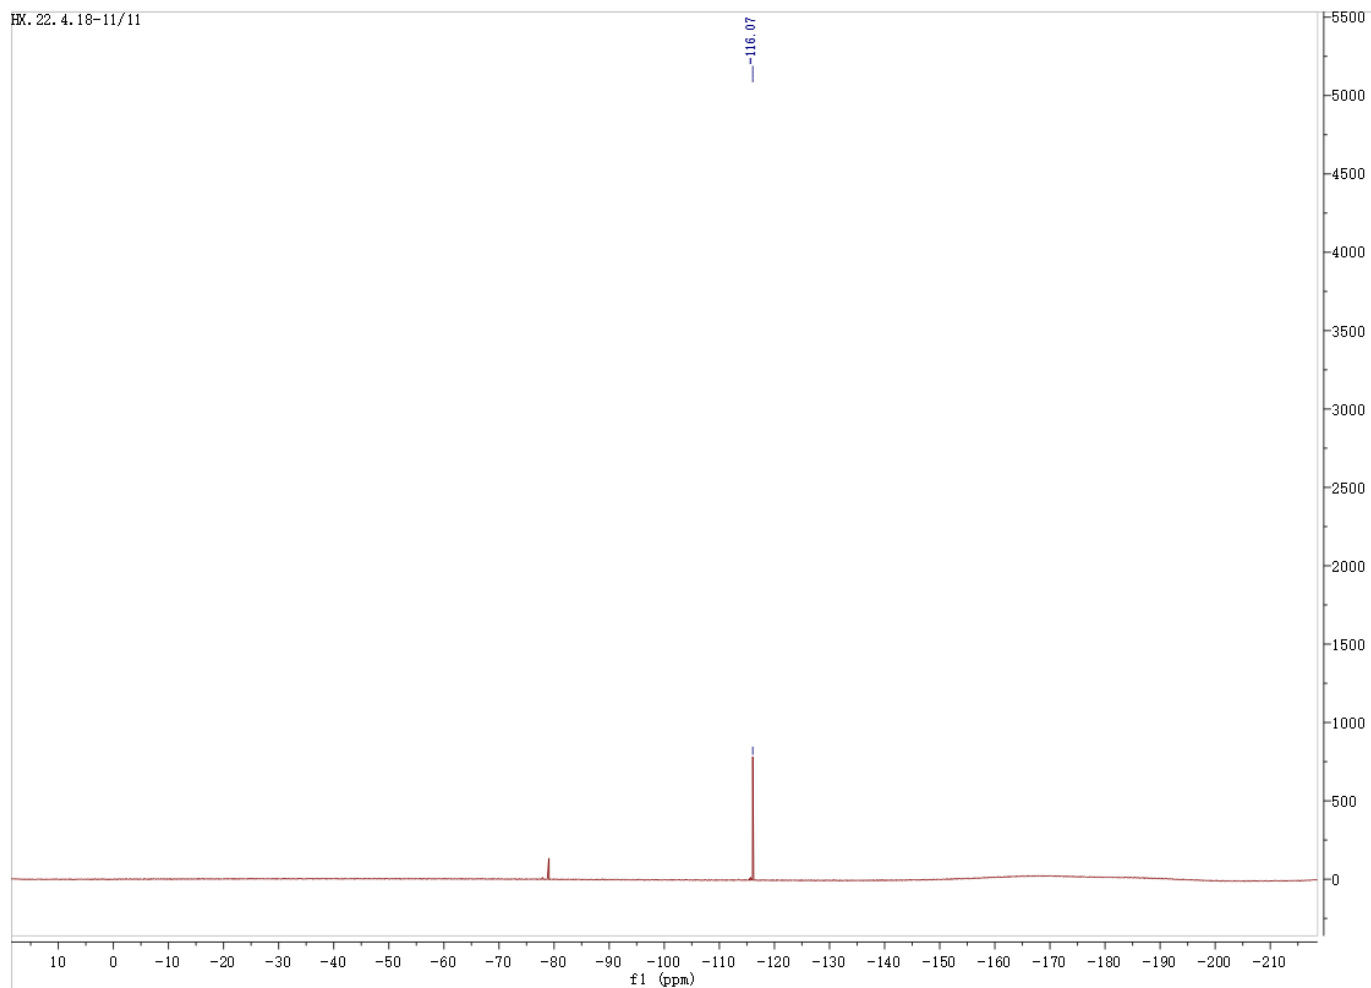

HK220427-23.10.fid

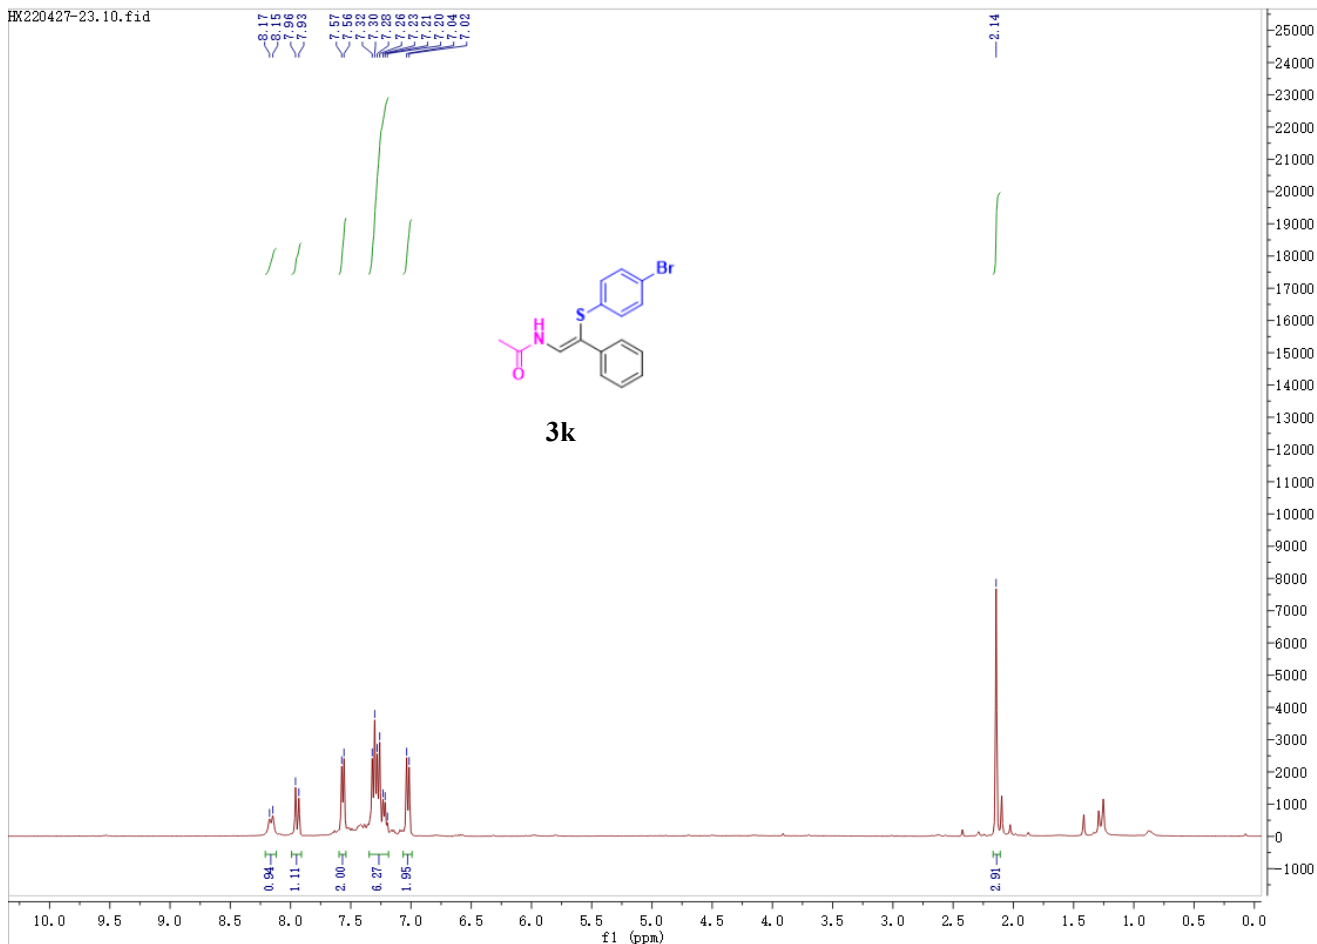

HK220427-23.20.fid

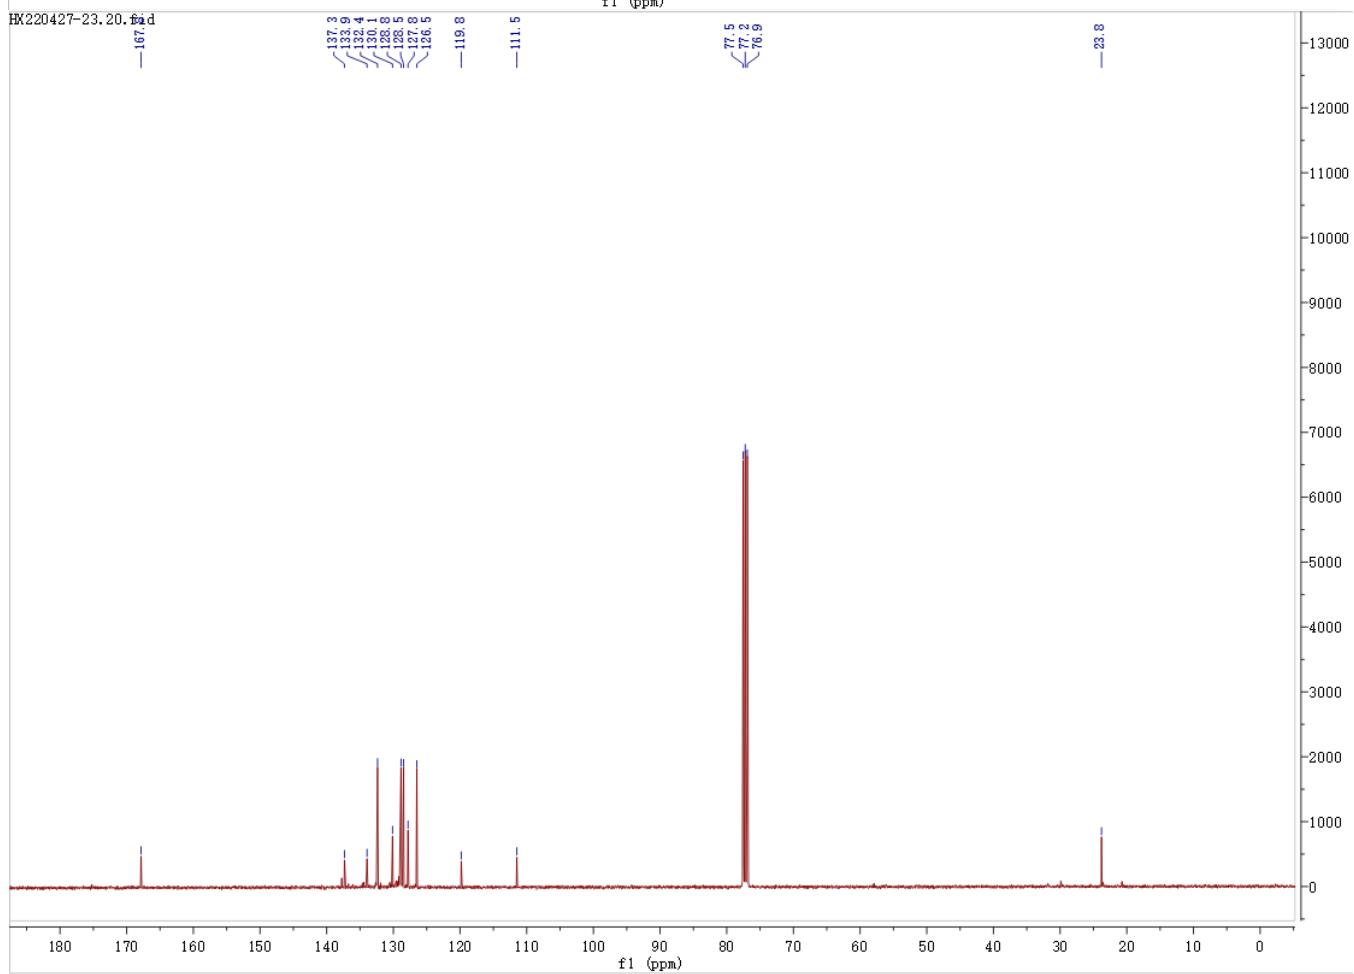

HX. 22. 4.18-13. 10.fid

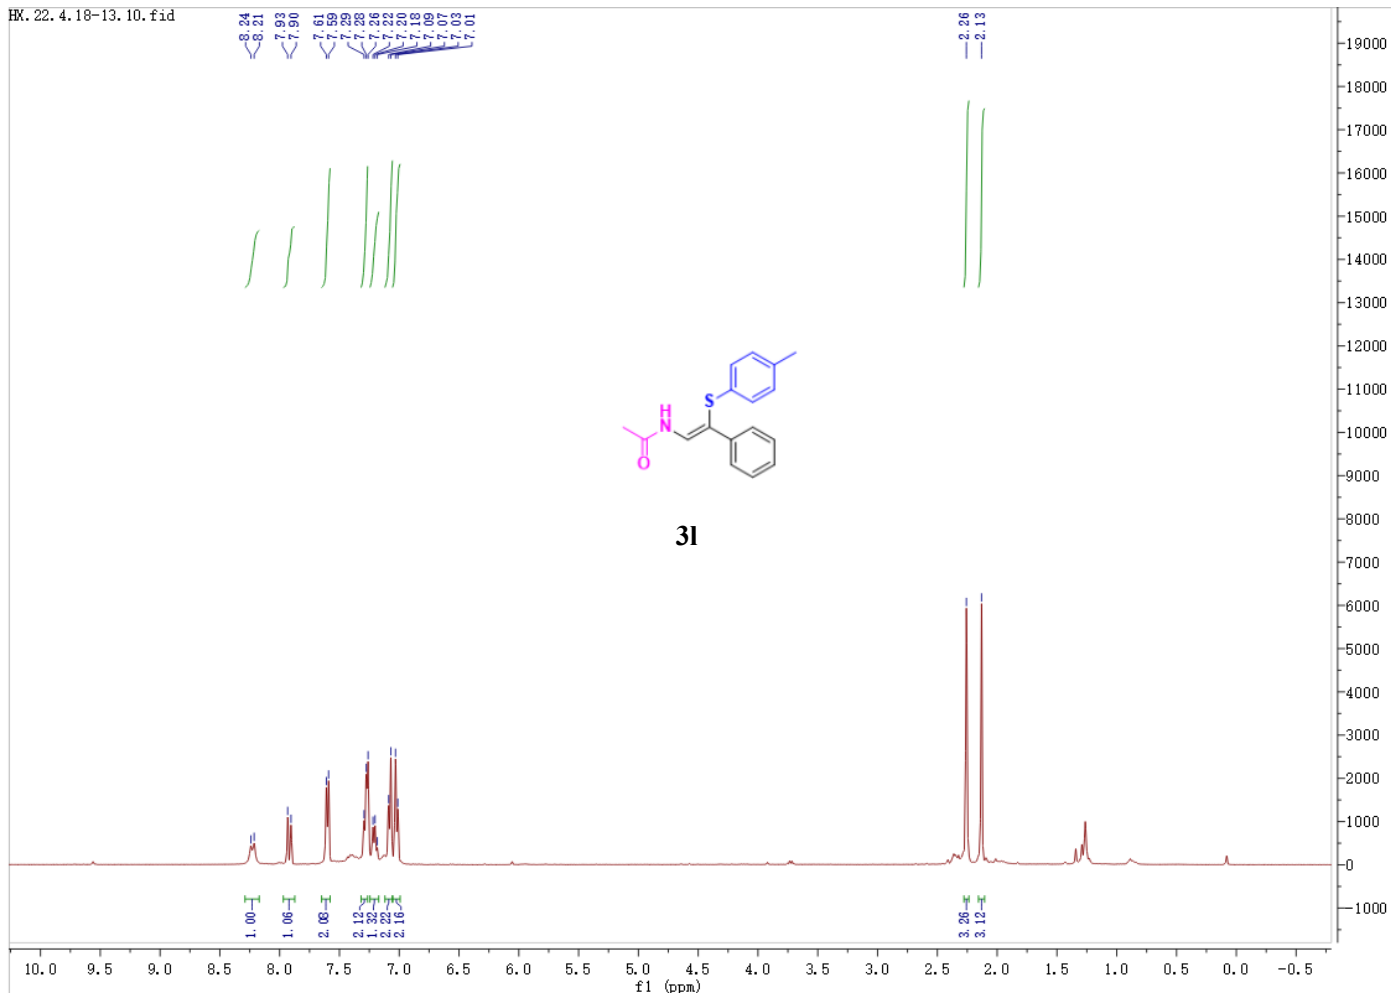

HX. 22. 4.18-13. 20.fid

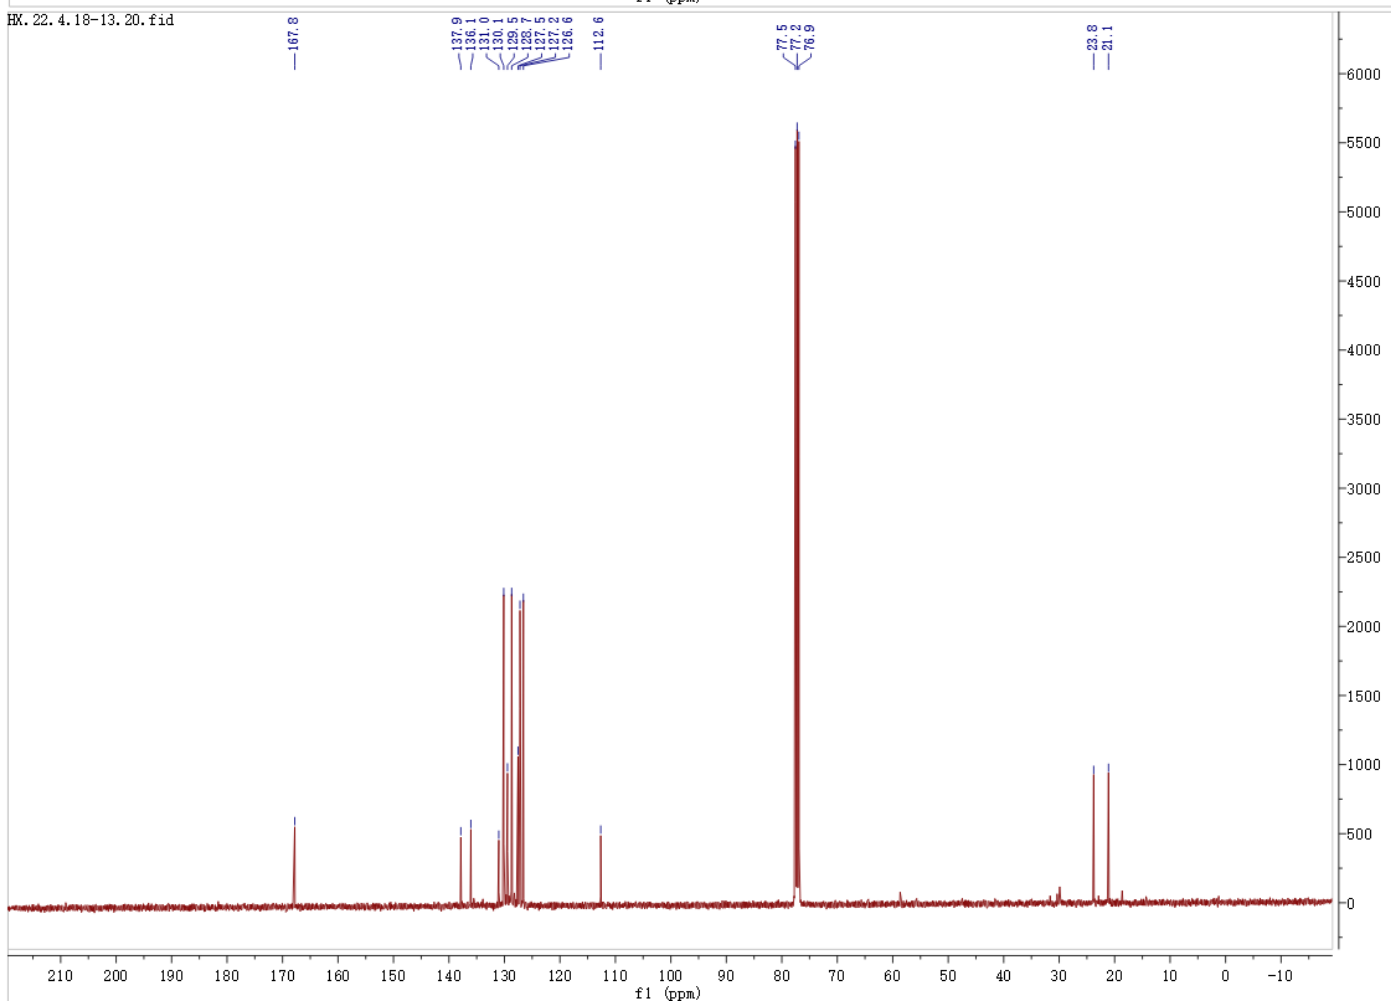

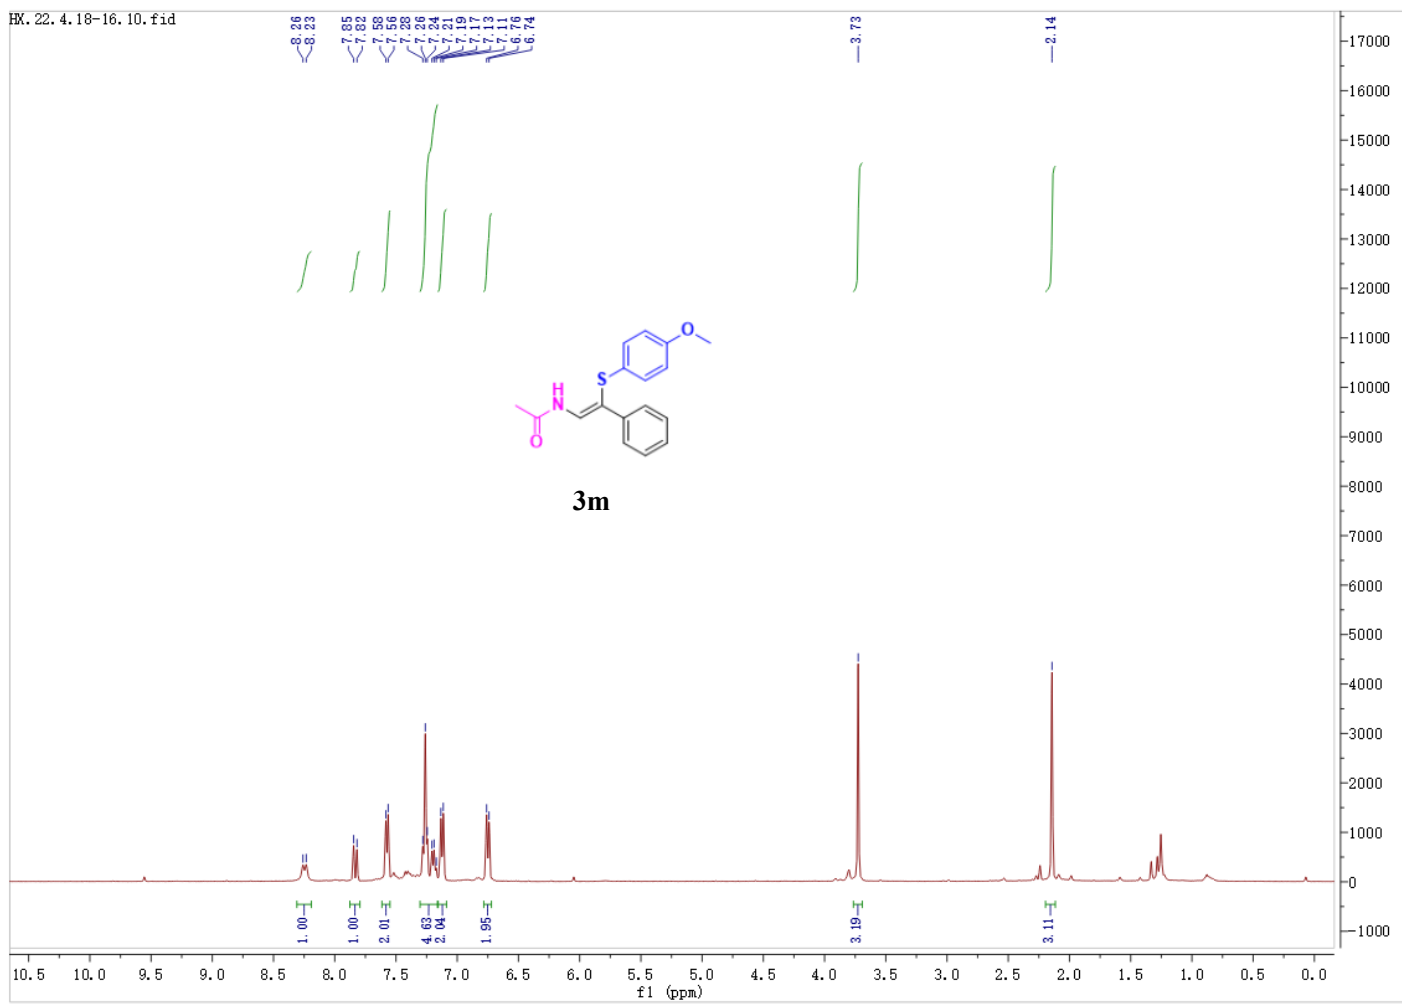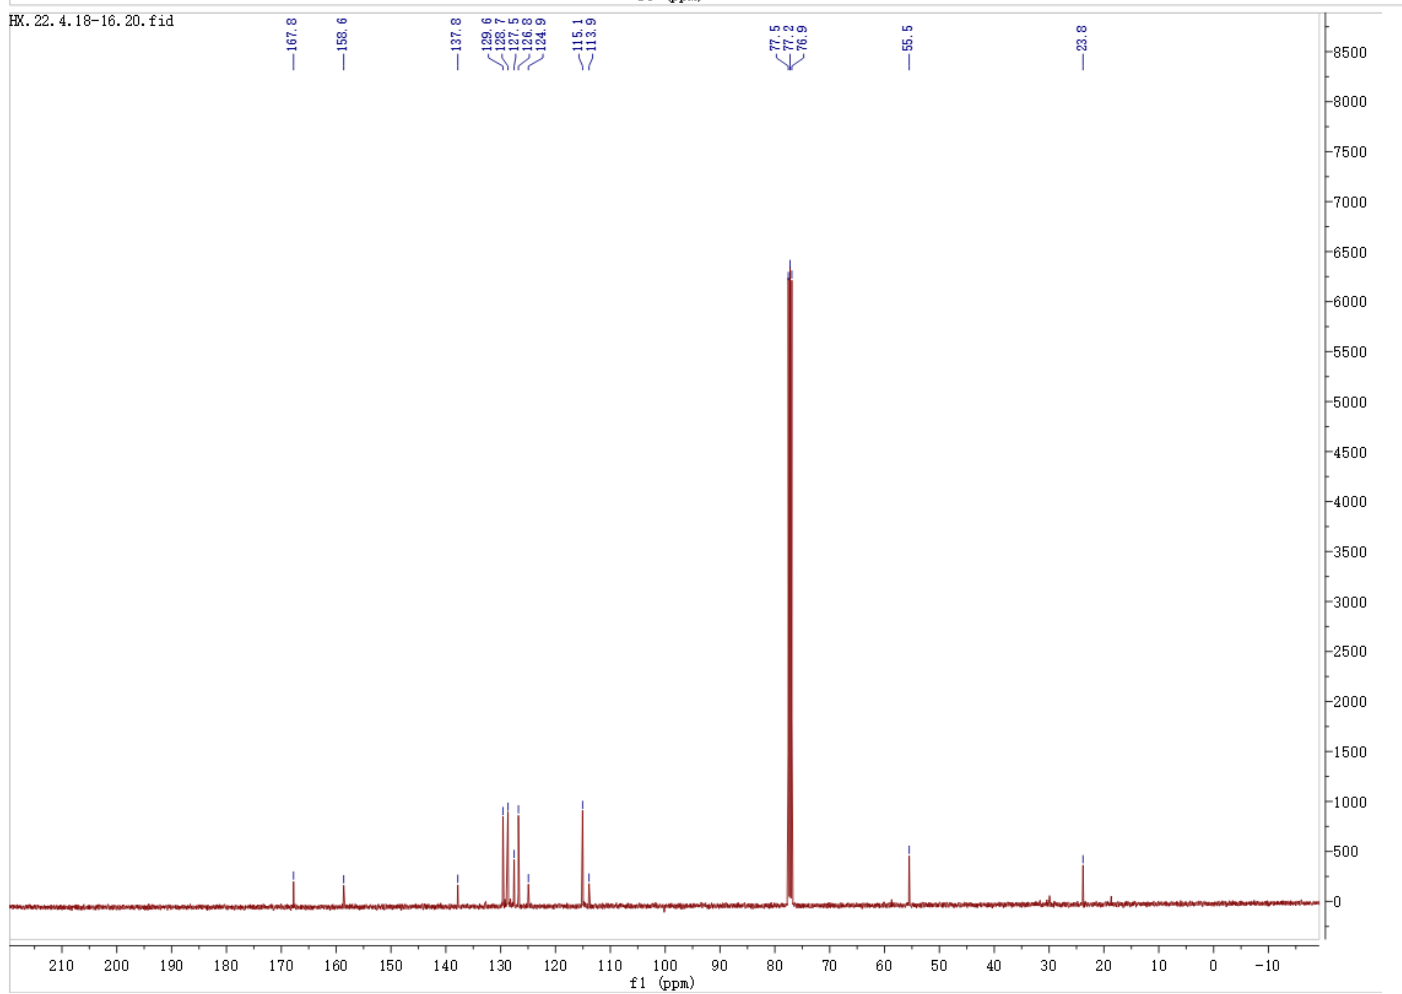

HX220427-22.10.fid

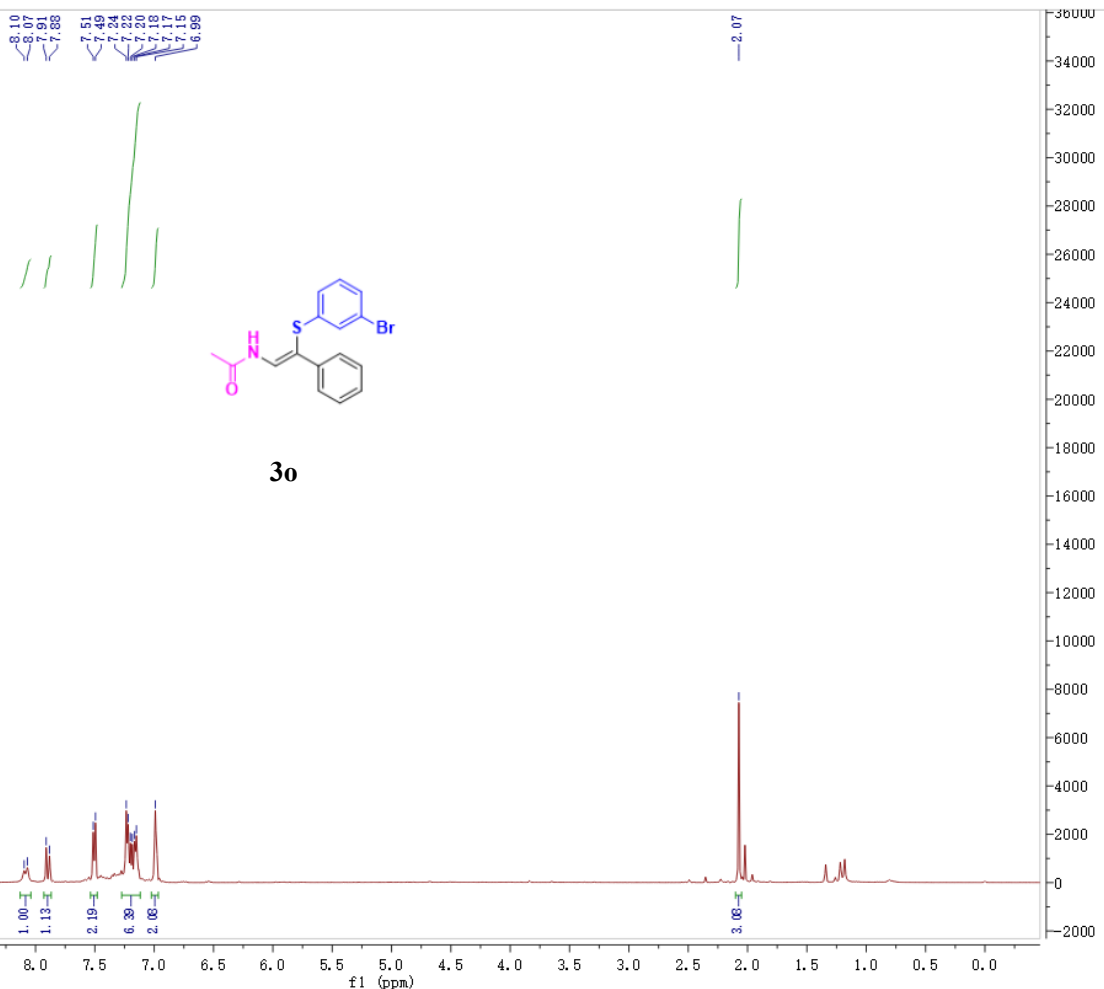

HX220427-22.20.fid

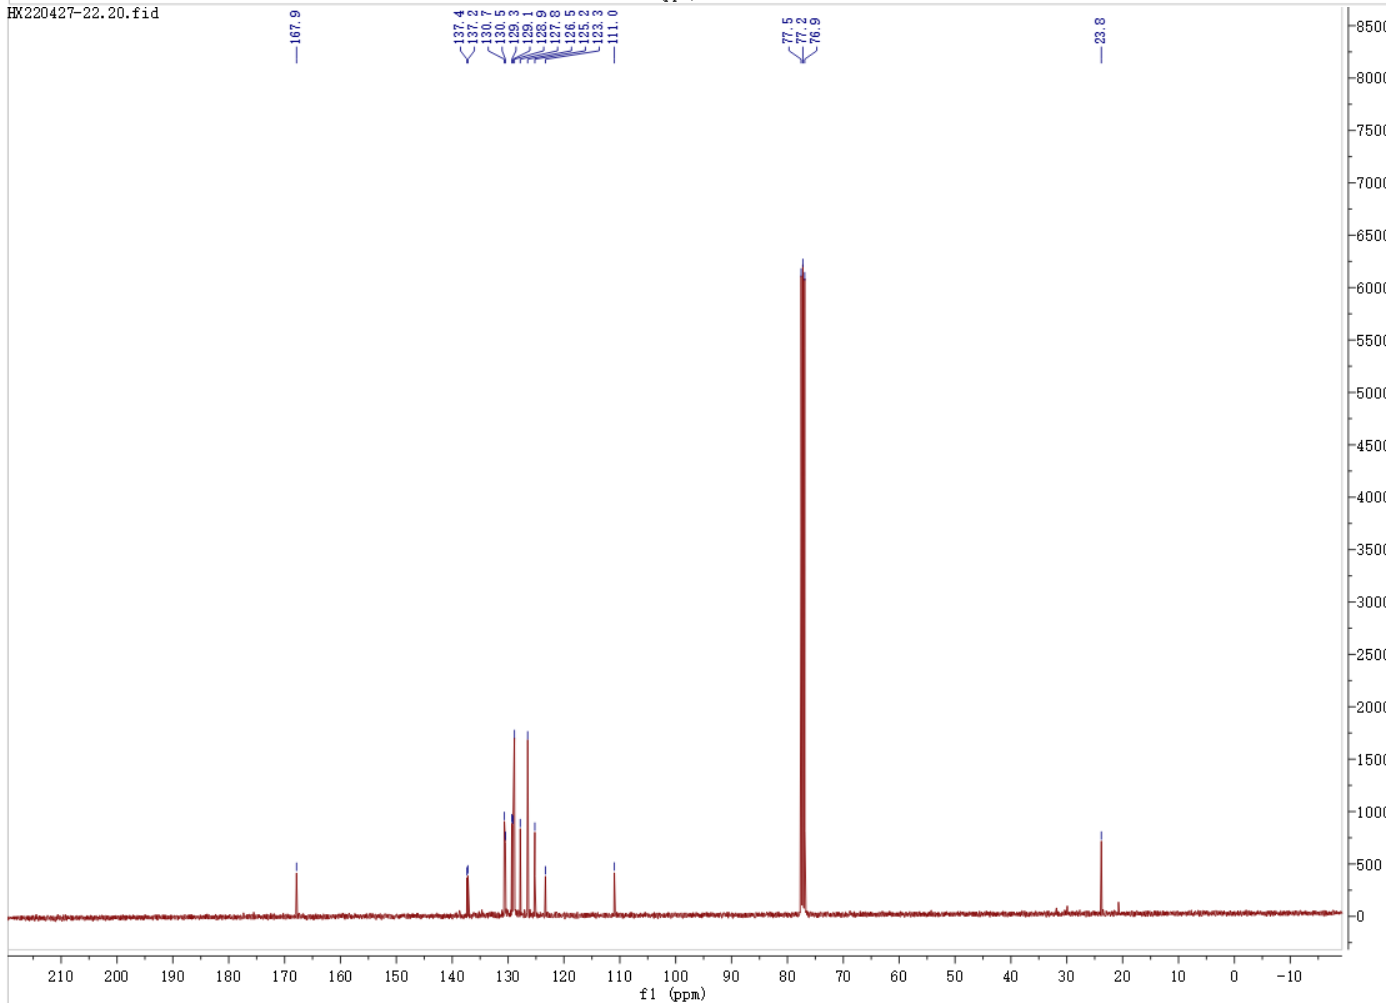



HX. 22. 4.18-14. 10. fid

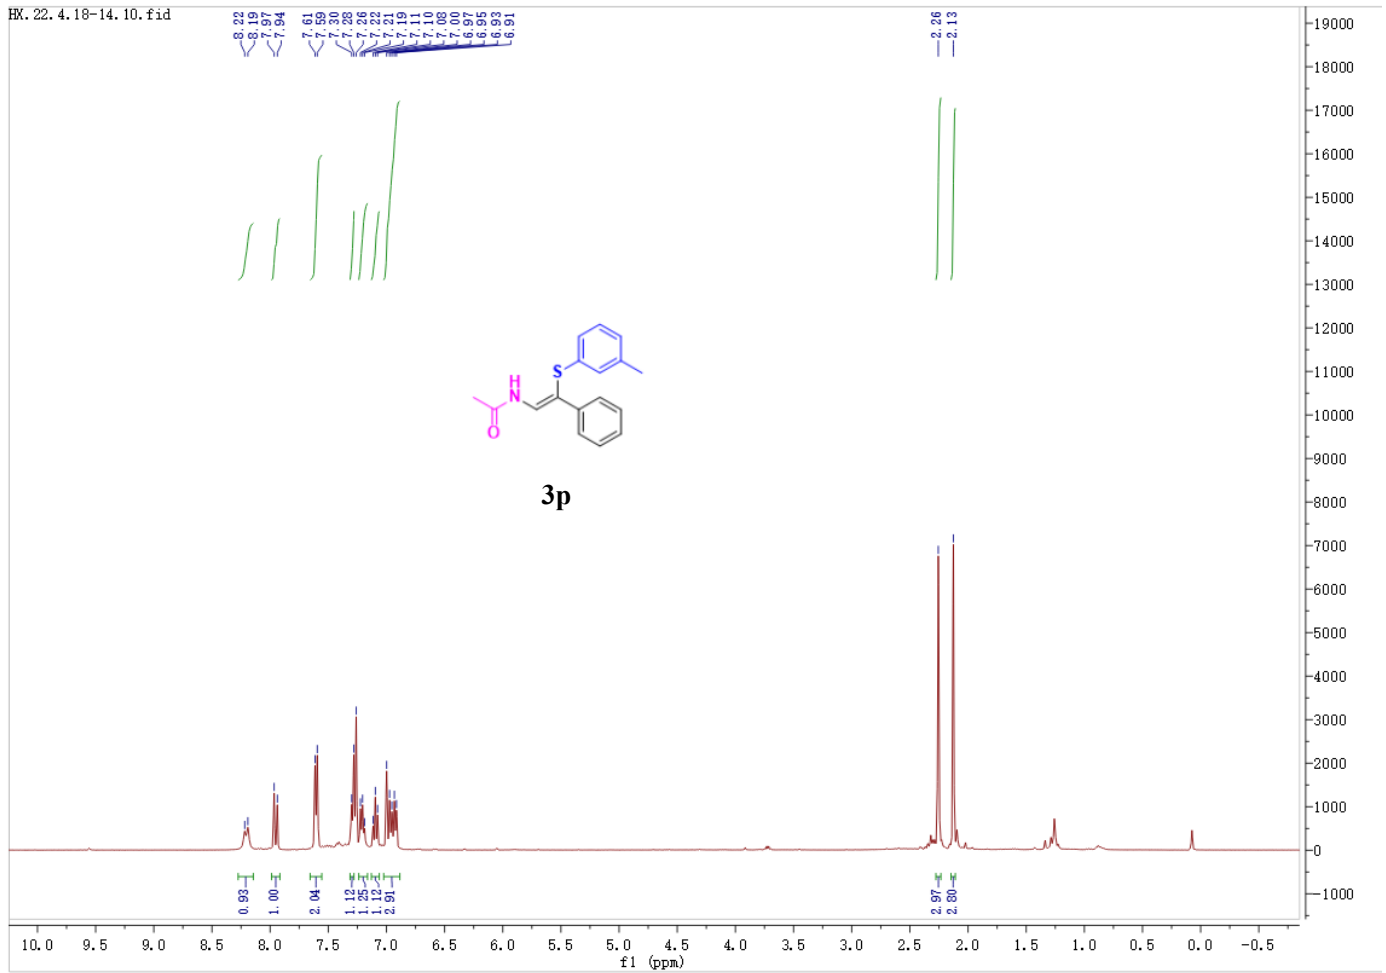

HX. 22. 4.18-14. 20. fid

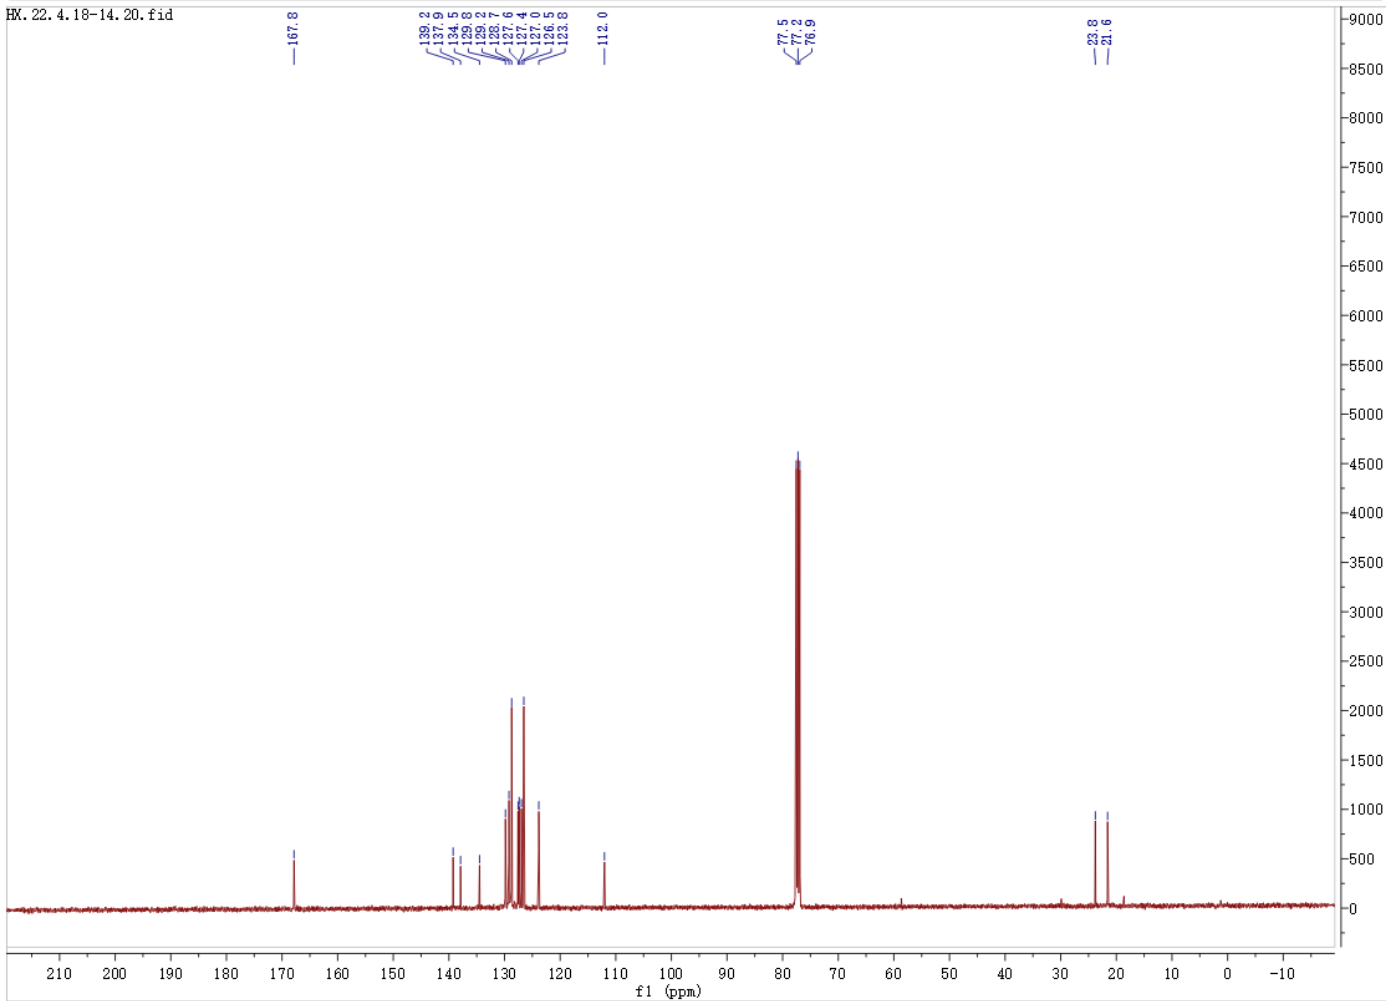

HX. 22. 4.18-15. 10. fid

8.19  
8.14  
8.04  
8.01  
7.62  
7.60  
7.38  
7.35  
7.33  
7.30  
7.28  
7.26  
7.24  
7.23  
7.16  
7.04  
6.98  
6.98

2.14

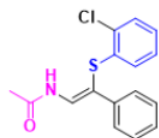

3q

HX. 22. 4.18-15. 20. fid

167.9  
137.4  
134.0  
132.0  
129.9  
128.9  
127.8  
127.6  
127.3  
126.9  
126.4  
110.5  
77.5  
77.3  
76.9  
23.8

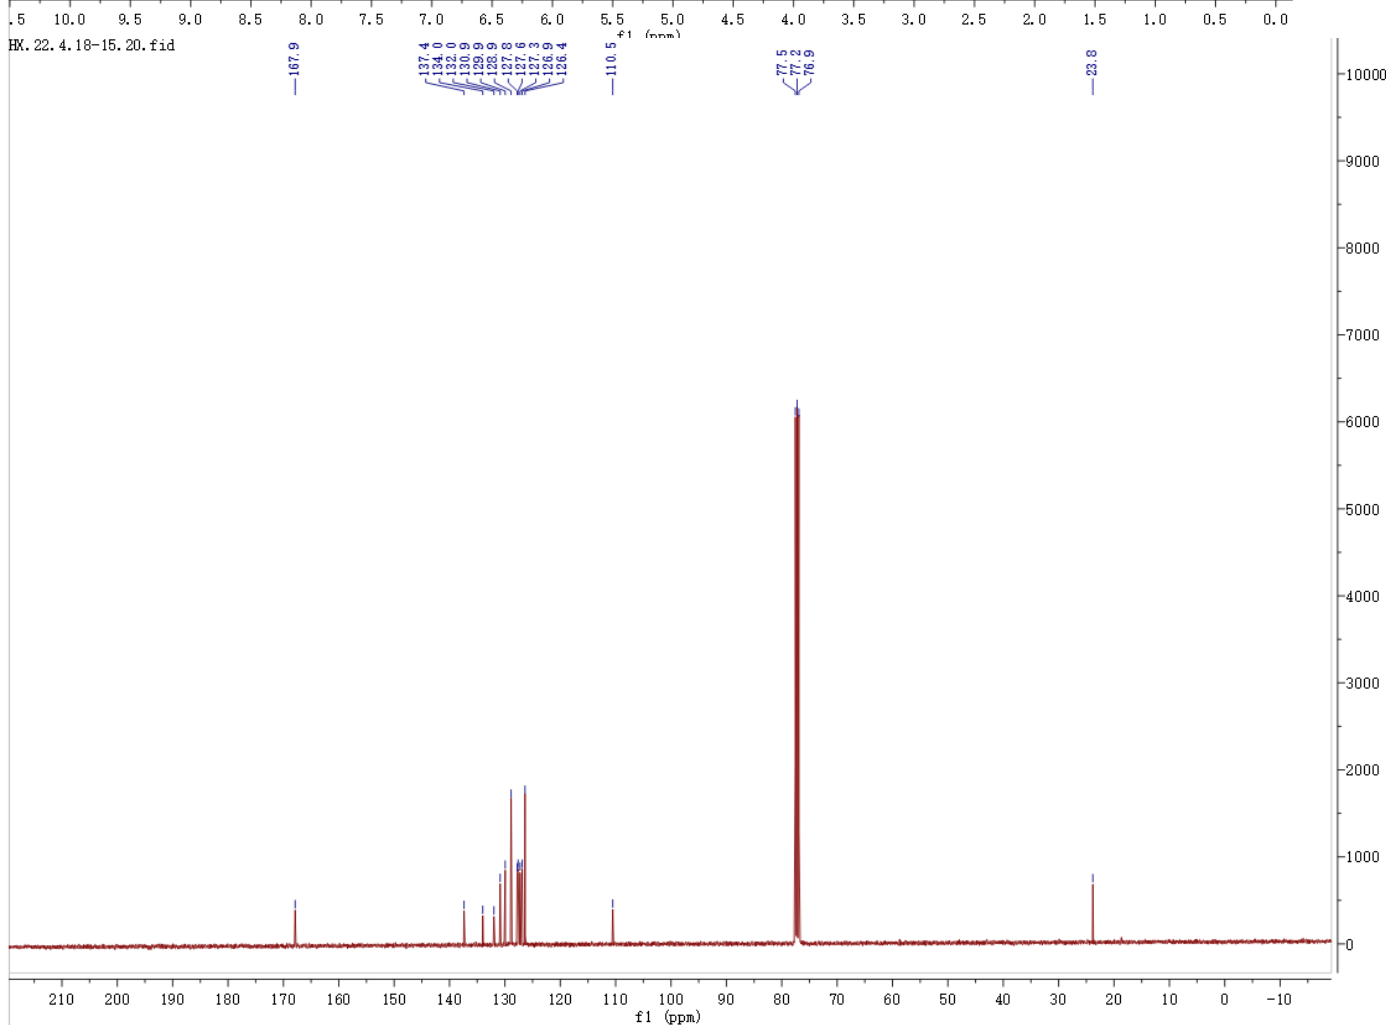

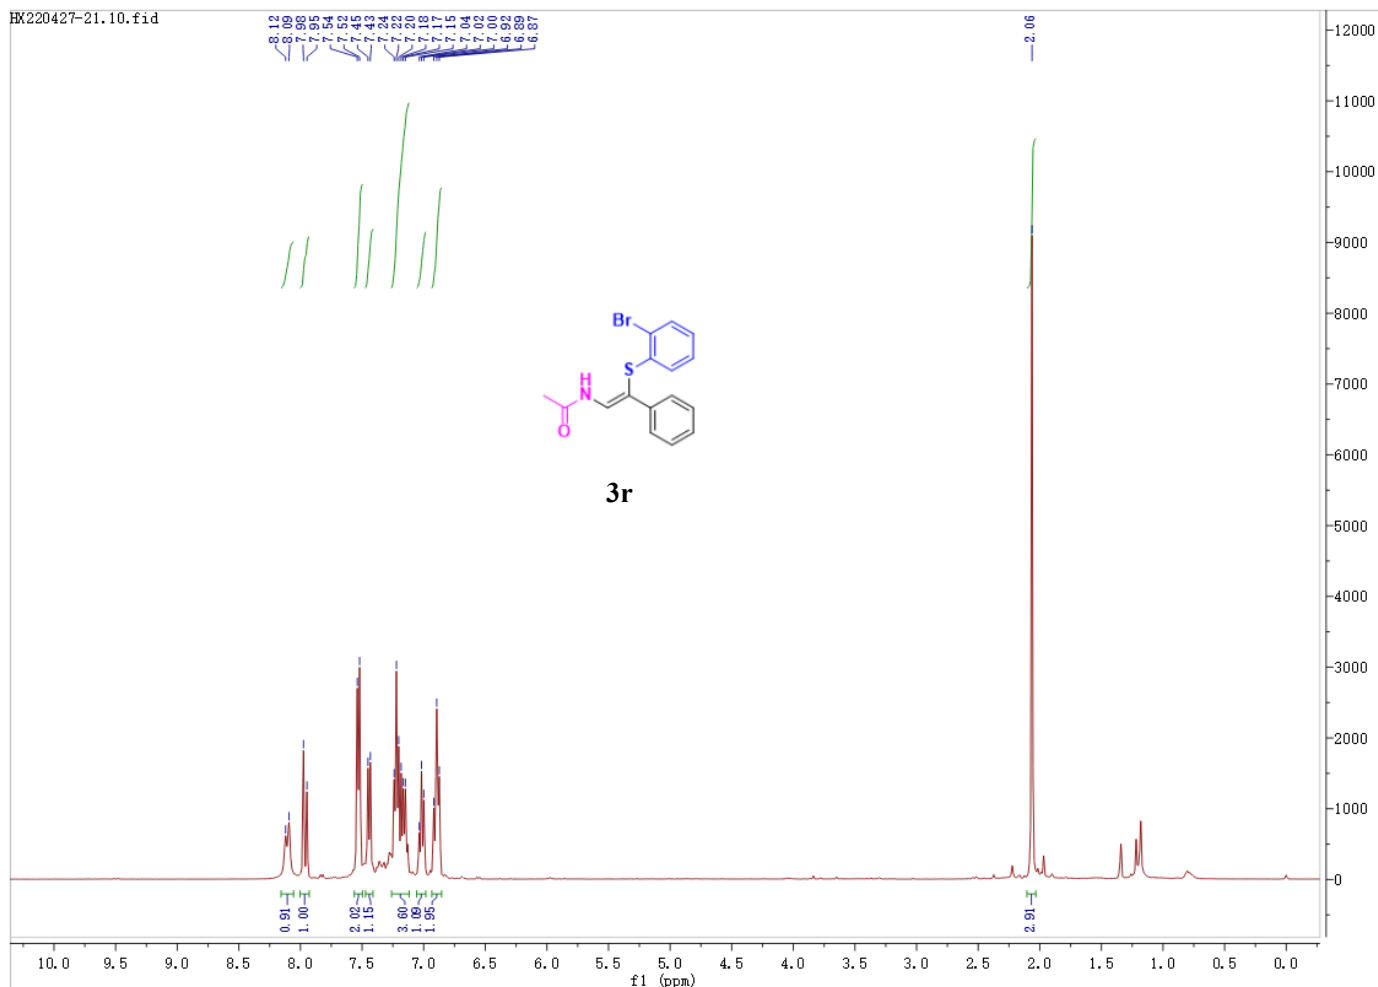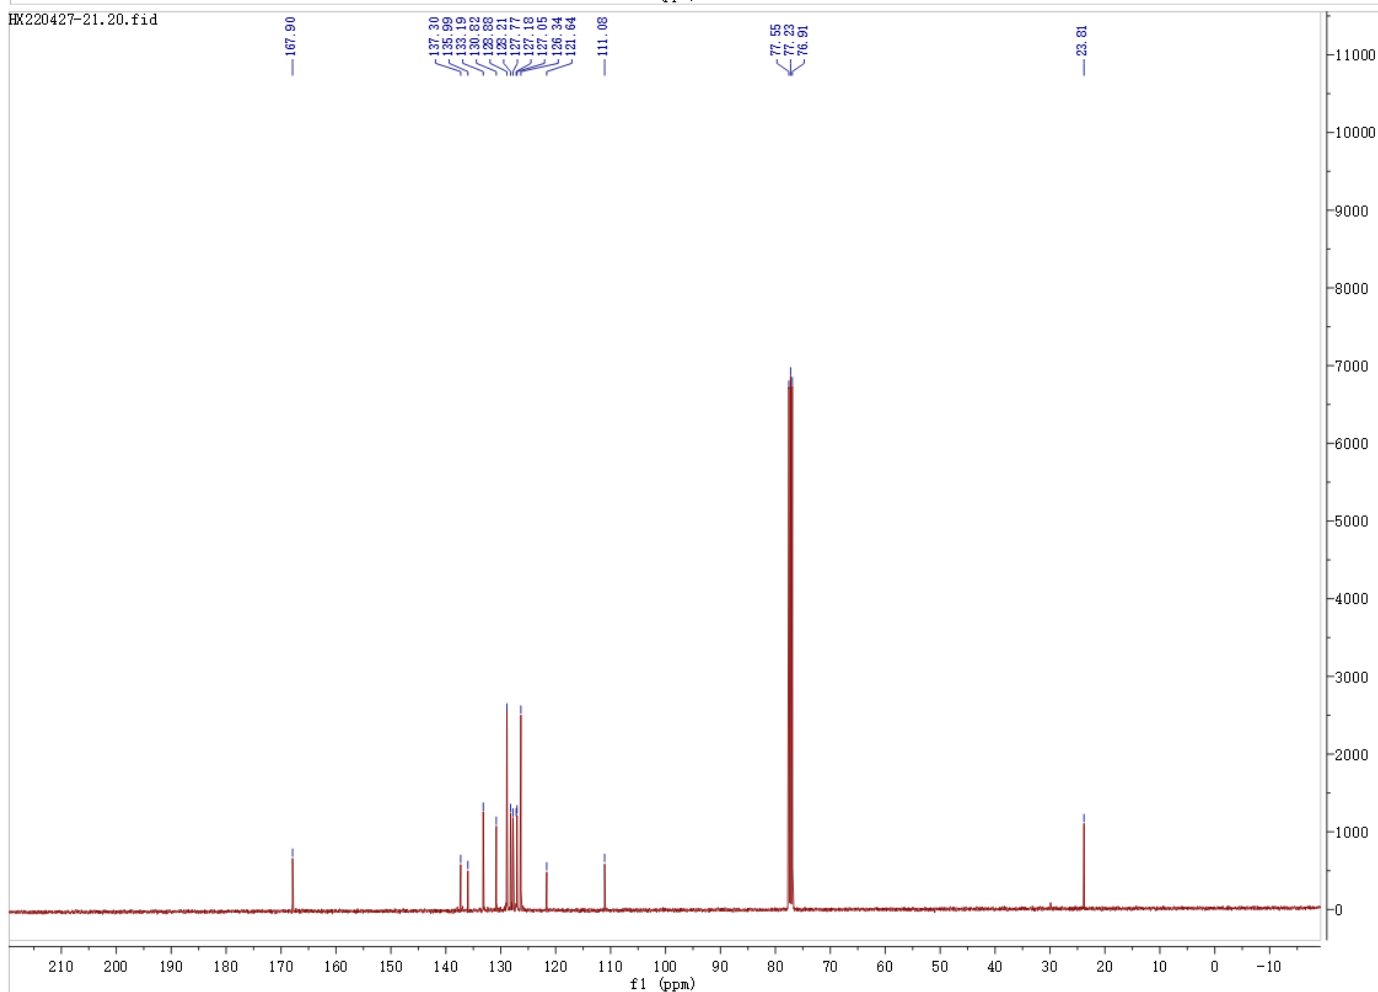

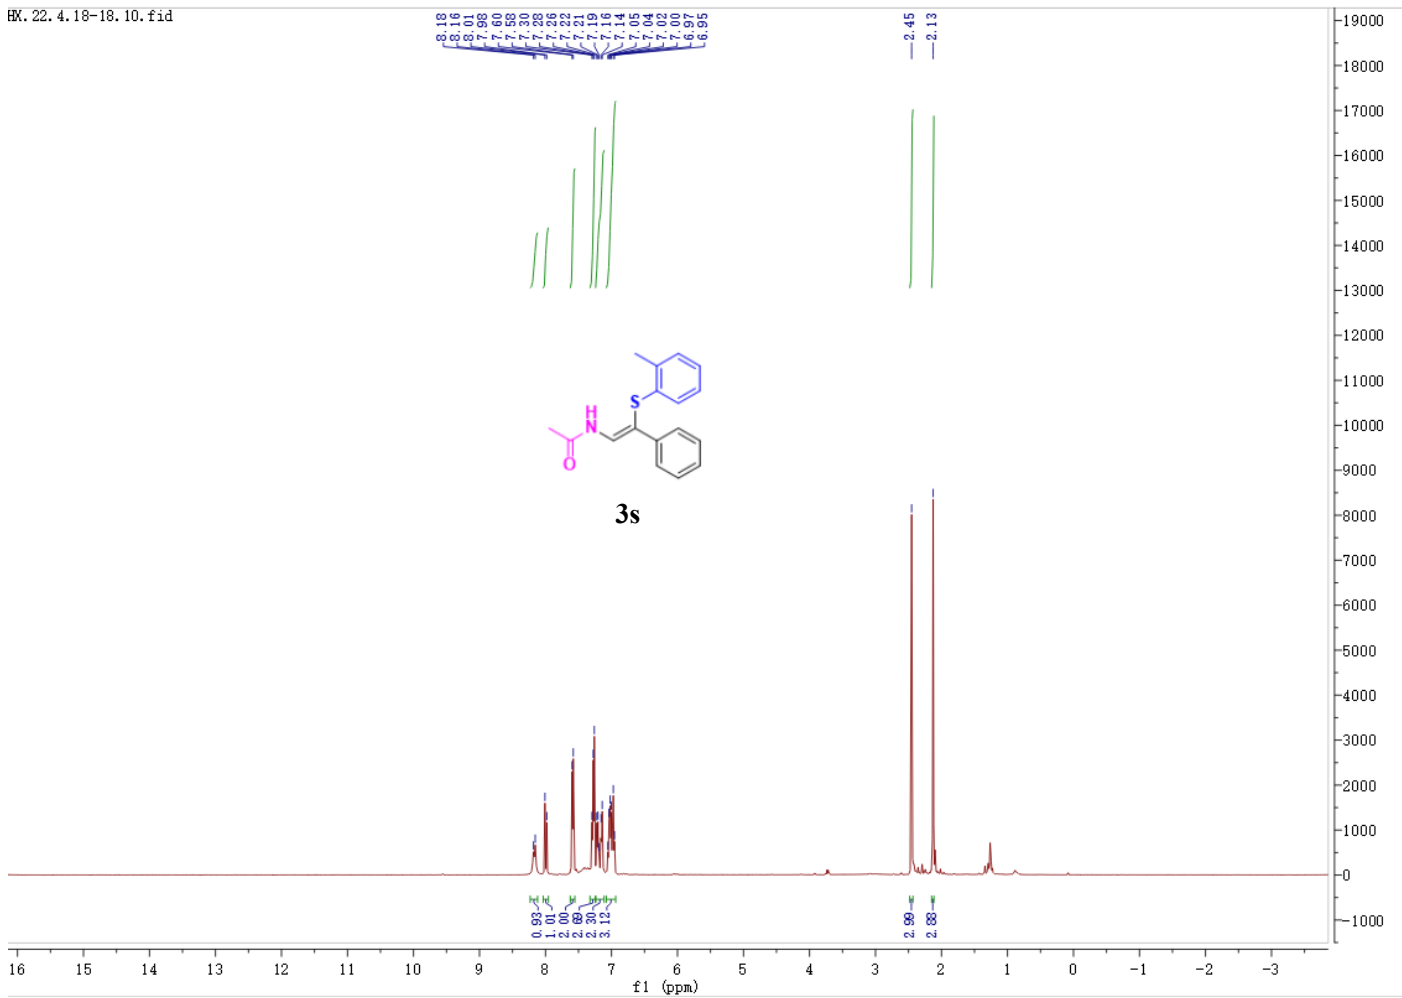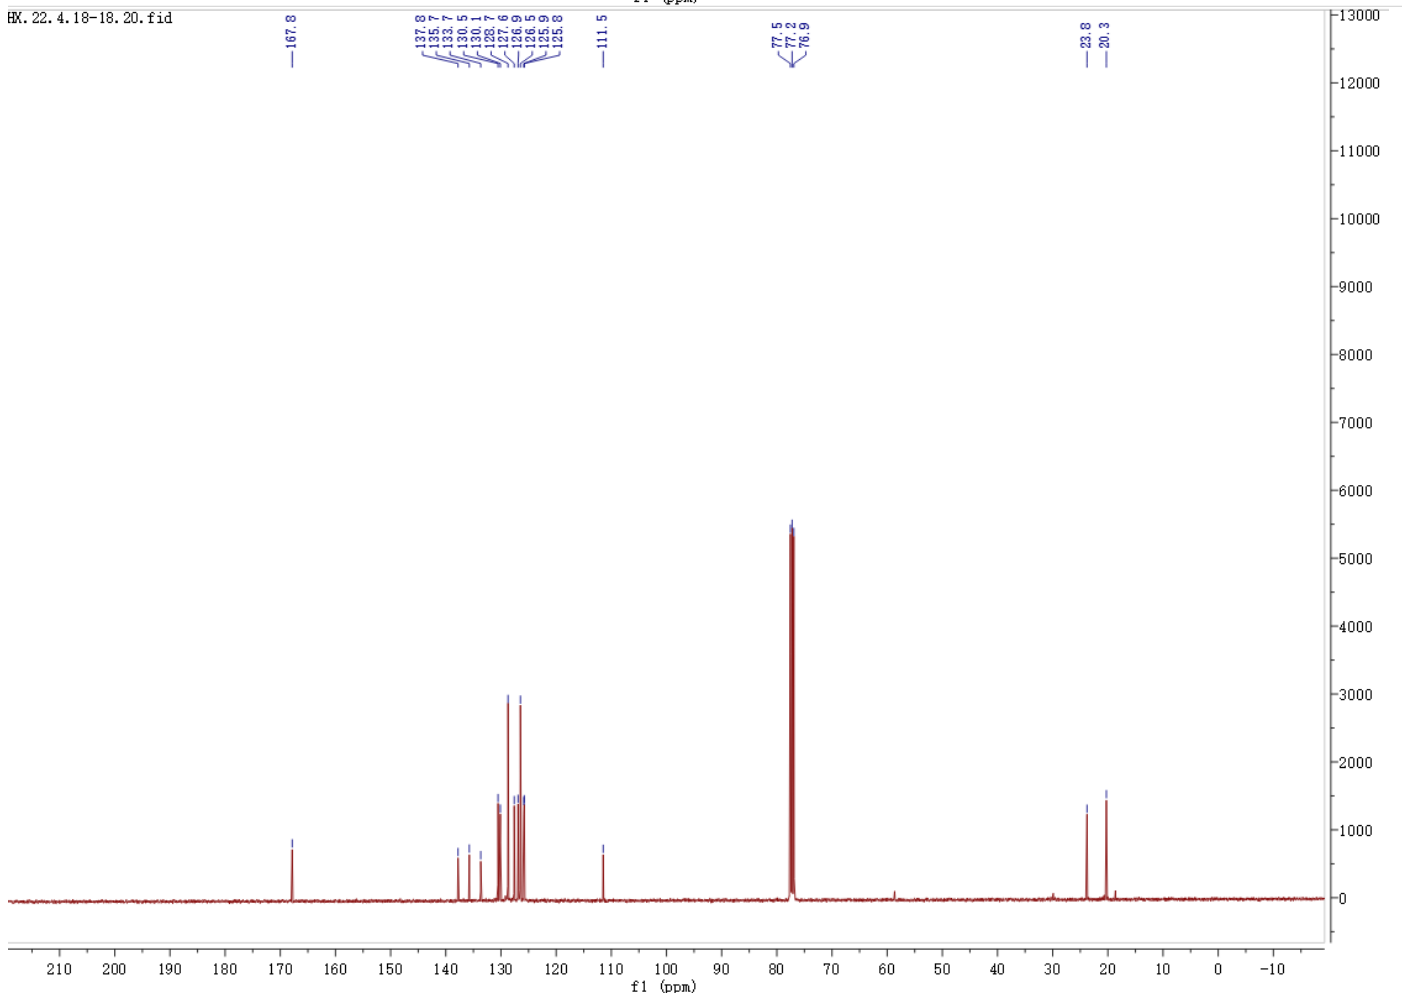

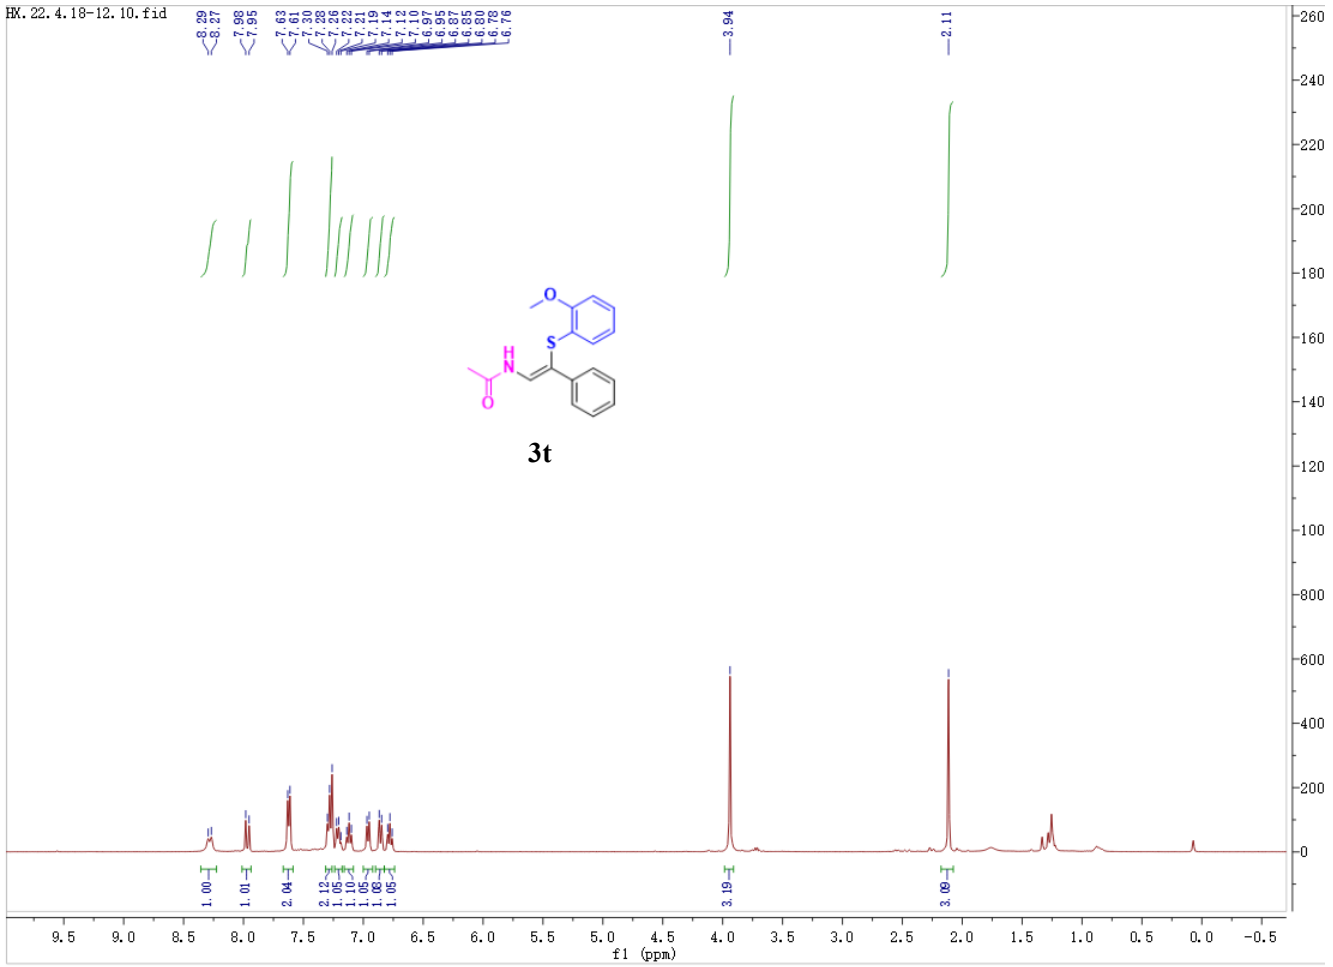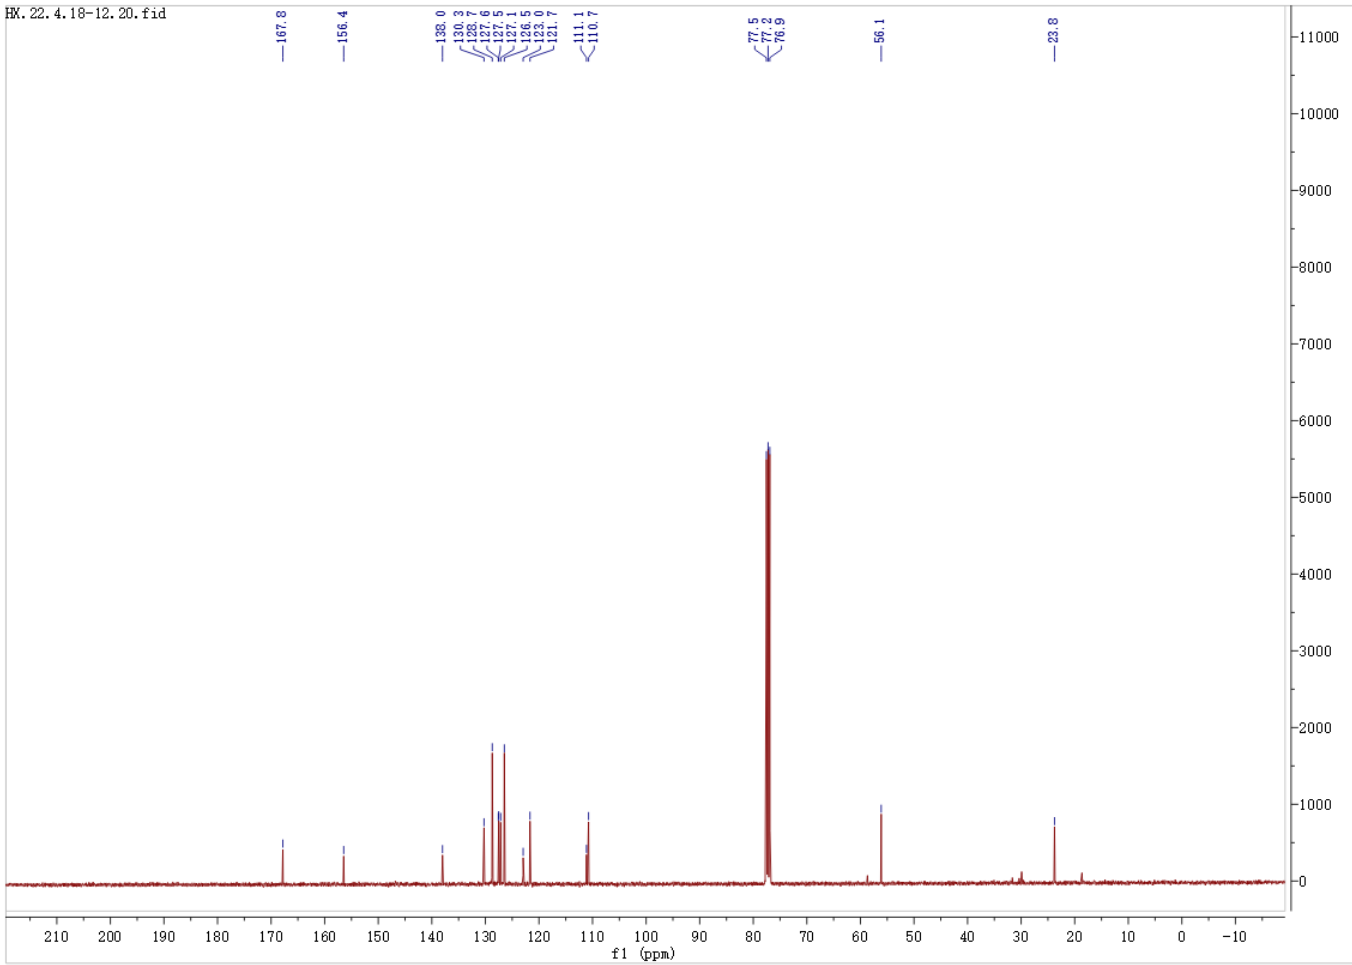

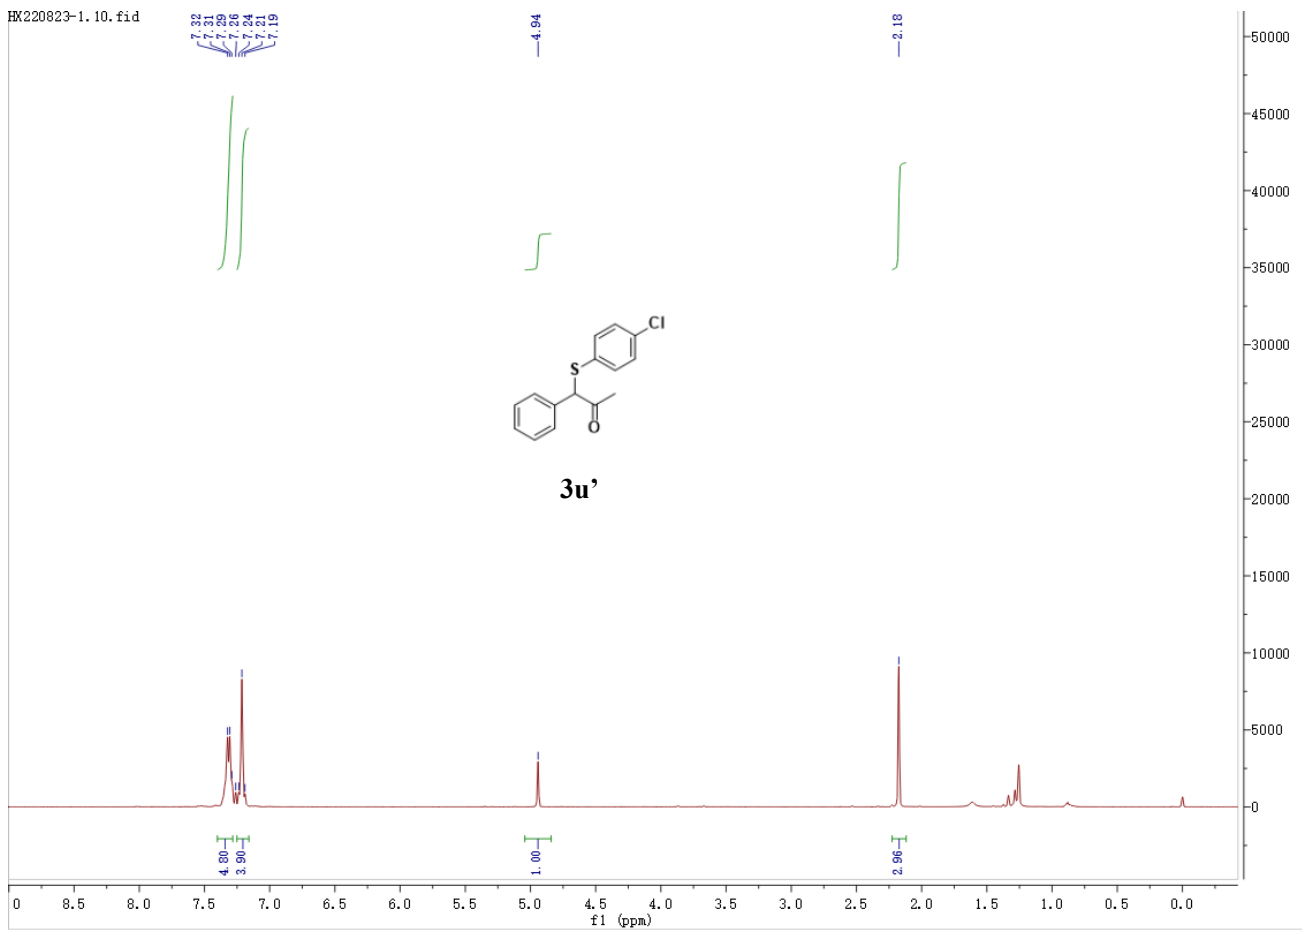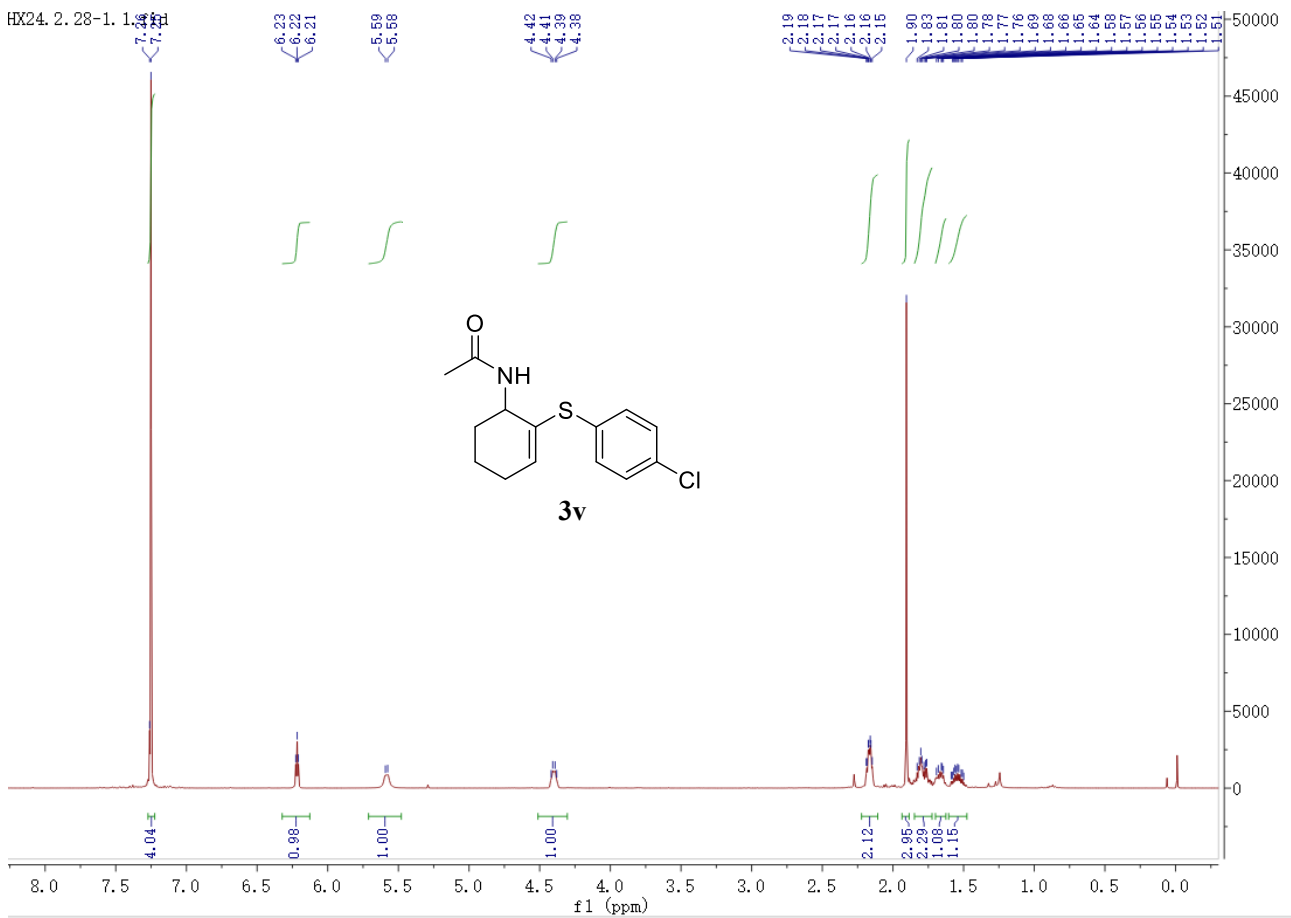

HX24.2.28-1.4.fid

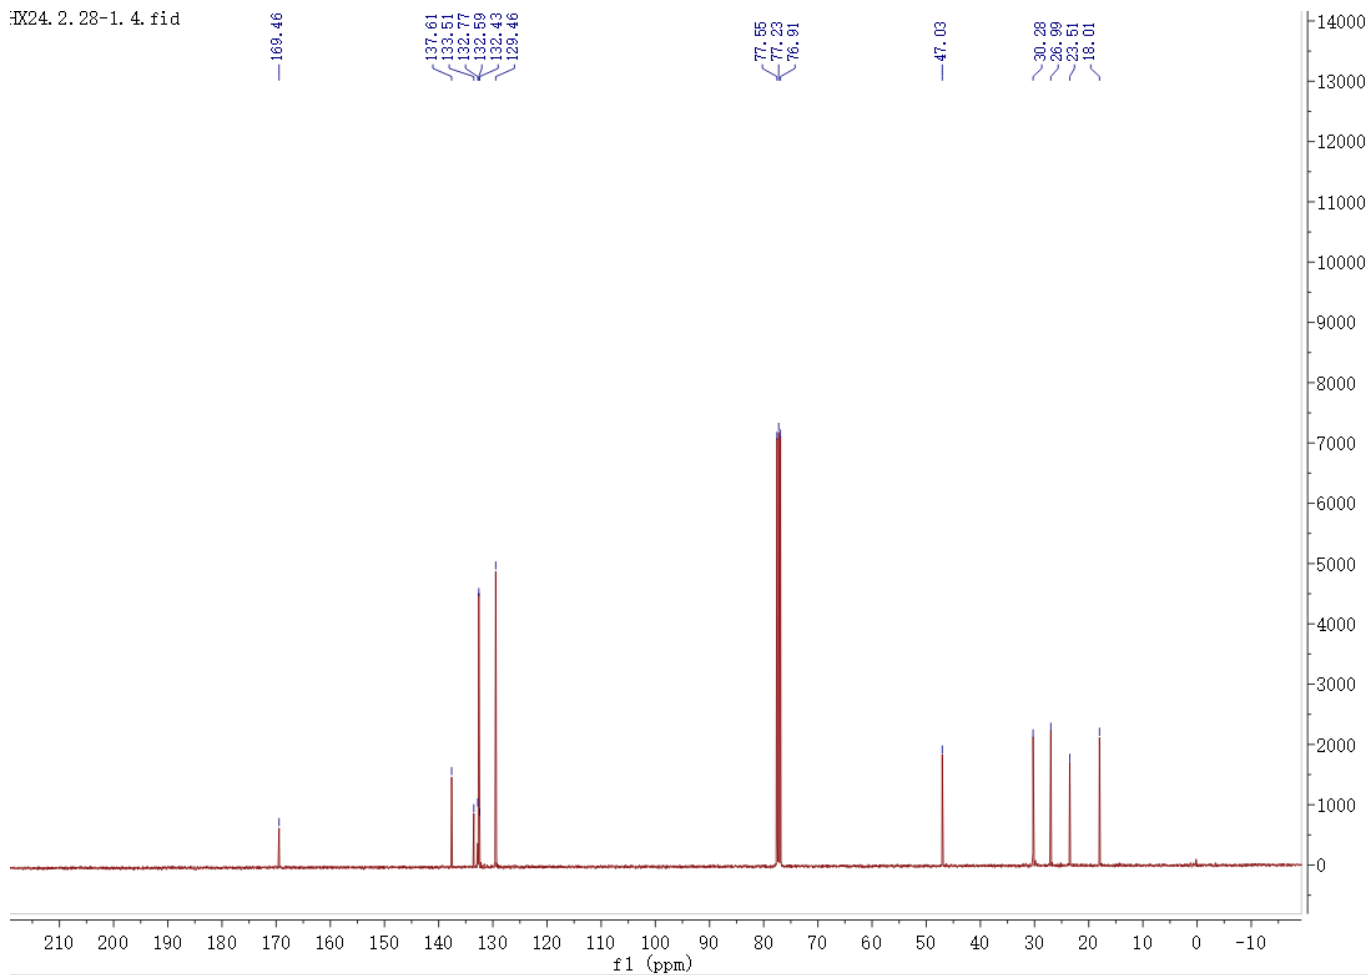

HX24.2.28-1.5.ser

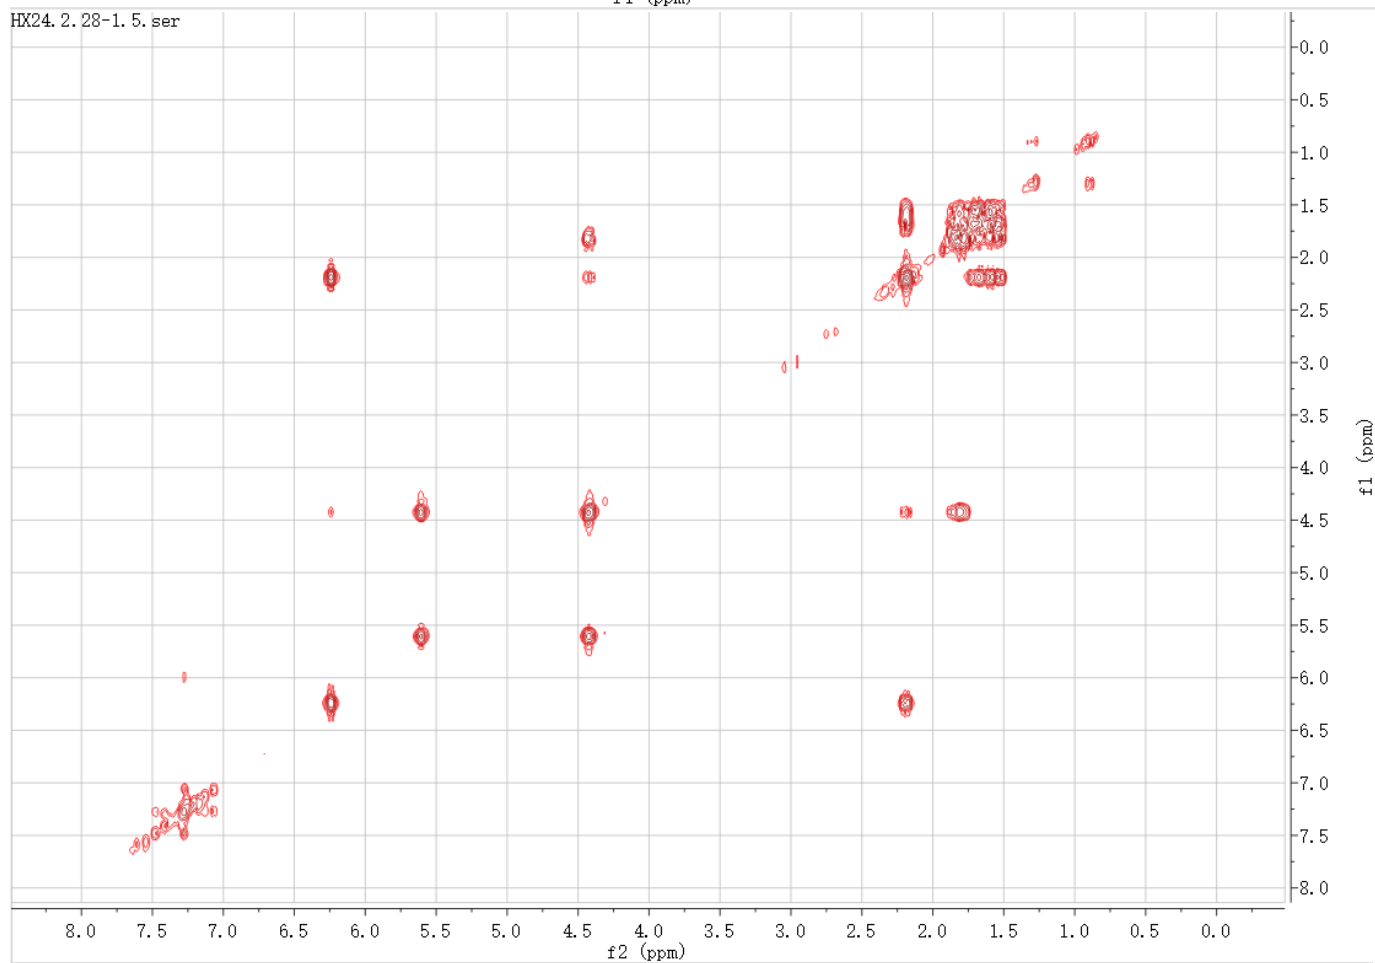

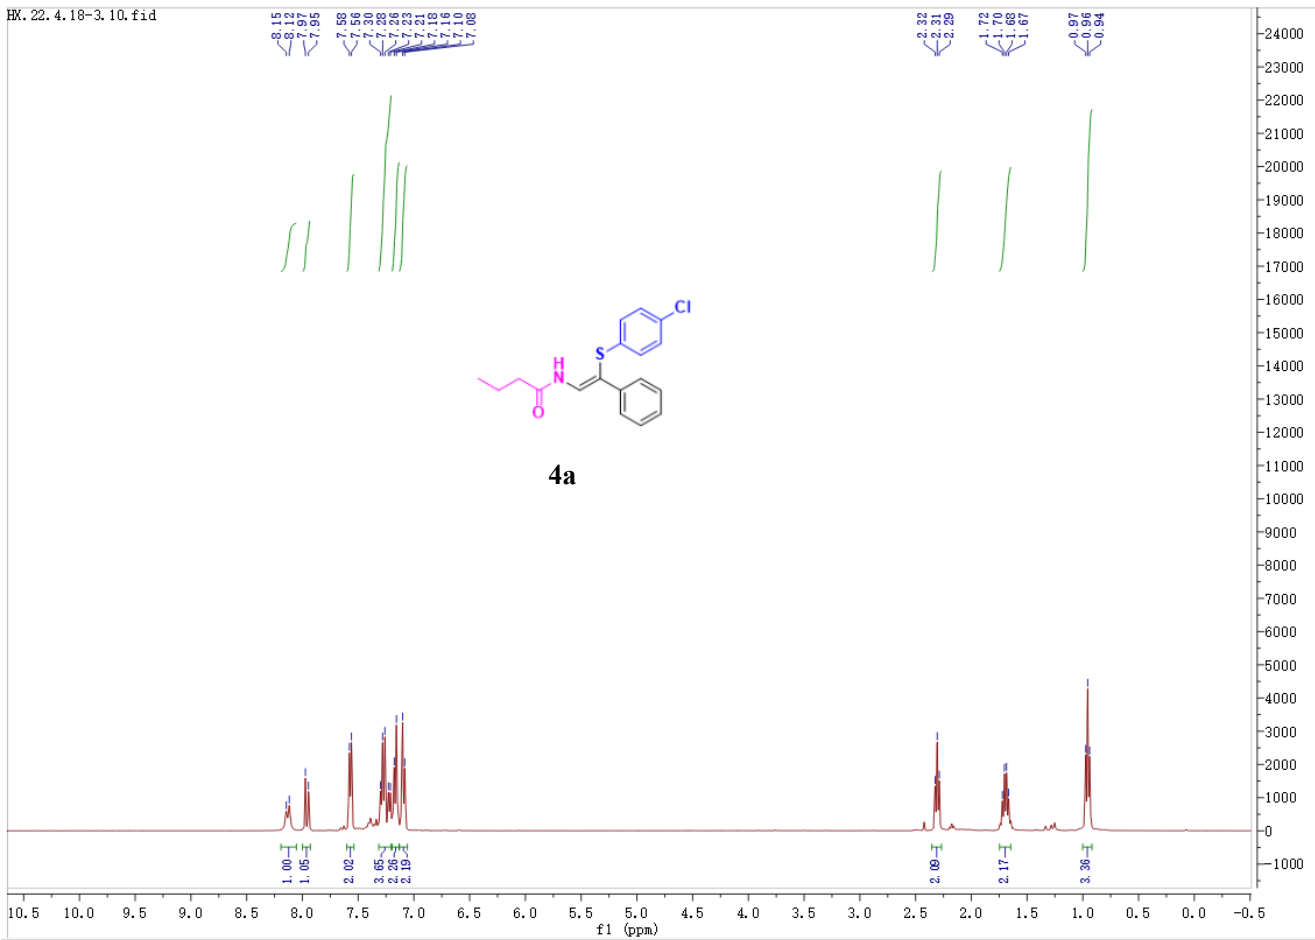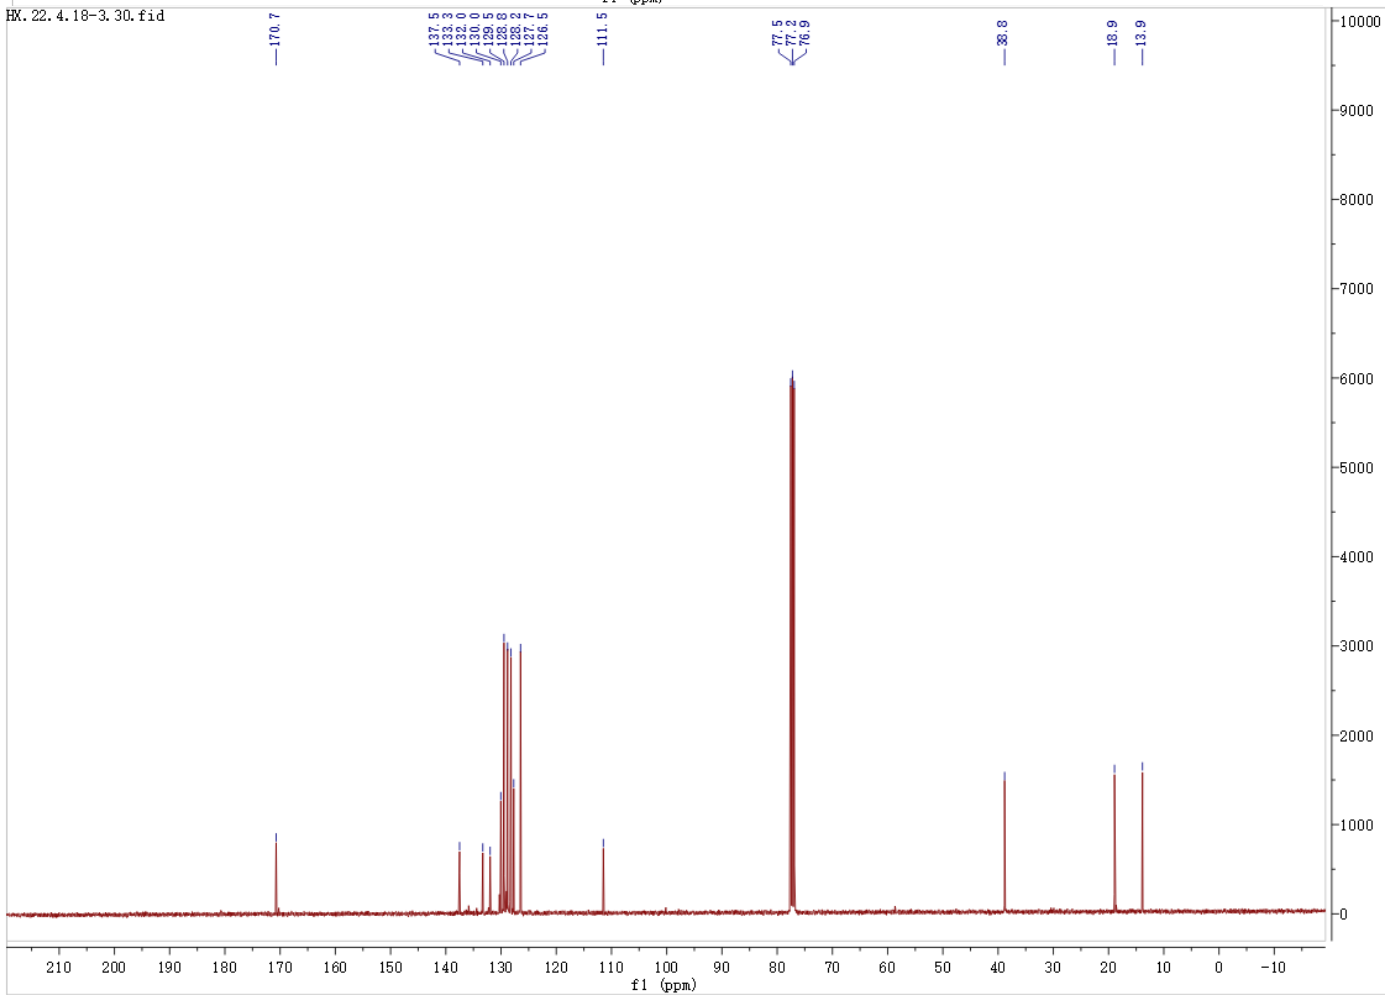



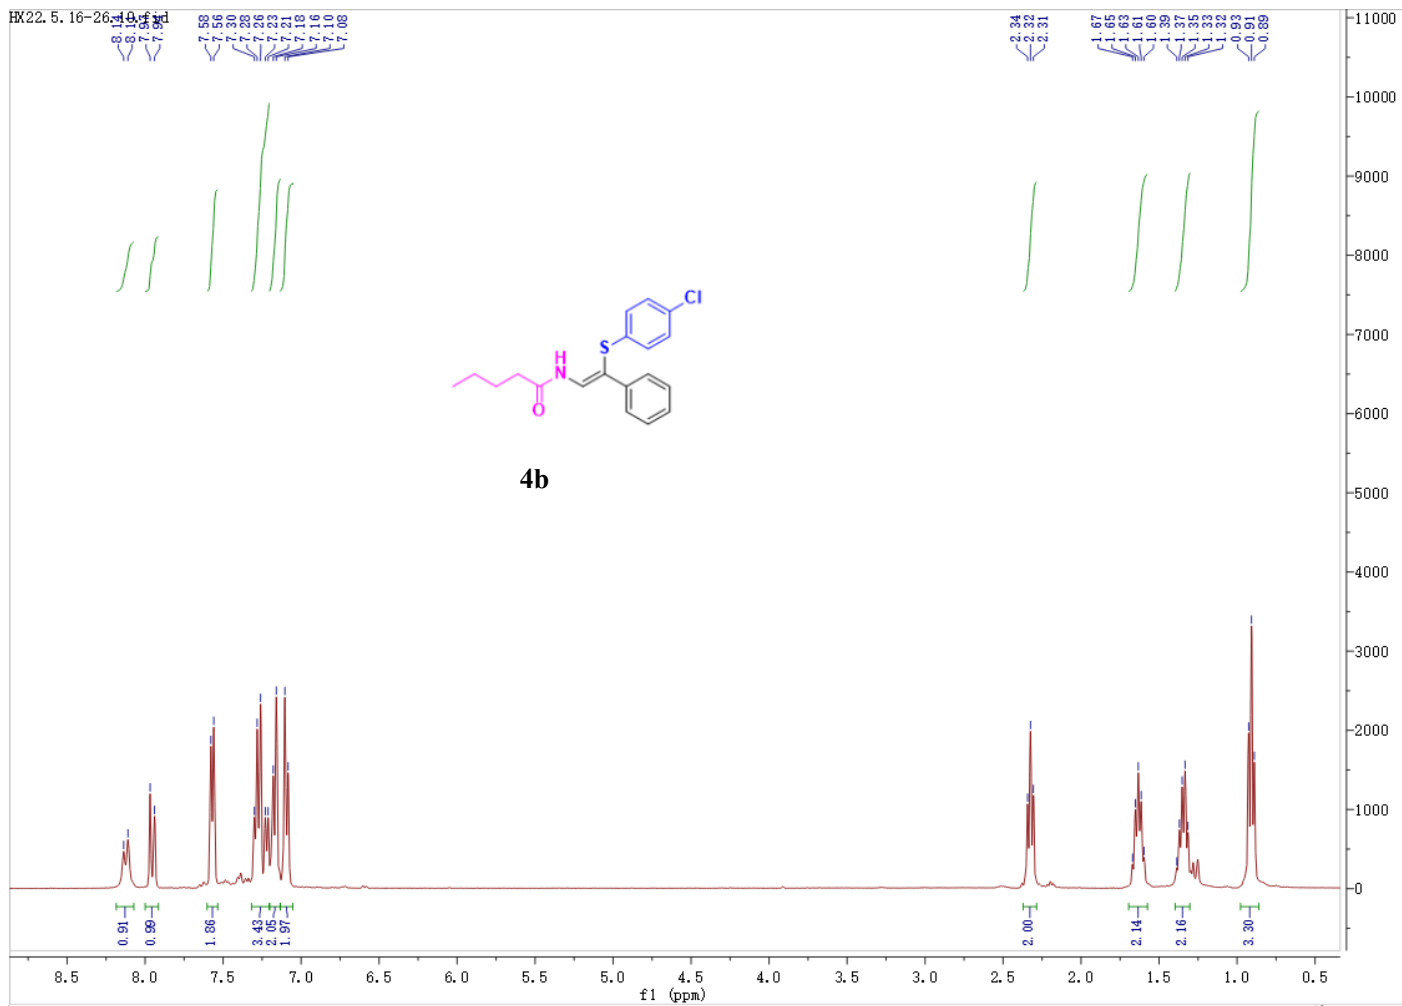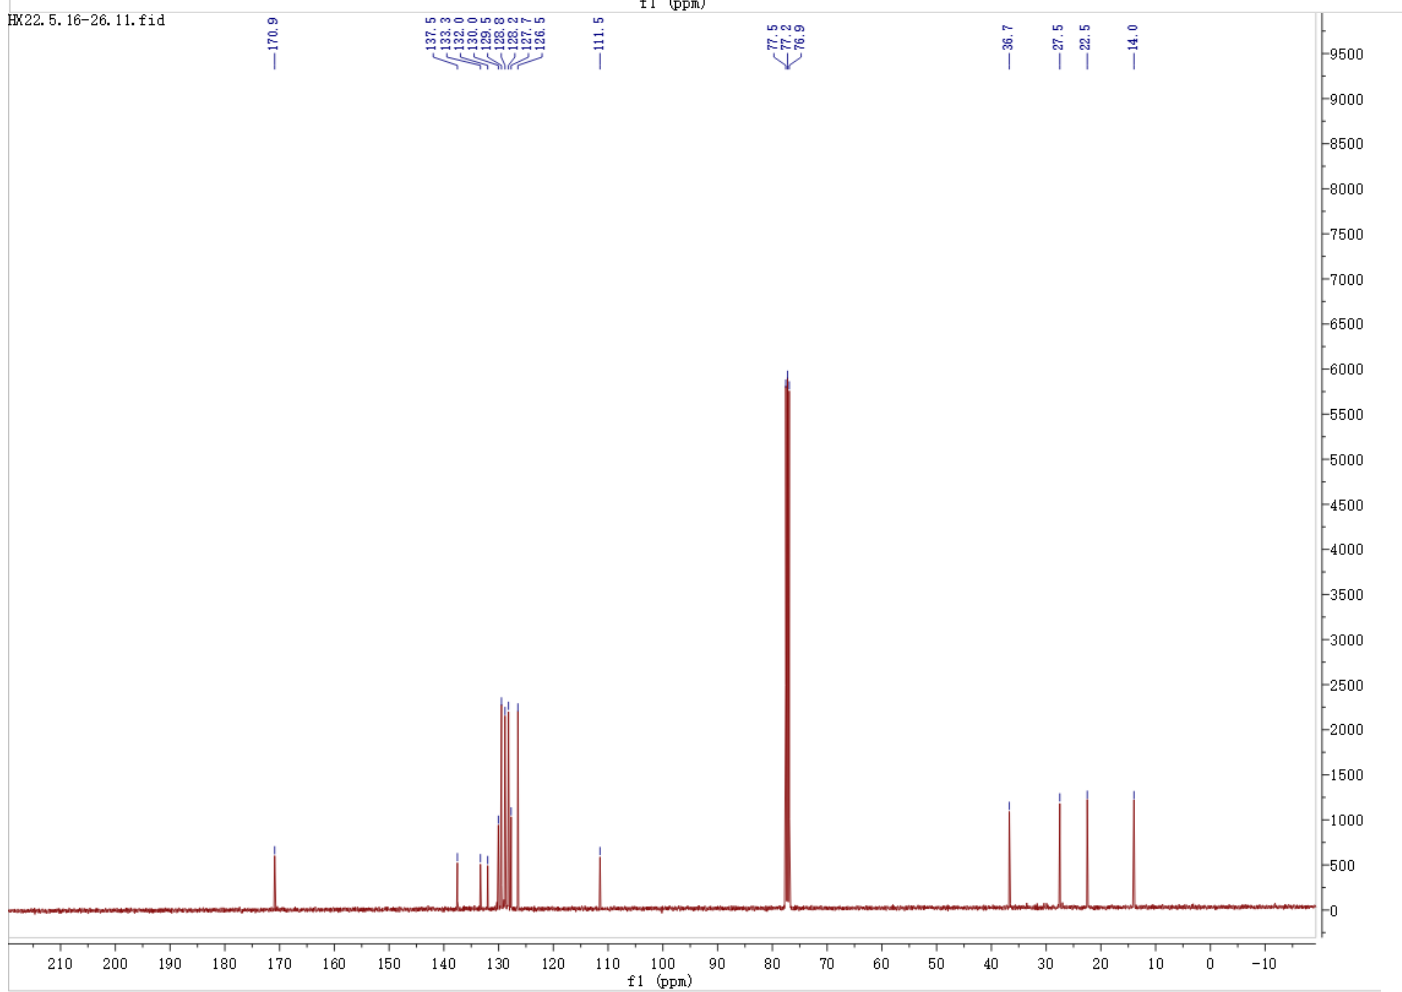



HX220601-25.10.fid

8.11  
8.09  
7.91  
7.87  
7.84  
7.836  
7.830  
7.828  
7.826  
7.823  
7.819  
7.813  
7.809  
6.93  
6.91

3.68

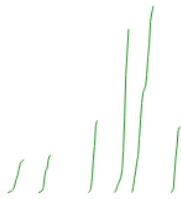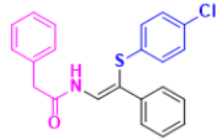

4d

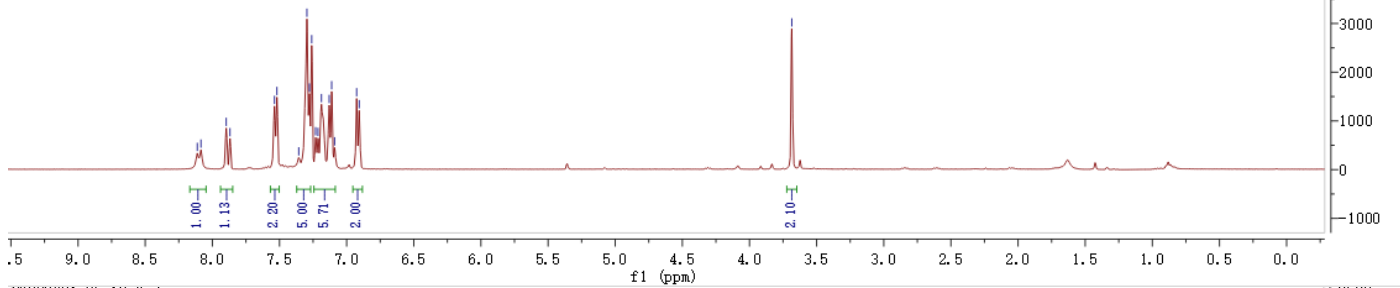

HX220601-25.12.fid

168.6

137.6  
133.5  
133.1  
131.0  
129.6  
129.5  
129.4  
128.9  
128.8  
128.0  
127.8  
126.5

112.8

77.5  
77.2  
76.9

44.0

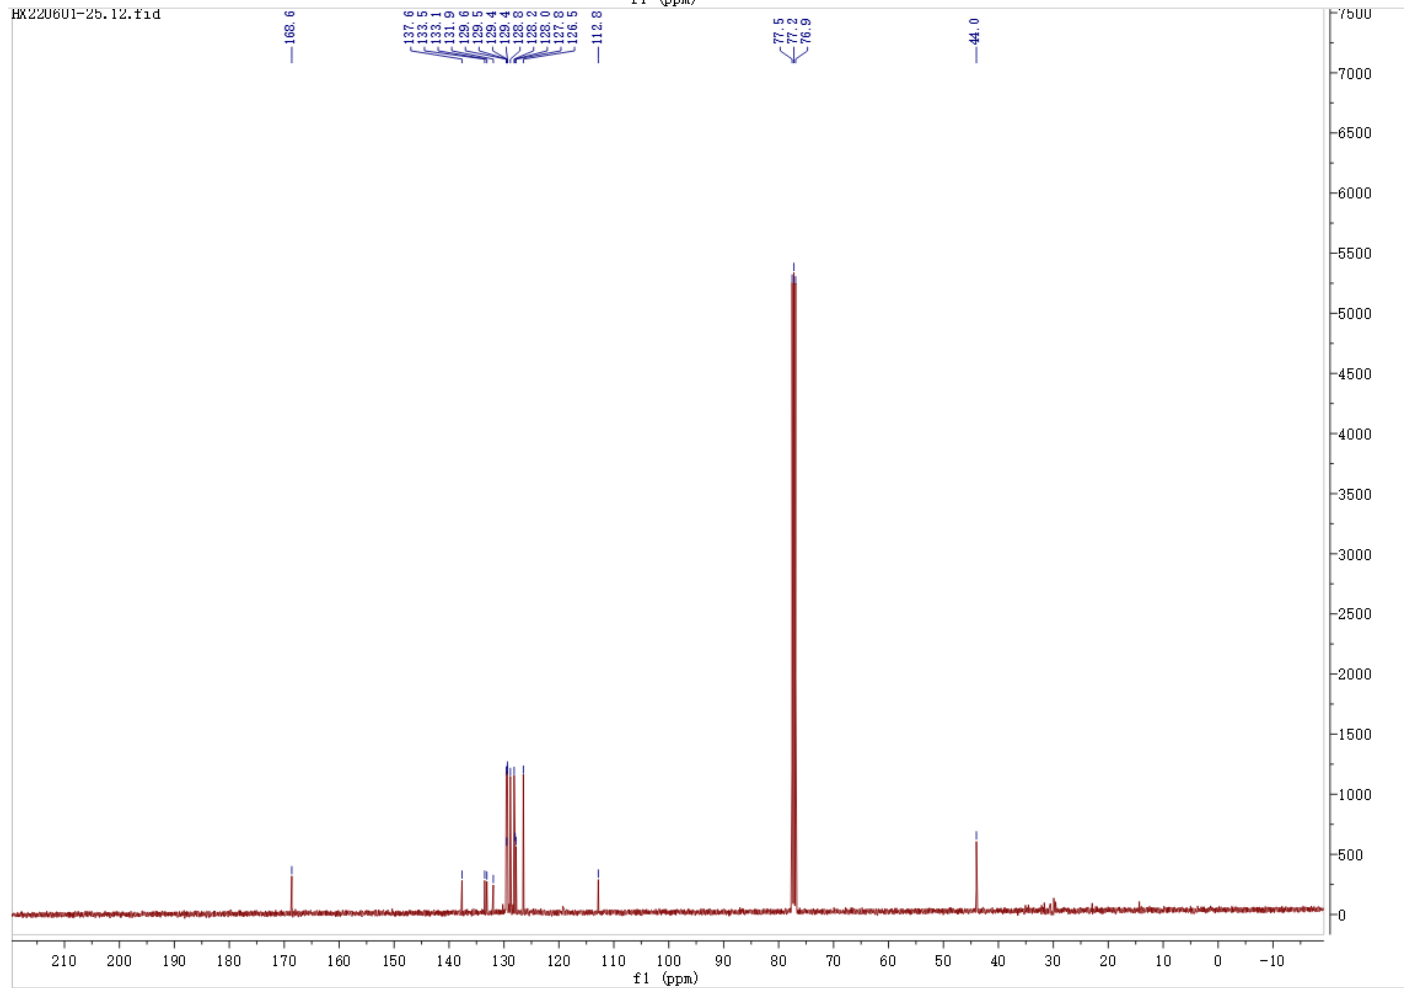

HX22.5.16-24.10.fid

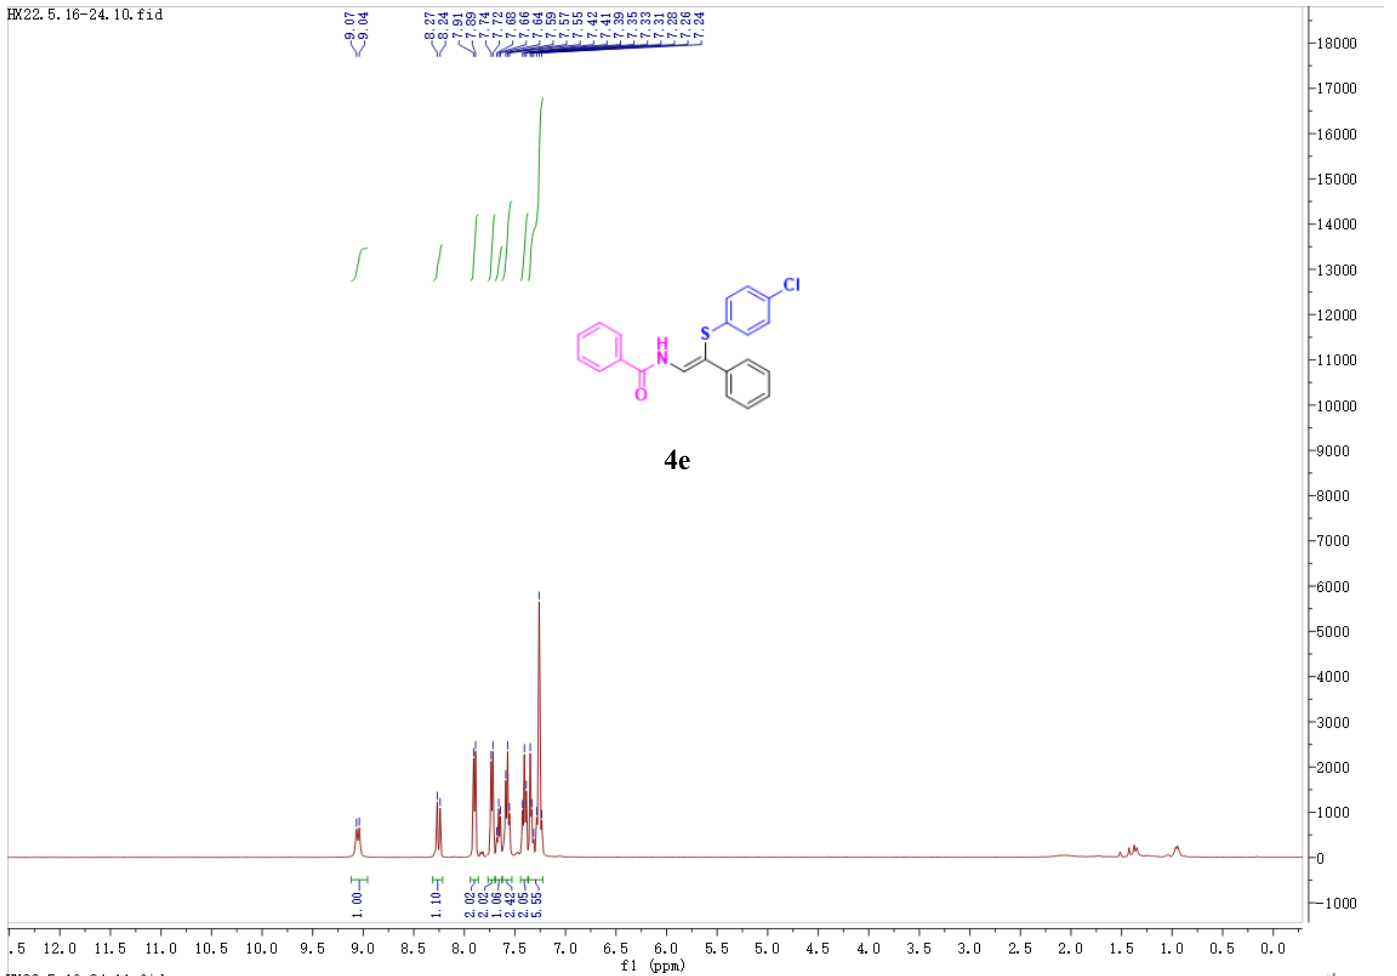

HX22.5.16-24.11.fid

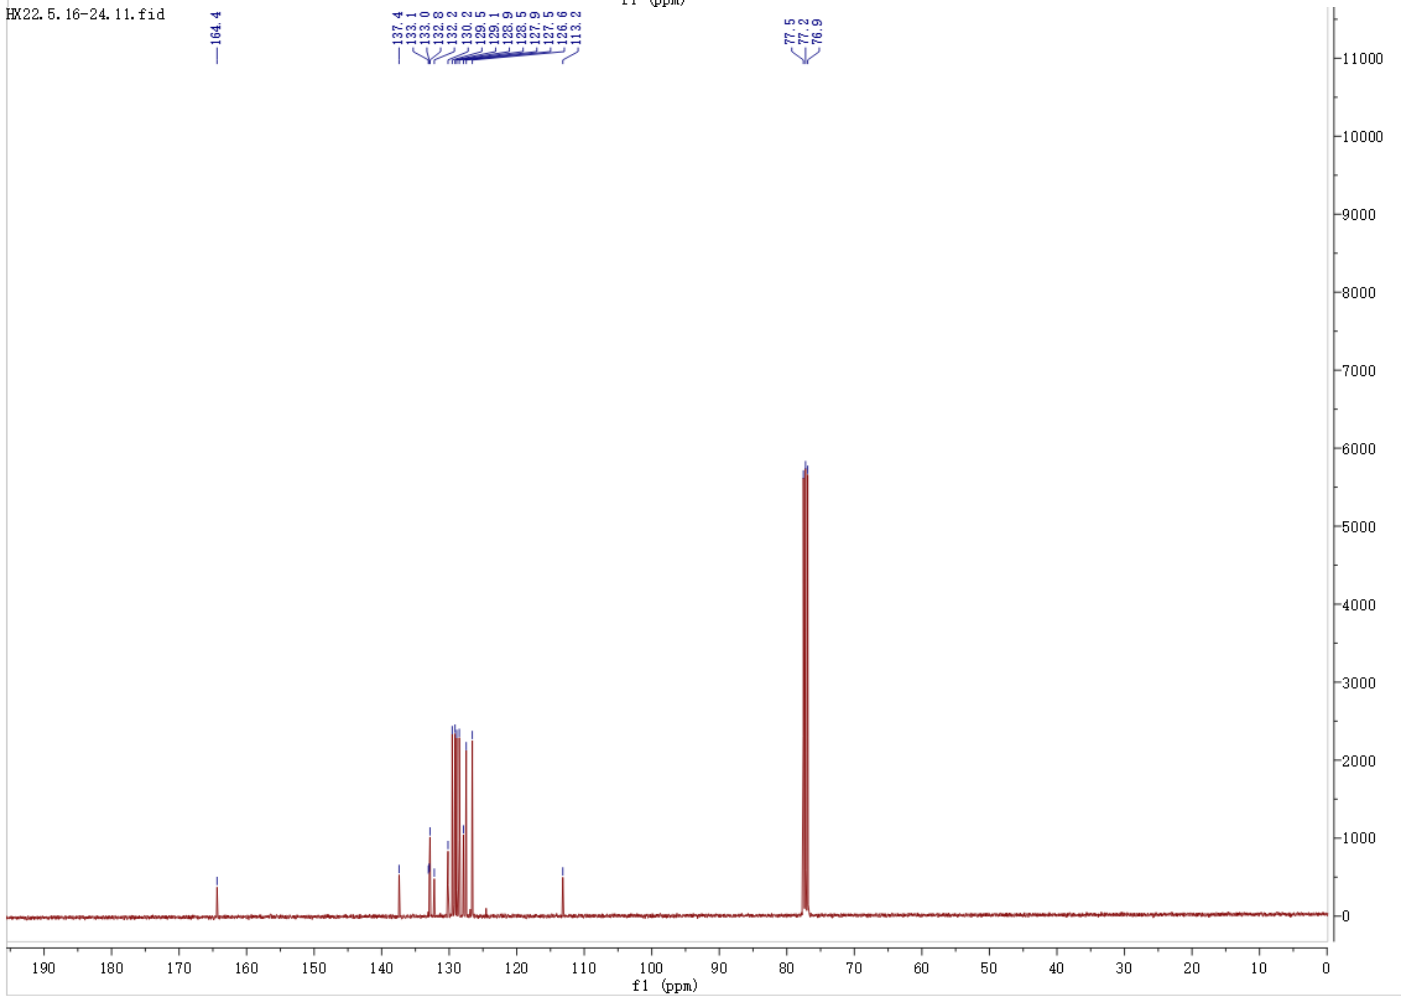

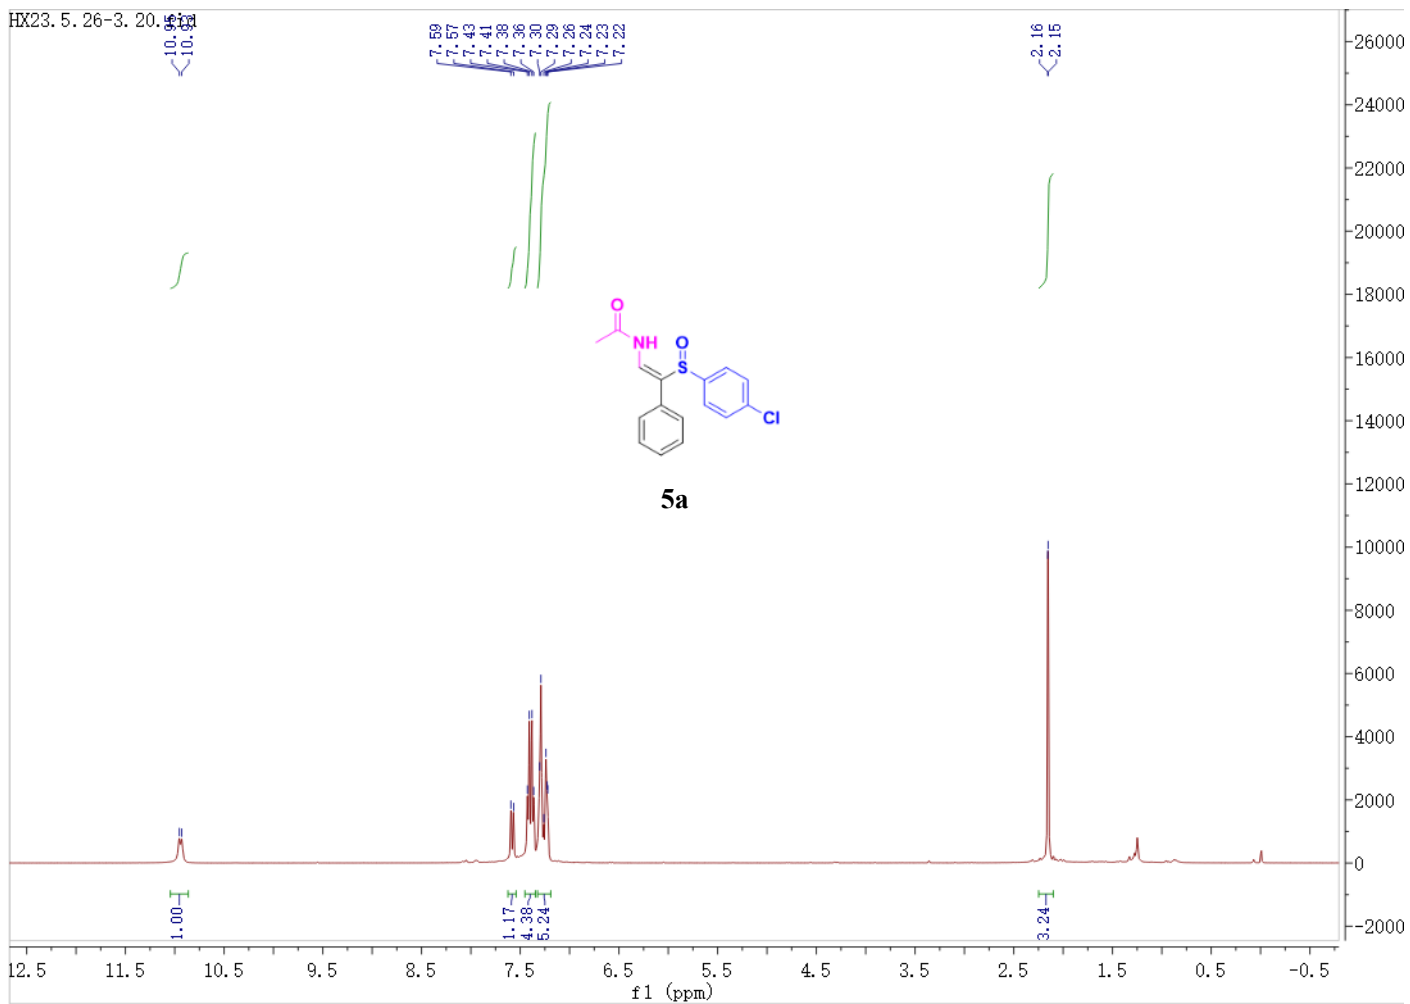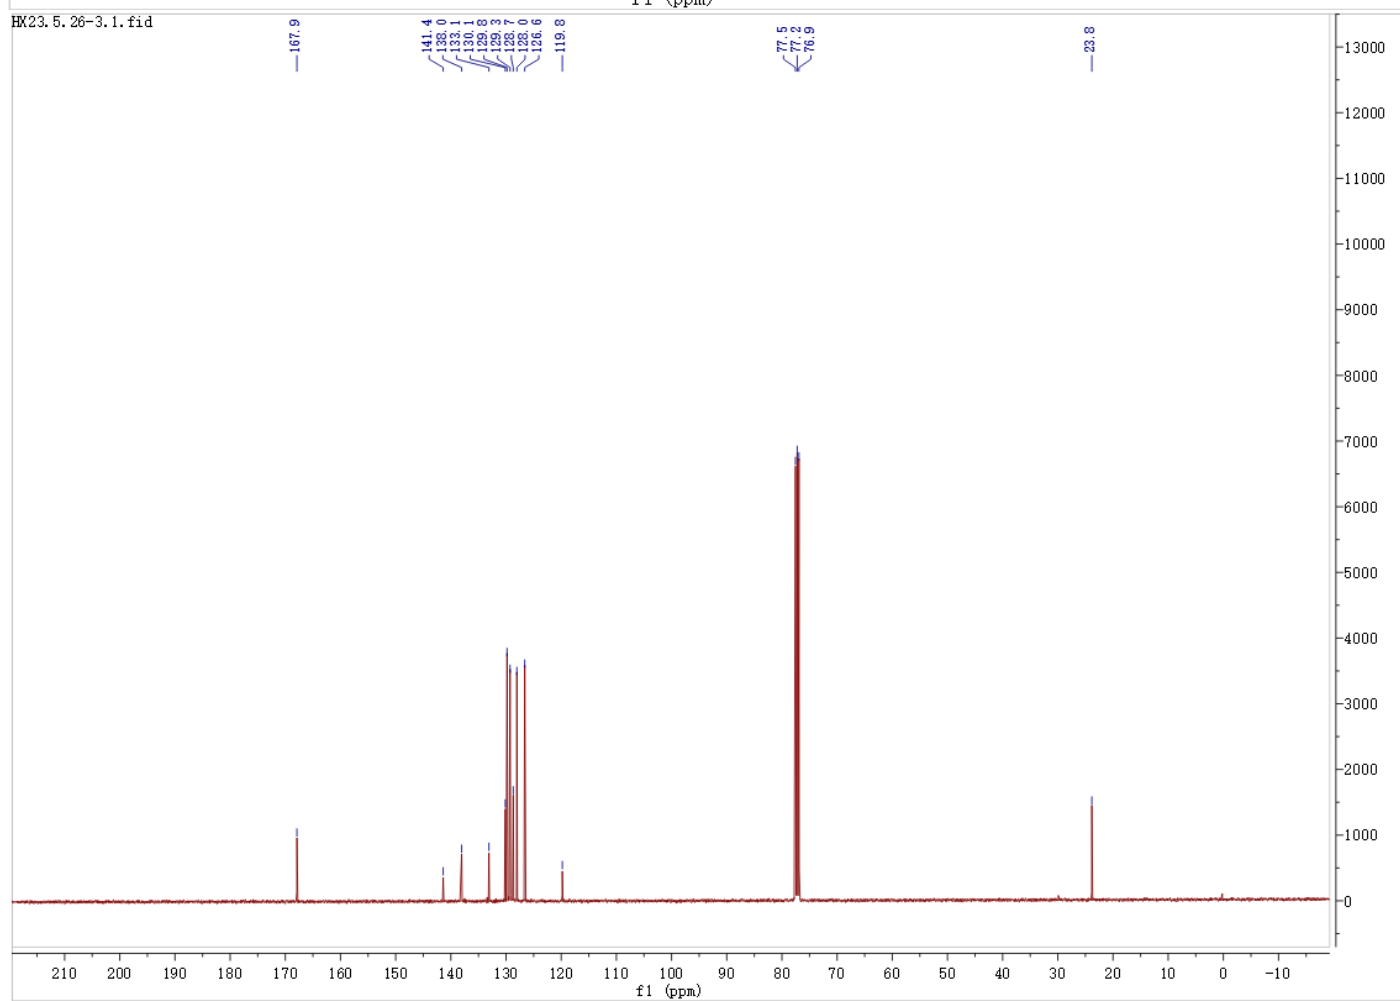

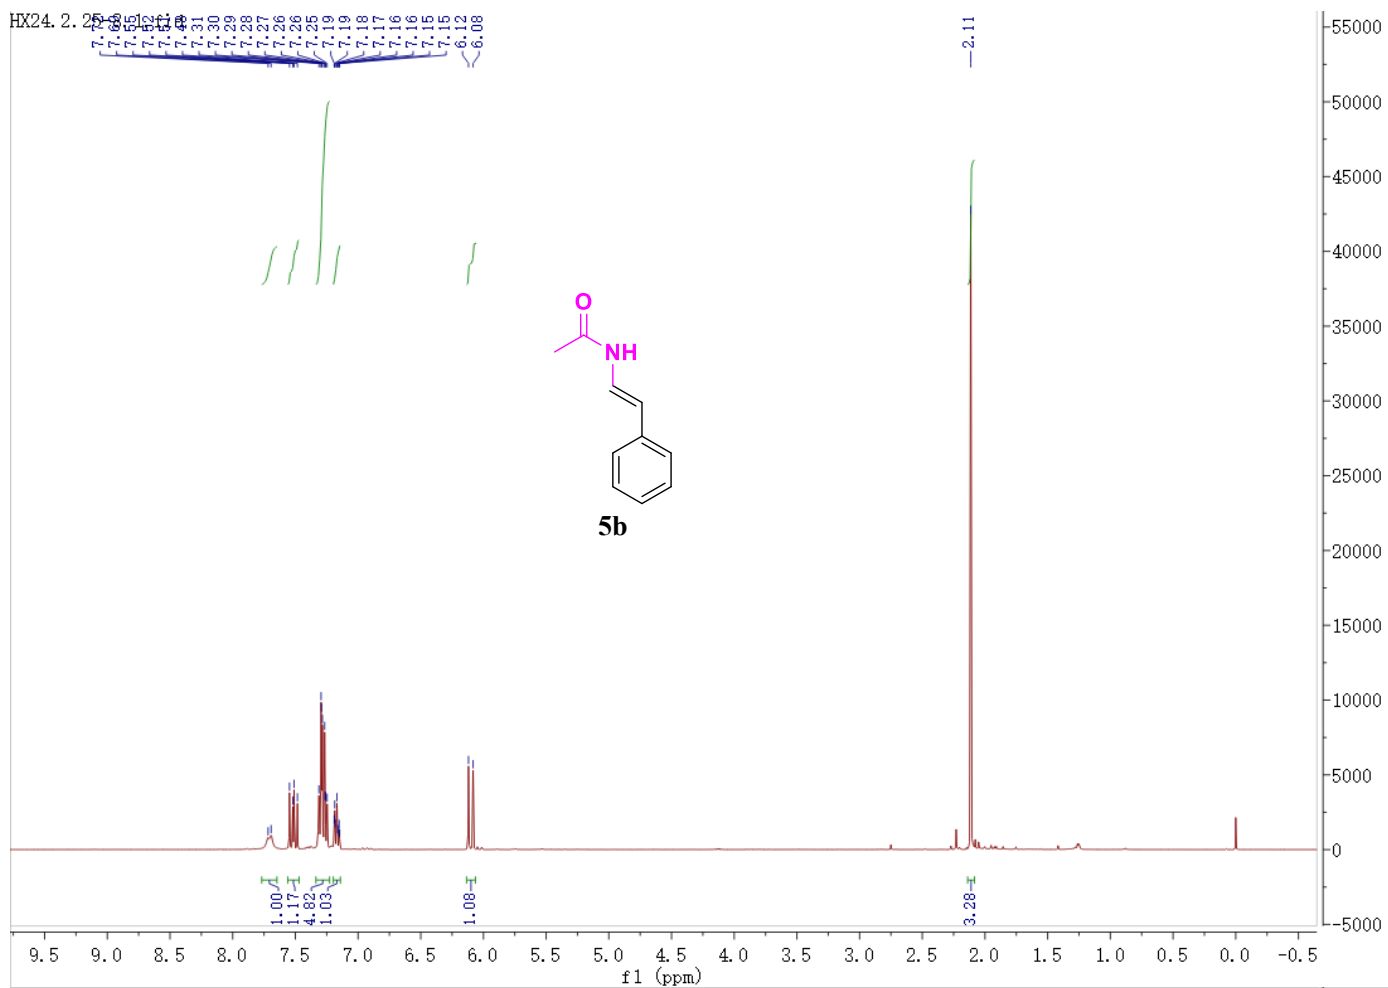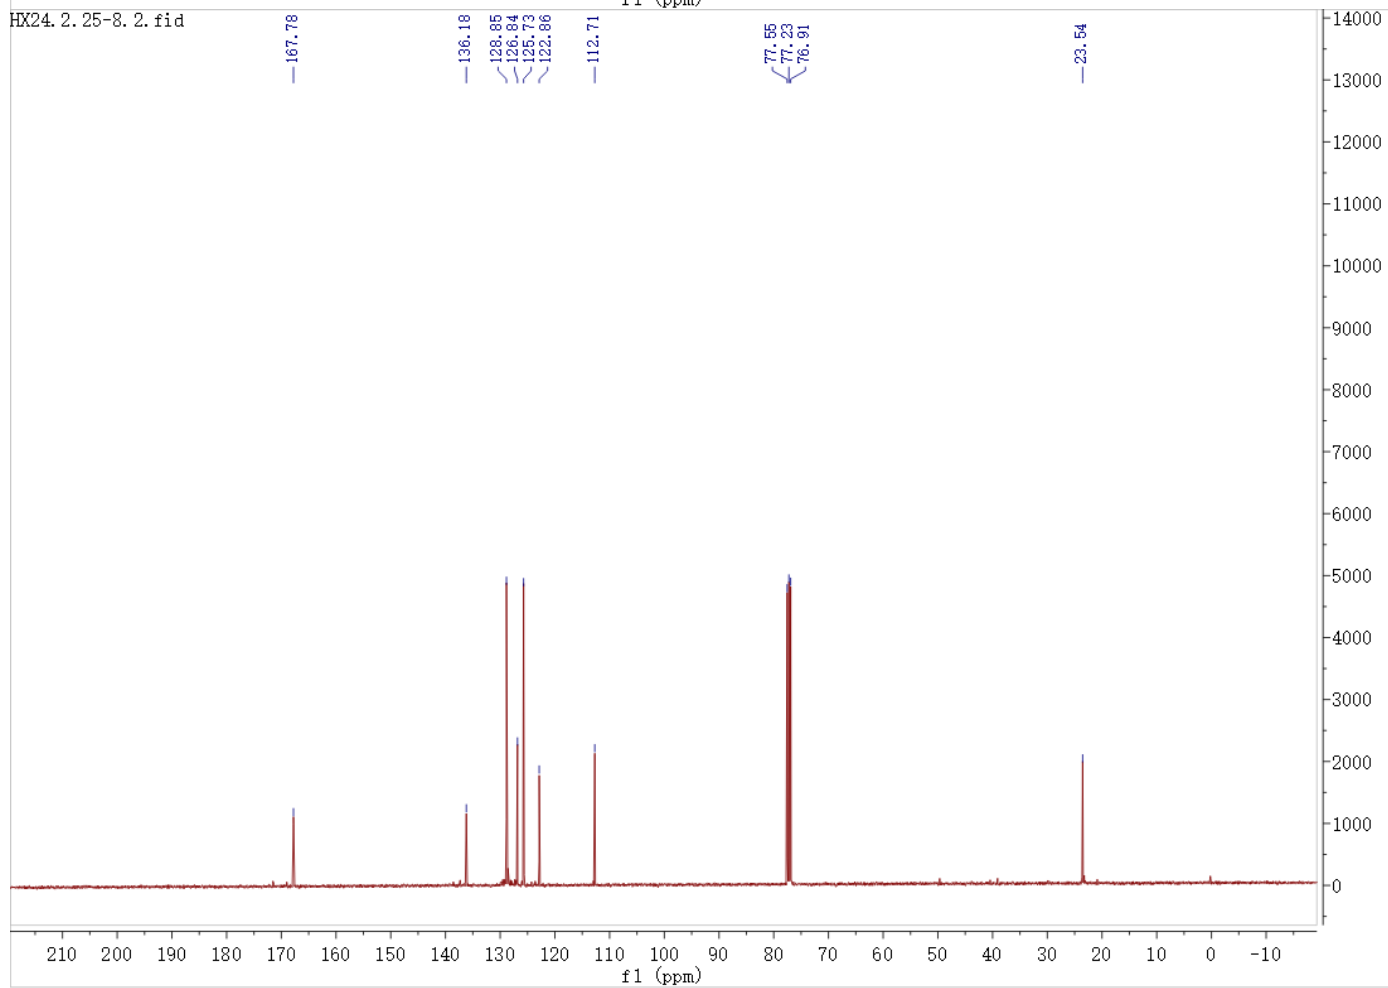

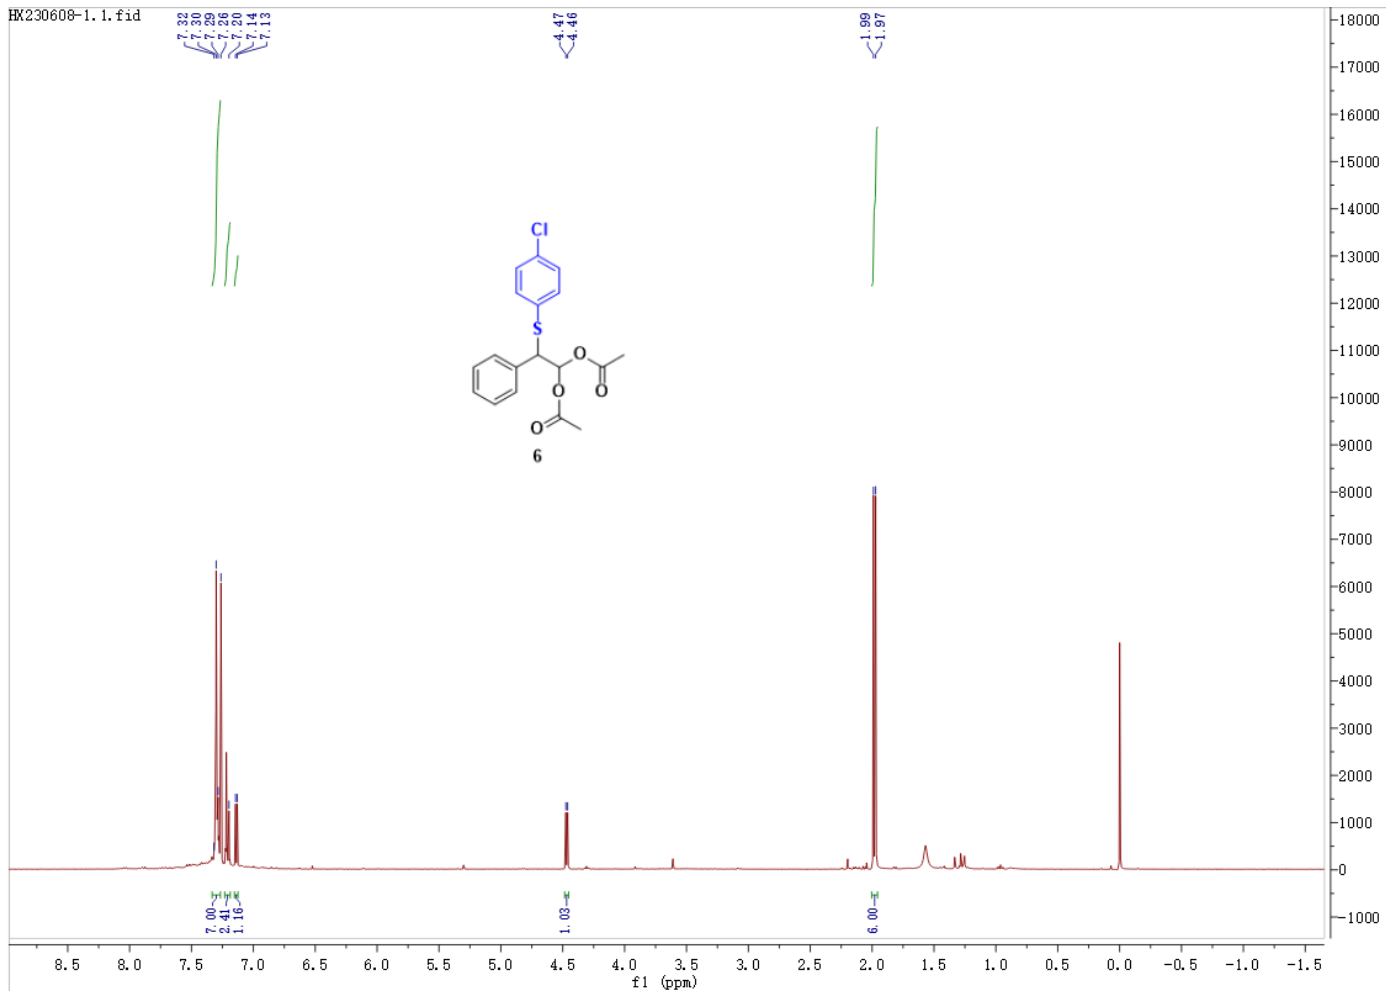

Supplement: d3qo02078a1.pdf [file d3qo02078a1.pdf]
